# Supplementary material for: DNA methylation profiles of human active and inactive X chromosomes
Source: HighWire-hosted journal article supplement (doi:10.1101/gr.112680.110), 2011-08-23
Supplement: Supplementary_Table1_Methylation_at_CpG_islands.xlsx [file Supplementary_Table1_Methylation_at_CpG_islands.xlsx]

## Sheet: Sheet1
Supplementary Table 1. Methylation levels at 2308 CpG islands on the X chromome in 45,X and 46,XX individuals. Location of CpG islands was taken from Bock et al (2007), with those separated by <500bp (n=726) merged into single regions.
chr	CpG island start	CpG island end	CpG island size	CpG island coordinate	Mean log2 in 46,XX	Mean log2 in 45,X	Difference (46,XX-45,X)	Mean StDev in 45,X	Mean StDev in 46,XX	t statistic	p value (45,X vs. 46,XX)
chrX	3704	4902	1198	chrX:3704-4902	1.30418	0.371717	0.932465	0.70415	0.452653	6.79258	8.96e-09
chrX	6389	6598	209	chrX:6389-6598	1.22036	1.47886	-0.2585	0.221283	0.152319	-1.87859	0.0750417
chrX	8715	10645	1930	chrX:8715-10645	0.933413	-0.0385198	0.971932	0.456034	0.313585	9.33162	2.98e-16
chrX	15742	16113	371	chrX:15742-16113	1.53686	1.58722	-0.0503524	0.489727	0.16725	-0.287516	0.775871
chrX	88111	89625	1514	chrX:88111-89625	1.36903	0.257896	1.11113	0.587314	0.072416	10.1022	8.1e-17
chrX	94474	94853	379	chrX:94474-94853	1.486	1.62981	-0.143811	0.569834	0.330626	-1.05512	0.298362
chrX	106453	107801	1348	chrX:106453-107801	0.479091	0.245985	0.233106	0.3347	0.649231	1.21937	0.237406
chrX	110061	110764	703	chrX:110061-110764	1.44184	0.508977	0.932864	0.570557	0.315495	8.40485	1.64e-12
chrX	111522	111938	416	chrX:111522-111938	1.42273	0.428106	0.994621	0.50403	0.187833	7.05252	1.23e-08
chrX	112542	113017	475	chrX:112542-113017	1.33262	0.10797	1.22465	0.614584	0.244366	8.57702	1.44e-11
chrX	117891	118186	295	chrX:117891-118186	1.29139	0.0836869	1.20771	0.523769	0.138117	9.34481	4.23e-09
chrX	120713	120958	245	chrX:120713-120958	1.16345	0.414141	0.749313	0.305437	0.277839	6.14728	1.6e-06
chrX	124459	127908	3449	chrX:124459-127908	1.42235	0.678273	0.744073	0.557708	0.420525	6.12194	1.69e-08
chrX	132354	133872	1518	chrX:132354-133872	0.630329	0.246141	0.384188	0.438721	0.478805	4.82143	3.29e-06
chrX	137760	138379	619	chrX:137760-138379	1.56856	0.348545	1.22002	0.528561	0.504494	7.77185	3.1e-10
chrX	145187	145618	431	chrX:145187-145618	1.3455	0.064053	1.28145	0.607005	0.484173	8.09614	5.21e-10
chrX	147079	147542	463	chrX:147079-147542	1.63	0.45956	1.17044	0.608455	0.510093	8.74193	1.73e-11
chrX	148076	148467	391	chrX:148076-148467	1.68898	0.536023	1.15295	0.549268	0.160011	7.91757	7.3e-10
chrX	149547	150041	494	chrX:149547-150041	1.24505	0.404924	0.840121	0.483044	0.159502	6.78835	3.46e-08
chrX	151821	152224	403	chrX:151821-152224	1.19558	0.0885354	1.10704	0.389937	0.295613	9.36908	1.73e-10
chrX	155562	156149	587	chrX:155562-156149	1.57047	0.617576	0.952897	0.56153	0.171083	6.79857	2.01e-08
chrX	158871	159078	207	chrX:158871-159078	1.29082	0.448788	0.84203	0.408948	0.180058	5.93469	9.32e-06
chrX	159675	160032	357	chrX:159675-160032	1.60134	0.989886	0.611455	0.28062	0.362902	4.27031	0.000116879
chrX	161287	161988	701	chrX:161287-161988	1.39729	0.350335	1.04695	0.570702	0.36636	9.32503	1.18e-13
chrX	163861	164653	792	chrX:163861-164653	1.05493	0.166835	0.888094	0.545227	0.231571	9.78255	6.86e-16
chrX	165682	166019	337	chrX:165682-166019	1.41994	0.701136	0.718803	0.362033	0.459982	4.65572	5.76e-05
chrX	167467	169979	2512	chrX:167467-169979	1.23201	0.248339	0.983675	0.682263	0.286628	12.9063	4.75e-30
chrX	170648	171203	555	chrX:170648-171203	1.20402	0.121242	1.08278	0.517024	0.224749	8.81178	9.92e-12
chrX	201389	201620	231	chrX:201389-201620	0.769545	0.794621	-0.0250758	0.537681	0.224912	-0.105224	0.917689
chrX	203925	205050	1125	chrX:203925-205050	1.0713	0.416191	0.655108	0.395608	0.357733	6.25106	2.6e-08
chrX	208437	209022	585	chrX:208437-209022	1.55236	0.41903	1.13333	0.574407	0.128052	8.46219	2.26e-11
chrX	210082	210372	290	chrX:210082-210372	1.57739	0.681061	0.896333	0.476673	0.651699	4.29034	0.000162015
chrX	211319	213519	2200	chrX:211319-213519	1.10588	0.280158	0.825722	0.515803	0.434294	12.3342	2.7e-27
chrX	214025	217311	3286	chrX:214025-217311	1.51534	0.54948	0.965862	0.558351	0.208913	13.029	2.88e-30
chrX	218096	220025	1929	chrX:218096-220025	1.34704	0.260136	1.08691	0.741747	0.243349	12.1115	1.55e-25
chrX	220933	228948	8015	chrX:220933-228948	1.34151	0.217297	1.12421	0.603043	0.412952	26.488	1.28e-105
chrX	230886	232164	1278	chrX:230886-232164	1.3544	0.0879836	1.26641	0.551502	0.177678	14.9601	7.62e-31
chrX	232884	233702	818	chrX:232884-233702	1.52382	0.164744	1.35907	0.663113	0.361009	11.6947	1.08e-18
chrX	235046	235301	255	chrX:235046-235301	1.53876	0.528283	1.01047	0.527641	0.401413	6.1637	7.88e-07
chrX	236733	236974	241	chrX:236733-236974	1.55109	1.47455	0.0765455	0.363948	0.386217	0.55003	0.58626
chrX	237480	237733	253	chrX:237480-237733	1.47894	0.819949	0.65899	0.633047	0.477603	3.79983	0.000682081
chrX	238596	239928	1332	chrX:238596-239928	1.52362	0.235379	1.28824	0.644494	0.481345	15.1228	5.69e-31
chrX	241517	243266	1749	chrX:241517-243266	1.4607	0.493864	0.966833	0.603299	0.541615	11.4399	3.2e-23
chrX	243843	245172	1329	chrX:243843-245172	1.47499	0.529859	0.945134	0.656502	0.417892	8.94749	1.19e-15
chrX	248328	249319	991	chrX:248328-249319	1.54252	1.04604	0.49648	0.456289	0.325111	4.29869	8.13e-05
chrX	250160	256604	6444	chrX:250160-256604	1.04066	0.313417	0.727242	0.483842	0.118909	14.4126	6.34e-41
chrX	258819	259720	901	chrX:258819-259720	1.23177	0.576651	0.655121	0.28277	0.670526	8.41935	4.48e-13
chrX	263770	263978	208	chrX:263770-263978	1.25891	0.600227	0.658682	0.326214	0.344915	4.05196	0.000777639
chrX	266854	268387	1533	chrX:266854-268387	0.39943	-0.0310253	0.430456	0.466632	0.345688	4.501	1.32e-05
chrX	271542	271764	222	chrX:271542-271764	1.87886	1.48727	0.391591	0.24771	0.347292	1.99211	0.0613522
chrX	272487	273618	1131	chrX:272487-273618	1.42423	1.26459	0.159638	0.370991	0.322297	2.11327	0.0369504
chrX	278320	279545	1225	chrX:278320-279545	1.70176	1.29949	0.402273	0.379082	0.432731	3.5129	0.000709653
chrX	281010	281319	309	chrX:281010-281319	1.67803	1.55253	0.125505	0.343077	0.27605	0.75813	0.454654
chrX	284200	284623	423	chrX:284200-284623	1.466	0.671326	0.794674	0.398015	0.273714	7.71892	1.89e-09
chrX	285164	285363	199	chrX:285164-285363	1.00176	0.64846	0.353298	0.554494	0.261033	1.99519	0.0556573
chrX	286609	289712	3103	chrX:286609-289712	1.64553	0.819437	0.826095	0.361462	0.338938	9.39843	2.64e-14
chrX	291127	291353	226	chrX:291127-291353	1.62336	0.893182	0.730182	0.44918	0.305139	3.93769	0.000857
chrX	294015	294819	804	chrX:294015-294819	1.02928	0.565404	0.463879	0.419562	0.607607	4.31613	3.9e-05
chrX	296789	297166	377	chrX:296789-297166	1.67223	1.09667	0.575561	0.342608	0.110677	4.32394	0.000144686
chrX	297863	298180	317	chrX:297863-298180	1.59073	0.687677	0.903051	0.484768	0.264246	5.55993	4.39e-06
chrX	299680	300503	823	chrX:299680-300503	1.32093	0.0597822	1.26115	0.685969	0.311661	9.49214	5.7e-15
chrX	302357	303091	734	chrX:302357-303091	1.05157	0.446082	0.605489	0.372598	0.273377	6.64666	4.27e-09
chrX	305924	307037	1113	chrX:305924-307037	1.57294	0.709545	0.863398	0.534496	0.149646	8.67729	3.92e-13
chrX	307893	309178	1285	chrX:307893-309178	1.20252	0.305537	0.896983	0.590838	0.293027	7.79477	2.79e-12
chrX	311796	312101	305	chrX:311796-312101	1.4993	0.520227	0.979076	0.325975	0.411623	7.17415	4.62e-08
chrX	314530	314970	440	chrX:314530-314970	1.58015	1.04521	0.534937	0.353843	0.216288	3.75001	0.000765353
chrX	315739	316555	816	chrX:315739-316555	1.32151	0.465801	0.855706	0.38813	0.282249	7.52055	1.59e-10
chrX	318090	318900	810	chrX:318090-318900	1.44322	0.447538	0.995678	0.65304	0.536254	7.88362	1.75e-11
chrX	319533	319738	205	chrX:319533-319738	1.48264	0.489394	0.993242	0.445702	0.195261	6.37527	3.65e-06
chrX	321424	321630	206	chrX:321424-321630	1.32682	0.786288	0.54053	0.394616	0.182744	3.81815	0.00112365
chrX	327220	327428	208	chrX:327220-327428	1.28727	0.895985	0.391288	0.352116	0.351222	2.41057	0.025892
chrX	340250	342159	1909	chrX:340250-342159	1.59597	1.17049	0.425478	0.459211	0.322241	5.12759	8.9e-07
chrX	343517	344155	638	chrX:343517-344155	1.48151	0.752294	0.729212	0.499133	0.195617	6.9468	1.92e-09
chrX	346227	346635	408	chrX:346227-346635	1.6912	1.34672	0.344481	0.348814	0.383037	2.07747	0.0439991
chrX	350235	350554	319	chrX:350235-350554	1.39236	0.868788	0.523576	0.425182	0.432066	4.7594	2.52e-05
chrX	353538	353791	253	chrX:353538-353791	0.771515	1.92164	-1.15013	0.401048	0.312856	-10.0041	9.36e-11
chrX	356581	358541	1960	chrX:356581-358541	1.2445	1.13549	0.109002	0.280416	0.322087	1.82145	0.070381
chrX	360352	360573	221	chrX:360352-360573	1.17118	0.711591	0.459591	0.362013	0.295717	2.86868	0.010745
chrX	363209	363998	789	chrX:363209-363998	-0.342651	1.59005	-1.9327	0.353253	0.331514	-18.5819	2.4e-34
chrX	366263	366632	369	chrX:366263-366632	1.50673	1.40606	0.100667	0.378223	0.437598	0.883606	0.381939
chrX	370641	370850	209	chrX:370641-370850	1.2243	0.896237	0.328066	0.41	0.337443	2.20277	0.0352857
chrX	372089	372308	219	chrX:372089-372308	1.27545	0.976326	0.299129	0.325618	0.397612	1.8868	0.0747125
chrX	375057	376094	1037	chrX:375057-376094	1.26155	0.690663	0.570883	0.42201	0.235557	6.72192	2.1e-09
chrX	377964	378705	741	chrX:377964-378705	1.76651	0.548512	1.21799	0.533545	0.14281	11.38	7.77e-18
chrX	380128	381786	1658	chrX:380128-381786	0.96723	0.89204	0.0751899	0.385426	0.620569	0.774982	0.439934
chrX	391514	391749	235	chrX:391514-391749	1.24921	1.07384	0.175374	0.336036	0.32379	1.57265	0.126188
chrX	399129	399328	199	chrX:399129-399328	1.18218	0.748737	0.433444	0.305613	0.511575	3.45153	0.00173491
chrX	404671	404898	227	chrX:404671-404898	1.18609	1.06273	0.123364	0.472458	0.395576	0.549173	0.590905
chrX	406975	407731	756	chrX:406975-407731	0.99587	0.904697	0.0911731	0.282964	0.448195	1.04404	0.299965
chrX	412043	412296	253	chrX:412043-412296	1.00555	0.862222	0.143323	0.636724	0.500315	0.632547	0.531734
chrX	416759	418325	1566	chrX:416759-418325	1.35645	0.937708	0.418746	0.425272	0.388839	5.05033	1.46e-06
chrX	426159	426450	291	chrX:426159-426450	1.60973	0.638864	0.970864	0.671655	0.365045	5.80697	8.17e-07
chrX	433326	433575	249	chrX:433326-433575	1.53503	0.790985	0.744046	0.379837	0.243454	4.63986	6.4e-05
chrX	434919	435404	485	chrX:434919-435404	1.58256	1.24689	0.33567	0.413944	0.319693	2.14408	0.0366927
chrX	436409	437376	967	chrX:436409-437376	1.36536	1.18519	0.180174	0.336552	0.336908	2.53784	0.0125838
chrX	444723	444986	263	chrX:444723-444986	2.47626	2.13217	0.344091	0.585261	0.917588	1.81661	0.0781066
chrX	453356	453557	201	chrX:453356-453557	0.943394	0.32553	0.617863	0.348295	0.147081	4.35708	0.000139029
chrX	454996	455353	357	chrX:454996-455353	1.13598	0.144508	0.99147	0.288855	0.518158	7.21048	1.75e-08
chrX	471814	472166	352	chrX:471814-472166	1.26541	0.854849	0.410561	0.373923	0.222929	3.49935	0.00117153
chrX	474903	475136	233	chrX:474903-475136	1.38209	1.59331	-0.211217	0.30045	0.448275	-1.54788	0.131866
chrX	481039	481238	199	chrX:481039-481238	1.22339	0.84202	0.381374	0.271199	0.556279	2.92598	0.00678953
chrX	487784	488067	283	chrX:487784-488067	1.45036	0.99702	0.453343	0.232861	0.468976	3.0535	0.00477887
chrX	499626	501490	1864	chrX:499626-501490	0.572718	0.159749	0.412969	0.505055	0.408152	5.04694	9.9e-07
chrX	504216	505430	1214	chrX:504216-505430	0.558934	0.194828	0.364106	0.503932	0.819592	3.71835	0.000309132
chrX	507883	508422	539	chrX:507883-508422	-0.301758	-0.274268	-0.0274898	0.236495	0.250882	-0.25126	0.802668
chrX	510377	516489	6112	chrX:510377-516489	-0.125435	-0.246431	0.120996	0.450705	0.406768	2.09663	0.0365604
chrX	518339	518580	241	chrX:518339-518580	0.0320202	-0.203813	0.235833	0.535577	0.673286	1.64304	0.115565
chrX	520209	520464	255	chrX:520209-520464	0.367508	0.275455	0.092053	0.3793	0.650361	0.71536	0.477342
chrX	522737	523540	803	chrX:522737-523540	0.611596	0.144621	0.466975	0.481201	0.530819	4.29701	4.18e-05
chrX	524737	526530	1793	chrX:524737-526530	0.581768	0.137328	0.44444	0.431471	0.237815	5.18927	5.5e-07
chrX	530086	531565	1479	chrX:530086-531565	1.44676	1.14384	0.302923	0.304599	0.398159	3.71558	0.000300441
chrX	542762	543247	485	chrX:542762-543247	1.33613	0.778909	0.557218	0.333158	0.360449	4.62829	2.79e-05
chrX	544496	544961	465	chrX:544496-544961	1.12258	1.11888	0.00370292	0.330794	0.229522	0.0251573	0.980039
chrX	547687	547978	291	chrX:547687-547978	1.22079	0.695253	0.525535	0.386226	0.180427	4.96765	3.05e-05
chrX	551522	551747	225	chrX:551522-551747	0.655273	0.257929	0.397343	0.47776	0.412487	2.56687	0.0153788
chrX	553076	553343	267	chrX:553076-553343	1.69106	1.60235	0.0887121	0.486499	0.330717	0.573364	0.570535
chrX	556750	557073	323	chrX:556750-557073	1.2418	0.703049	0.538746	0.438799	0.218878	3.66524	0.000693685
chrX	558032	558358	326	chrX:558032-558358	0.060393	1.88811	-1.82771	0.398011	0.35862	-17.4877	4.4e-18
chrX	559936	560298	362	chrX:559936-560298	1.431	0.904204	0.526795	0.486283	0.253047	3.61612	0.000796003
chrX	564362	564583	221	chrX:564362-564583	0.948091	0.802424	0.145667	0.238837	0.186262	1.03999	0.315019
chrX	567089	567354	265	chrX:567089-567354	1.29233	0.973384	0.31895	0.191614	0.290801	1.75517	0.0916554
chrX	573579	573804	225	chrX:573579-573804	0.27911	1.53341	-1.2543	0.240514	0.333192	-12.9613	7.32e-12
chrX	575463	575942	479	chrX:575463-575942	0.320319	1.92691	-1.60659	0.274741	0.326973	-19.4329	4.17e-30
chrX	579158	579357	199	chrX:579158-579357	0.530242	0.593535	-0.0632931	0.432442	0.440356	-0.407631	0.686353
chrX	597302	597511	209	chrX:597302-597511	1.39388	0.966843	0.427035	0.275966	0.205326	5.13127	1.54e-05
chrX	602075	602333	258	chrX:602075-602333	1.08899	2.09705	-1.00806	0.336586	0.472808	-4.73548	4.14e-05
chrX	608765	609140	375	chrX:608765-609140	1.21062	1.13591	0.0747091	0.378084	0.775613	0.552585	0.582986
chrX	610160	611071	911	chrX:610160-611071	1.66789	1.4039	0.263989	0.56348	0.162823	2.11481	0.0368602
chrX	615328	615551	223	chrX:615328-615551	1.28224	0.735404	0.546838	0.305672	0.340374	5.09921	1.62e-05
chrX	620474	620705	231	chrX:620474-620705	1.49418	1.18894	0.305242	0.409066	0.223293	1.76959	0.0944853
chrX	634568	634836	268	chrX:634568-634836	1.19867	0.733889	0.464778	0.50102	0.475976	2.89677	0.00690915
chrX	647955	648310	355	chrX:647955-648310	1.21809	1.16511	0.0529773	0.291225	0.252849	0.366944	0.715562
chrX	654348	654547	199	chrX:654348-654547	1.26824	1.14169	0.12655	0.646221	0.567492	0.641188	0.526388
chrX	662023	662829	806	chrX:662023-662829	0.702727	0.846944	-0.144217	0.272209	0.367957	-1.27346	0.206278
chrX	665707	665919	212	chrX:665707-665919	1.60327	0.87803	0.725242	0.494405	0.541873	3.32419	0.00339649
chrX	670682	671997	1315	chrX:670682-671997	0.737916	0.685117	0.0527994	0.313061	0.268633	0.583047	0.560834
chrX	674076	674449	373	chrX:674076-674449	1.67703	1.24096	0.436071	0.31385	0.310683	3.59612	0.00121873
chrX	697553	697904	351	chrX:697553-697904	1.16616	0.711856	0.454303	0.369649	0.282453	3.79653	0.000485921
chrX	700638	701319	681	chrX:700638-701319	1.38361	1.06692	0.316691	0.417376	0.402487	3.42295	0.00100846
chrX	719364	719566	202	chrX:719364-719566	1.69891	1.55864	0.140273	0.207672	0.349846	0.788269	0.459332
chrX	723938	724492	554	chrX:723938-724492	1.0775	0.584716	0.492784	0.27983	0.346334	3.79099	0.000478054
chrX	742060	742265	205	chrX:742060-742265	1.23755	1.35629	-0.118742	0.345822	0.280735	-0.823475	0.420024
chrX	747371	747714	343	chrX:747371-747714	0.645545	0.657121	-0.0115757	0.29833	0.425565	-0.0861714	0.931888
chrX	748330	748555	225	chrX:748330-748555	1.29442	1.43366	-0.139237	0.302387	0.361756	-1.13094	0.266758
chrX	754776	755023	247	chrX:754776-755023	0.90697	0.536262	0.370707	0.314457	0.390949	2.13651	0.0407886
chrX	764842	765240	398	chrX:764842-765240	1.35876	0.9395	0.419264	0.283119	0.310804	3.86336	0.000318435
chrX	784030	784229	199	chrX:784030-784229	1.15927	1.05631	0.102959	0.393653	0.153981	0.902967	0.376186
chrX	786565	786977	412	chrX:786565-786977	1.57332	1.33023	0.243091	0.452664	0.168082	1.81986	0.0761181
chrX	792126	792344	218	chrX:792126-792344	1.31324	0.985783	0.32746	0.33349	0.599726	2.16545	0.0382632
chrX	793507	793746	239	chrX:793507-793746	1.25224	1.50152	-0.249273	0.265251	0.22289	-1.87669	0.0700066
chrX	796862	797593	731	chrX:796862-797593	1.16936	1.10902	0.0603389	0.371996	0.170859	0.684494	0.495709
chrX	800176	801418	1242	chrX:800176-801418	1.25752	1.47946	-0.221946	0.270446	0.512704	-2.02313	0.0460207
chrX	821670	822012	342	chrX:821670-822012	1.37777	1.23097	0.146807	0.315484	0.424324	1.31809	0.194808
chrX	826916	827135	219	chrX:826916-827135	1.52712	1.51586	0.0112627	0.332028	0.849807	0.0569599	0.955028
chrX	839332	839719	387	chrX:839332-839719	1.63434	1.58485	0.0494951	0.423839	0.846275	0.30585	0.761113
chrX	840402	840621	219	chrX:840402-840621	-0.237273	1.58028	-1.81755	0.211161	0.395504	-12.8291	1.33e-16
chrX	841733	841932	199	chrX:841733-841932	0.760879	0.90601	-0.145131	0.35389	0.208957	-0.653332	0.521403
chrX	847470	847971	501	chrX:847470-847971	1.55858	1.21353	0.345051	0.356471	0.247536	3.33211	0.00159149
chrX	853882	854243	361	chrX:853882-854243	1.24323	0.870227	0.373	0.522039	0.289488	2.39547	0.0211532
chrX	860429	860874	445	chrX:860429-860874	1.17191	1.24976	-0.0778446	0.290411	0.890427	-0.472098	0.639707
chrX	863183	863419	236	chrX:863183-863419	0.724455	0.141098	0.583356	0.431943	0.37371	2.84017	0.0101242
chrX	883434	883803	369	chrX:883434-883803	1.5445	1.13617	0.408326	0.302391	0.364515	3.02128	0.0042806
chrX	886422	886644	222	chrX:886422-886644	1.41721	1.50667	-0.0894545	0.278015	0.189871	-0.712721	0.4816
chrX	889775	889974	199	chrX:889775-889974	0.727909	1.1278	-0.399894	0.326353	0.45072	-2.03949	0.0566028
chrX	890572	890889	317	chrX:890572-890889	1.59497	1.66091	-0.0659394	0.338606	0.395936	-0.419384	0.677847
chrX	893737	893956	219	chrX:893737-893956	1.36868	0.547576	0.821106	0.416529	0.260586	5.77421	2.21e-05
chrX	904732	905013	281	chrX:904732-905013	1.33432	0.687045	0.647273	0.395121	0.316837	4.79603	2.12e-05
chrX	910297	910576	279	chrX:910297-910576	1.56864	2.05985	-0.491212	0.401171	0.338281	-3.23751	0.00320098
chrX	912249	912992	743	chrX:912249-912992	1.40418	0.461948	0.942234	0.500468	0.199413	9.0592	1.19e-13
chrX	915512	916302	790	chrX:915512-916302	1.44634	1.35335	0.0929886	0.333452	0.212631	1.01524	0.313018
chrX	947425	947654	229	chrX:947425-947654	1.1443	1.32919	-0.184889	0.234671	0.361587	-1.51029	0.142765
chrX	949811	950194	383	chrX:949811-950194	0.0489485	1.8208	-1.77185	0.43115	0.295208	-18.6784	9.44e-19
chrX	957514	958251	737	chrX:957514-958251	1.17461	0.839621	0.334989	0.448011	0.241975	3.4475	0.000937152
chrX	1019844	1020611	767	chrX:1019844-1020611	1.32113	0.840281	0.480849	0.352664	0.338976	5.88218	1.06e-07
chrX	1037353	1038136	783	chrX:1037353-1038136	1.05385	0.469124	0.584724	0.384591	0.184921	6.94659	4.44e-10
chrX	1039299	1039502	203	chrX:1039299-1039502	0.334053	1.6478	-1.31375	0.372547	0.283566	-9.24714	5.89e-10
chrX	1040201	1040490	289	chrX:1040201-1040490	1.16964	1.43712	-0.267485	0.55414	0.212523	-1.09008	0.313531
chrX	1049625	1050015	390	chrX:1049625-1050015	1.28087	1.30088	-0.0200062	0.354266	0.736547	-0.175916	0.861107
chrX	1113288	1114071	783	chrX:1113288-1114071	1.00725	0.608996	0.398254	0.351207	0.269147	4.67446	1.17e-05
chrX	1115233	1115436	203	chrX:1115233-1115436	1.19336	1.4047	-0.211333	0.317117	0.298527	-1.68326	0.108126
chrX	1116084	1116479	395	chrX:1116084-1116479	1.37991	0.779318	0.600591	0.755407	0.175167	2.42582	0.0293113
chrX	1125681	1126071	390	chrX:1125681-1126071	1.32173	1.16206	0.159663	0.33597	0.358871	1.12567	0.267129
chrX	1135952	1136169	217	chrX:1135952-1136169	0.657121	1.84273	-1.18561	0.149651	0.300787	-10.2843	2.68e-10
chrX	1137099	1137436	337	chrX:1137099-1137436	1.62332	1.01034	0.612977	0.325599	0.115151	5.84259	6.86e-07
chrX	1143356	1143568	212	chrX:1143356-1143568	1.45391	1.63583	-0.181924	0.292283	0.316393	-1.29001	0.207501
chrX	1144766	1144987	221	chrX:1144766-1144987	0.836061	1.61697	-0.780909	0.283785	0.137305	-7.2733	2.71e-08
chrX	1327451	1328260	809	chrX:1327451-1328260	0.393192	0.3017	0.0914916	0.294222	0.447776	0.708868	0.480597
chrX	1347656	1347954	298	chrX:1347656-1347954	0.692364	0.95601	-0.263646	0.372093	0.447775	-1.93864	0.0616972
chrX	1367530	1367769	239	chrX:1367530-1367769	1.24042	0.641313	0.599111	0.35632	0.495138	4.18709	0.000240412
chrX	1373119	1373545	426	chrX:1373119-1373545	1.38787	0.522515	0.865357	0.446426	0.247456	6.54078	4.13e-08
chrX	1374308	1376481	2173	chrX:1374308-1376481	1.05734	1.17177	-0.11443	0.613584	0.408387	-1.00583	0.31736
chrX	1379425	1379771	346	chrX:1379425-1379771	1.31491	1.30108	0.0138295	0.350443	0.136535	0.101285	0.919818
chrX	1382752	1382987	235	chrX:1382752-1382987	1.38873	0.782778	0.605949	0.277378	0.418585	4.01204	0.000369086
chrX	1384170	1384442	272	chrX:1384170-1384442	1.61139	0.95101	0.660384	0.399246	0.281008	5.52902	6.13e-06
chrX	1391471	1391678	207	chrX:1391471-1391678	1.82645	1.86394	-0.0374849	0.321791	0.24226	-0.270529	0.789535
chrX	1420545	1420843	298	chrX:1420545-1420843	1.24918	0.457083	0.792098	0.404766	0.432682	7.25756	6.78e-09
chrX	1424682	1424893	211	chrX:1424682-1424893	1.21273	0.841591	0.371136	0.236165	0.36747	3.18948	0.00509905
chrX	1430935	1431534	599	chrX:1430935-1431534	1.4425	0.177854	1.26465	0.56077	0.253499	10.4261	2.46e-15
chrX	1446558	1446905	347	chrX:1446558-1446905	1.9785	0.336818	1.64168	0.620111	0.345822	6.11111	6e-06
chrX	1457462	1457776	314	chrX:1457462-1457776	1.11558	0.360656	0.754919	0.496394	0.183664	5.20151	1.81e-05
chrX	1464107	1466533	2426	chrX:1464107-1466533	1.55628	0.659418	0.896865	0.591621	0.18806	13.0149	7.08e-30
chrX	1468091	1468662	571	chrX:1468091-1468662	1.94842	0.564949	1.38347	0.593229	0.408314	9.99292	1.66e-14
chrX	1470370	1471916	1546	chrX:1470370-1471916	0.624176	0.122478	0.501699	0.52846	0.419302	6.03032	9.36e-09
chrX	1476025	1476268	243	chrX:1476025-1476268	0.302929	1.8622	-1.55927	0.366424	0.534128	-6.90148	2.1e-07
chrX	1480162	1480376	214	chrX:1480162-1480376	1.47491	0.851818	0.623091	0.29827	0.390208	2.92818	0.0206476
chrX	1491549	1492504	955	chrX:1491549-1492504	1.36044	0.364978	0.995463	0.542154	0.323782	9.26111	1.72e-13
chrX	1494101	1494346	245	chrX:1494101-1494346	1.29032	0.879015	0.411303	0.305977	0.546537	2.5609	0.020411
chrX	1496876	1497090	214	chrX:1496876-1497090	1.57164	1.31409	0.257546	0.416116	0.128712	1.53911	0.146772
chrX	1497752	1498149	397	chrX:1497752-1498149	1.55633	0.257212	1.29912	0.632561	0.397509	9.43527	1.9e-12
chrX	1498659	1498867	208	chrX:1498659-1498867	1.35059	0.258977	1.09161	0.64999	0.45207	4.90426	0.000129455
chrX	1500480	1500813	333	chrX:1500480-1500813	1.89139	1.67609	0.215308	0.449673	0.429037	1.47656	0.150736
chrX	1506577	1507122	545	chrX:1506577-1507122	1.61202	0.238902	1.37312	0.747934	0.440791	7.61839	7.58e-09
chrX	1510975	1511469	494	chrX:1510975-1511469	1.29373	0.235455	1.05827	0.58419	0.0908673	7.18122	1.88e-08
chrX	1513701	1514223	522	chrX:1513701-1514223	1.33018	0.501187	0.828995	0.388378	0.577422	7.24385	8.96e-10
chrX	1517809	1518464	655	chrX:1517809-1518464	1.57232	0.209556	1.36277	0.638352	0.510945	10.8218	1.83e-16
chrX	1521883	1522877	994	chrX:1521883-1522877	1.41251	1.5261	-0.113598	0.466952	0.276556	-1.35313	0.179242
chrX	1531500	1533456	1956	chrX:1531500-1533456	0.605192	0.133653	0.471539	0.623065	0.187884	5.33401	2.66e-07
chrX	1541763	1542142	379	chrX:1541763-1542142	0.869236	0.652	0.217236	0.304022	0.355327	2.25106	0.0292635
chrX	1543750	1546449	2699	chrX:1543750-1546449	1.09595	0.137521	0.958431	0.511606	0.326029	11.0589	3.05e-23
chrX	1547440	1547643	203	chrX:1547440-1547643	0.466273	0.187727	0.278546	0.35934	0.559451	1.52532	0.146027
chrX	1560681	1561044	363	chrX:1560681-1561044	-0.199508	-0.0672348	-0.132273	0.244058	0.438894	-1.05569	0.294311
chrX	1572469	1572823	354	chrX:1572469-1572823	0.784073	0.543364	0.240709	0.434872	0.549704	1.70785	0.0935172
chrX	1581318	1581521	203	chrX:1581318-1581521	0.707879	0.559242	0.148636	0.342983	0.406526	1.13224	0.267327
chrX	1584056	1584255	199	chrX:1584056-1584255	0.832727	0.389773	0.442955	0.369863	0.346495	1.96222	0.0645571
chrX	1586224	1587011	787	chrX:1586224-1587011	1.54277	0.491998	1.05077	0.60881	0.491598	9.325	3.81e-14
chrX	1600556	1600766	210	chrX:1600556-1600766	1.61019	0.909596	0.700593	0.40997	0.349112	4.17923	0.000312347
chrX	1614374	1614593	219	chrX:1614374-1614593	-0.110546	-0.238636	0.128091	0.310932	0.542245	0.64139	0.531715
chrX	1615610	1616192	582	chrX:1615610-1616192	-0.534636	-0.318763	-0.215874	0.40583	0.474486	-1.29639	0.201673
chrX	1625666	1625929	263	chrX:1625666-1625929	0.627939	0.779495	-0.151555	0.262164	0.330536	-1.16303	0.257197
chrX	1628120	1628339	219	chrX:1628120-1628339	1.38505	0.994394	0.390651	0.340338	0.174226	3.27546	0.00478536
chrX	1631412	1631621	209	chrX:1631412-1631621	1.06521	0.433384	0.631828	0.301615	0.40698	4.95453	3.12e-05
chrX	1633628	1633868	240	chrX:1633628-1633868	1.07261	0.555909	0.516697	0.367538	0.458015	3.19409	0.00322135
chrX	1649565	1649792	227	chrX:1649565-1649792	-0.257727	0.0386868	-0.296414	0.304585	1.07429	-1.16411	0.25964
chrX	1661917	1662352	435	chrX:1661917-1662352	0.366621	1.54885	-1.18223	0.280802	0.561424	-8.97336	2.14e-13
chrX	1670178	1673223	3045	chrX:1670178-1673223	0.896742	0.353886	0.542856	0.513876	0.462587	6.56496	2.96e-10
chrX	1673876	1675119	1243	chrX:1673876-1675119	1.32646	0.909287	0.417175	0.444468	0.232235	4.86006	3.51e-06
chrX	1675627	1676186	559	chrX:1675627-1676186	1.39335	0.770884	0.622465	0.548029	0.31369	5.44221	1.05e-06
chrX	1676938	1681072	4134	chrX:1676938-1681072	1.47931	0.383755	1.09555	0.613646	0.102469	19.108	1.07e-59
chrX	1693758	1694253	495	chrX:1693758-1694253	1.49297	1.06326	0.429712	0.360668	0.287533	4.34561	5.65e-05
chrX	1701904	1702103	199	chrX:1701904-1702103	1.14373	0.0927272	1.051	0.563238	0.28236	5.55785	3.67e-05
chrX	1702840	1703308	468	chrX:1702840-1703308	1.08442	0.498838	0.585586	0.483633	0.360688	3.52427	0.00134954
chrX	1708668	1708870	202	chrX:1708668-1708870	1.44164	1.03648	0.405159	0.178604	0.383517	3.27853	0.0054517
chrX	1737164	1737431	267	chrX:1737164-1737431	0.854667	0.656566	0.198101	0.190669	0.309887	2.05849	0.0485057
chrX	1739007	1739443	436	chrX:1739007-1739443	1.69136	0.720038	0.971326	0.416435	0.378798	8.16115	3.35e-10
chrX	1740692	1741052	360	chrX:1740692-1741052	0.647606	0.0367677	0.610838	0.411256	0.445584	4.09356	0.000299919
chrX	1748213	1748476	263	chrX:1748213-1748476	1.49364	1.06354	0.430101	0.294305	0.192898	3.05242	0.00484801
chrX	1812984	1813263	279	chrX:1812984-1813263	1.53285	1.00369	0.529162	0.442881	0.3559	3.76817	0.000726299
chrX	1843613	1844114	501	chrX:1843613-1844114	0.791091	0.451364	0.339727	0.482733	0.673597	0.943741	0.376241
chrX	1860736	1860951	215	chrX:1860736-1860951	1.07623	1.55616	-0.479929	0.302765	0.651672	-2.96657	0.00394993
chrX	1865601	1865859	258	chrX:1865601-1865859	1.00842	1.19116	-0.182737	0.282726	0.332117	-1.19049	0.243319
chrX	1890289	1890551	262	chrX:1890289-1890551	1.37921	1.51609	-0.136874	0.279905	0.284044	-1.16169	0.256296
chrX	1892709	1892976	267	chrX:1892709-1892976	0.616788	0.500606	0.116182	0.233952	0.139963	0.847509	0.40321
chrX	1939679	1939878	199	chrX:1939679-1939878	0.966818	0.555985	0.410833	0.315125	0.261484	3.05516	0.00626548
chrX	1953143	1953346	203	chrX:1953143-1953346	1.08715	0.829015	0.258136	0.437482	0.223099	1.54439	0.133097
chrX	1964123	1964338	215	chrX:1964123-1964338	1.19379	0.815606	0.378182	0.298864	0.240878	3.08147	0.00433454
chrX	1967313	1967528	215	chrX:1967313-1967528	0.347339	1.60833	-1.26099	0.518211	0.34749	-5.95853	3.3e-05
chrX	1972741	1973894	1153	chrX:1972741-1973894	1.38395	0.951061	0.432894	0.427267	0.239035	4.65194	1.22e-05
chrX	2003986	2004473	487	chrX:2003986-2004473	0.318956	0.419242	-0.100287	0.359082	0.305064	-1.11996	0.266012
chrX	2288770	2288981	211	chrX:2288770-2288981	1.52409	1.59617	-0.0720833	0.610841	0.28254	-0.355012	0.727015
chrX	2298945	2299709	764	chrX:2298945-2299709	1.42486	1.34797	0.0768901	0.577462	0.697468	0.721383	0.472695
chrX	2300355	2300600	245	chrX:2300355-2300600	0.387936	1.96538	-1.57744	0.290317	0.282191	-17.7121	1.5e-16
chrX	2303182	2303381	199	chrX:2303182-2303381	1.16227	1.19409	-0.0318181	0.74857	0.399617	-0.126357	0.901049
chrX	2321549	2321863	314	chrX:2321549-2321863	1.26018	1.17261	0.0875682	0.675762	0.341849	0.565917	0.574863
chrX	2329874	2330095	221	chrX:2329874-2330095	1.42576	2.11545	-0.689697	0.524545	0.877224	-3.98047	0.00071341
chrX	2368944	2369249	305	chrX:2368944-2369249	1.29945	1.22538	0.0740758	0.248506	0.499135	0.691642	0.493031
chrX	2373876	2375166	1290	chrX:2373876-2375166	1.62688	1.45386	0.173019	0.457983	0.462389	2.1184	0.0365829
chrX	2379531	2380898	1367	chrX:2379531-2380898	1.62135	1.4725	0.14885	0.418342	0.503776	1.77017	0.0788711
chrX	2385903	2386146	243	chrX:2385903-2386146	1.56879	1.26694	0.301843	0.383011	0.312147	2.47045	0.0192174
chrX	2391797	2392954	1157	chrX:2391797-2392954	1.45766	1.01966	0.437999	0.383865	0.452654	4.31738	3.67e-05
chrX	2395233	2395542	309	chrX:2395233-2395542	1.42506	1.61808	-0.19302	0.31631	0.19741	-1.75912	0.0884548
chrX	2396486	2397641	1155	chrX:2396486-2397641	1.67732	1.42499	0.252336	0.45298	0.343647	3.05557	0.00283191
chrX	2402765	2403004	239	chrX:2402765-2403004	1.67655	1.52633	0.15022	0.482192	0.507179	0.73882	0.468804
chrX	2406766	2408029	1263	chrX:2406766-2408029	1.62111	1.03994	0.581169	0.459901	0.300214	6.68093	9.02e-10
chrX	2412572	2413090	518	chrX:2412572-2413090	1.41542	1.2992	0.116221	0.296626	0.678115	0.660654	0.51209
chrX	2414503	2415243	740	chrX:2414503-2415243	1.21825	0.774943	0.443307	0.405903	0.171299	6.06187	4.06e-08
chrX	2415930	2419133	3203	chrX:2415930-2419133	1.43091	0.301703	1.1292	0.544901	0.371362	18.2575	6.99e-51
chrX	2420902	2421155	253	chrX:2420902-2421155	1.18764	0.300101	0.887535	0.474191	0.603256	6.13985	8.71e-07
chrX	2423710	2423914	204	chrX:2423710-2423914	1.20973	0.603863	0.605864	0.529791	0.173636	3.08854	0.00587435
chrX	2428243	2429247	1004	chrX:2428243-2429247	0.760711	0.160399	0.600311	0.549199	0.573497	5.96237	2.61e-08
chrX	2455533	2455758	225	chrX:2455533-2455758	0.878606	0.887626	-0.00902022	0.390903	0.350475	-0.0700752	0.944585
chrX	2506287	2506487	200	chrX:2506287-2506487	1.48782	1.59098	-0.103167	0.35238	0.451434	-0.575791	0.571436
chrX	2510078	2510351	273	chrX:2510078-2510351	1.28262	1.40028	-0.117657	0.735433	1.30442	-0.59972	0.554432
chrX	2511351	2512980	1629	chrX:2511351-2512980	0.727497	0.107081	0.620416	0.556887	0.398242	6.92204	7.45e-11
chrX	2536573	2537807	1234	chrX:2536573-2537807	0.48142	0.152955	0.328465	0.481141	0.746746	3.08323	0.00253927
chrX	2618297	2620612	2315	chrX:2618297-2620612	0.261443	0.0320202	0.229423	0.432806	0.568494	2.2293	0.027107
chrX	2622051	2622366	315	chrX:2622051-2622366	1.144	0.652576	0.491424	0.390524	0.340105	3.60614	0.00107739
chrX	2641705	2641925	220	chrX:2641705-2641925	0.0550909	-0.0177271	0.072818	0.297659	0.4953	0.390543	0.700254
chrX	2651531	2651876	345	chrX:2651531-2651876	1.66027	1.19485	0.465424	0.322281	0.304179	3.8927	0.000352625
chrX	2654130	2654545	415	chrX:2654130-2654545	1.30884	0.941939	0.366897	0.33935	0.342054	3.35194	0.00148614
chrX	2661367	2661566	199	chrX:2661367-2661566	1.02027	0.458257	0.562015	0.274334	0.403627	3.17381	0.00516999
chrX	2668830	2669279	449	chrX:2668830-2669279	1.47149	1.31967	0.151824	0.402991	0.29903	1.51364	0.136687
chrX	2675578	2675777	199	chrX:2675578-2675777	0.209829	1.88894	-1.67911	0.414183	0.208734	-12.7545	6.01e-10
chrX	2695327	2695527	200	chrX:2695327-2695527	1.65648	1.76616	-0.109677	0.436685	0.347193	-0.683813	0.49951
chrX	2696231	2697034	803	chrX:2696231-2697034	1.38571	0.924333	0.461376	0.408642	0.371516	3.79959	0.000376905
chrX	2722471	2722721	250	chrX:2722471-2722721	1.36464	0.628258	0.736379	0.480343	0.246347	4.01203	0.000684419
chrX	2724948	2725431	483	chrX:2724948-2725431	1.65529	1.42898	0.226306	0.504053	0.319307	1.20456	0.233759
chrX	2732556	2733367	811	chrX:2732556-2733367	1.39293	0.869375	0.523557	0.452256	0.122967	5.19785	1.64e-06
chrX	2740532	2740741	209	chrX:2740532-2740741	-0.263455	0.0217676	-0.285222	0.28563	0.204874	-1.70762	0.102567
chrX	2756538	2758338	1800	chrX:2756538-2758338	1.27998	0.259373	1.02061	0.631484	0.384821	11.6776	3.05e-24
chrX	2769605	2769804	199	chrX:2769605-2769804	1.08573	1.34856	-0.262833	0.535092	0.273577	-1.26964	0.21879
chrX	2776862	2777114	252	chrX:2776862-2777114	0.988848	0.804066	0.184783	0.481823	0.278952	1.18829	0.243957
chrX	2782974	2783247	273	chrX:2782974-2783247	1.63836	1.82975	-0.191384	0.270587	0.350304	-1.82952	0.0786263
chrX	2787882	2788231	349	chrX:2787882-2788231	1.18586	0.382292	0.803572	0.226323	0.219025	9.34512	9.36e-11
chrX	2789580	2789819	239	chrX:2789580-2789819	1.44479	1.50394	-0.0591515	0.356522	0.373118	-0.382835	0.705193
chrX	2809018	2809615	597	chrX:2809018-2809615	1.4126	1.65633	-0.243734	0.300689	0.253989	-1.5882	0.116809
chrX	2810537	2810814	277	chrX:2810537-2810814	1.55245	2.1646	-0.612146	0.222867	0.489789	-4.19993	0.0002623
chrX	2835306	2836035	729	chrX:2835306-2836035	1.66277	0.508598	1.15417	0.547623	0.25664	11.2746	1.85e-18
chrX	2837783	2838147	364	chrX:2837783-2838147	1.25155	0.685644	0.565902	0.442192	0.535335	4.63467	3.53e-05
chrX	2845821	2846418	597	chrX:2845821-2846418	1.16017	0.149066	1.0111	0.452564	0.263095	10.1649	9.33e-15
chrX	2854954	2855248	294	chrX:2854954-2855248	1.09985	0.58995	0.509899	0.313309	0.413599	2.58791	0.0146826
chrX	2856093	2857600	1507	chrX:2856093-2857600	0.772418	0.154732	0.617686	0.627191	0.296269	6.9631	8.27e-11
chrX	2861637	2861836	199	chrX:2861637-2861836	1.09285	0.341818	0.75103	0.243676	0.25384	7.1485	6.52e-08
chrX	2866021	2866413	392	chrX:2866021-2866413	1.13291	0.192235	0.940674	0.530845	0.431916	6.38247	3.38e-07
chrX	2877337	2877536	199	chrX:2877337-2877536	1.29709	1.11816	0.178934	0.429259	0.427938	1.11674	0.274038
chrX	2883395	2883636	241	chrX:2883395-2883636	1.10376	0.643434	0.460323	0.266153	0.255352	3.07793	0.00435205
chrX	2886329	2886537	208	chrX:2886329-2886537	1.26167	0.998283	0.263384	0.187524	0.0628338	2.98129	0.00618965
chrX	2895692	2896523	831	chrX:2895692-2896523	1.12964	0.677813	0.451824	0.351188	0.237518	5.73407	1.56e-07
chrX	2941005	2941408	403	chrX:2941005-2941408	1.4125	1.22409	0.188409	0.39674	0.229657	1.53057	0.133408
chrX	2942963	2943241	278	chrX:2942963-2943241	1.61808	2.34608	-0.727999	0.301004	0.46387	-6.91558	5.4e-08
chrX	2955308	2955513	205	chrX:2955308-2955513	1.19512	1.21333	-0.0182121	0.326822	0.500647	-0.143555	0.886831
chrX	2957293	2957562	269	chrX:2957293-2957562	0.637576	0.406616	0.23096	0.339325	0.366612	1.71672	0.0961467
chrX	3004563	3004812	249	chrX:3004563-3004812	0.948727	0.466136	0.482591	0.369564	0.327048	3.27579	0.00384826
chrX	3012254	3012459	205	chrX:3012254-3012459	1.76715	1.83687	-0.0697171	0.36689	0.222762	-0.488524	0.628884
chrX	3033929	3034368	439	chrX:3033929-3034368	1.17287	1.24294	-0.0700667	0.29183	0.131383	-0.604008	0.548974
chrX	3038079	3038278	199	chrX:3038079-3038278	1.06436	0.34197	0.722394	0.357501	0.362486	4.20852	0.000436269
chrX	3237850	3239667	1817	chrX:3237850-3239667	1.67991	0.970897	0.709017	0.429378	0.363206	9.69098	2.87e-18
chrX	3245012	3246077	1065	chrX:3245012-3246077	1.19255	0.148209	1.04434	0.500612	0.453786	11.7984	1.05e-21
chrX	3271570	3272053	483	chrX:3271570-3272053	0.787667	0.110934	0.676732	0.389639	0.33975	5.66753	4.42e-07
chrX	3273195	3275426	2231	chrX:3273195-3275426	0.494166	-0.0717984	0.565964	0.49578	0.38516	7.11044	1.55e-11
chrX	3295539	3295741	202	chrX:3295539-3295741	0.750682	2.00336	-1.25268	0.433164	0.260928	-6.89859	1.74e-07
chrX	3363817	3364404	587	chrX:3363817-3364404	1.21952	0.291111	0.928404	0.539354	0.326348	7.91705	1.21e-10
chrX	3502776	3502975	199	chrX:3502776-3502975	1.48678	1.84129	-0.354508	0.292045	0.493966	-2.88791	0.00703361
chrX	3540218	3540473	255	chrX:3540218-3540473	1.60812	1.79394	-0.185818	0.201088	0.256663	-1.58907	0.122739
chrX	3543763	3544620	857	chrX:3543763-3544620	1.15201	1.26063	-0.108614	0.38982	0.204692	-1.16557	0.247108
chrX	3560284	3560517	233	chrX:3560284-3560517	1.32991	0.877424	0.452485	0.52764	0.277209	2.6067	0.0194083
chrX	3568317	3568637	320	chrX:3568317-3568637	1.40286	0.669848	0.733015	0.299707	0.629915	5.38704	3.02e-06
chrX	3569755	3569999	244	chrX:3569755-3569999	1.28682	1.09439	0.192424	0.298328	0.492491	1.2259	0.236893
chrX	3583202	3583599	397	chrX:3583202-3583599	1.70111	0.650985	1.05013	0.388209	0.50554	6.40545	1.08e-07
chrX	3602648	3602948	300	chrX:3602648-3602948	1.65027	1.2572	0.393076	0.412641	0.267475	3.05548	0.00389961
chrX	3610039	3610270	231	chrX:3610039-3610270	1.67503	0.951856	0.723174	0.322837	0.437722	4.3145	0.000157623
chrX	3634644	3634843	199	chrX:3634644-3634843	1.46355	0.96447	0.499076	0.516108	0.289469	2.96584	0.00828046
chrX	3639588	3642079	2491	chrX:3639588-3642079	0.733921	0.222955	0.510967	0.423398	0.694571	7.57831	8.02e-13
chrX	3642694	3643594	900	chrX:3642694-3643594	1.22473	0.389781	0.834946	0.427266	0.302839	8.9329	5.41e-14
chrX	3664636	3664841	205	chrX:3664636-3664841	1.13515	0.652879	0.482273	0.304103	0.297936	4.35162	0.000137916
chrX	4535023	4535224	201	chrX:4535023-4535224	1.69336	1.19447	0.498894	0.240091	0.419737	3.07034	0.00807798
chrX	5820822	5821598	776	chrX:5820822-5821598	1.30492	1.39794	-0.0930152	0.457307	0.308982	-0.979425	0.33021
chrX	5826533	5826746	213	chrX:5826533-5826746	1.23091	0.836061	0.394848	0.347064	0.290903	3.48754	0.00148171
chrX	5831027	5831890	863	chrX:5831027-5831890	1.4551	0.882988	0.572113	0.440465	0.256685	6.43748	4.85e-09
chrX	6115430	6115725	295	chrX:6115430-6115725	1.55424	0.281894	1.27235	0.856535	0.107712	5.89015	5.52e-06
chrX	6153970	6156018	2048	chrX:6153970-6156018	-0.134268	-0.218674	0.084406	0.532588	1.2819	0.759173	0.448871
chrX	6156600	6157176	576	chrX:6156600-6157176	0.985959	0.0633839	0.922576	0.308145	0.452999	6.91544	1.93e-08
chrX	6350600	6350841	241	chrX:6350600-6350841	1.40091	1.15682	0.244091	0.218827	0.33278	2.11225	0.051336
chrX	6360092	6360291	199	chrX:6360092-6360291	0.602364	0.490985	0.111379	0.285226	0.28185	0.879234	0.389742
chrX	6461995	6462766	771	chrX:6461995-6462766	1.54042	0.651313	0.889111	0.659788	0.19507	4.75966	5.65e-05
chrX	6707033	6707236	203	chrX:6707033-6707236	0.80505	1.23871	-0.433662	0.373093	0.357555	-2.9878	0.00532873
chrX	6735492	6735699	207	chrX:6735492-6735699	1.30682	0.492651	0.814167	0.252934	0.554232	5.33608	0.000100133
chrX	6777049	6777344	295	chrX:6777049-6777344	1.04611	0.618068	0.428045	0.89927	0.449612	2.29379	0.0293725
chrX	6860219	6860454	235	chrX:6860219-6860454	1.11739	0.664545	0.452848	0.31082	0.478908	1.54911	0.131615
chrX	6914366	6914565	199	chrX:6914366-6914565	0.455808	1.69246	-1.23665	0.238996	0.32072	-8.71455	1.87e-09
chrX	6997126	6997331	205	chrX:6997126-6997331	0.896237	1.36889	-0.472652	0.464738	0.315632	-2.92883	0.0060391
chrX	7005226	7005425	199	chrX:7005226-7005425	1.52158	0.86702	0.654556	0.372622	0.279211	6.41812	5.04e-07
chrX	7010379	7010593	214	chrX:7010379-7010593	1.63209	1.56314	0.0689471	0.282422	0.317763	0.362489	0.720964
chrX	7033625	7033832	207	chrX:7033625-7033832	1.09261	1.33333	-0.240727	0.385103	0.362621	-1.76852	0.0872544
chrX	7037315	7037550	235	chrX:7037315-7037550	0.295909	0.405151	-0.109242	0.503048	0.523737	-0.558351	0.582804
chrX	7075554	7076877	1323	chrX:7075554-7076877	0.308058	-0.0755303	0.383589	0.476833	0.457293	3.89764	0.000152909
chrX	7261991	7262201	210	chrX:7261991-7262201	1.24055	1.43091	-0.190363	0.415514	0.303329	-1.28367	0.214409
chrX	7277945	7278167	222	chrX:7277945-7278167	-0.308121	1.33687	-1.64499	0.255641	0.186214	-14.5804	1.26e-23
chrX	7357556	7357791	235	chrX:7357556-7357791	0.113705	1.43364	-1.31993	0.33507	0.296659	-9.11117	7.5e-05
chrX	7770730	7772170	1440	chrX:7770730-7772170	1.4401	0.897229	0.542874	0.557737	0.313705	4.28189	5.73e-05
chrX	7830011	7830260	249	chrX:7830011-7830260	1.33582	1.20159	0.134227	0.298156	0.379598	1.26707	0.214596
chrX	7855002	7855963	961	chrX:7855002-7855963	0.268073	0.0089697	0.259103	0.502571	0.579657	2.1613	0.0329755
chrX	8094485	8094694	209	chrX:8094485-8094694	0.476237	1.5597	-1.08346	0.384982	0.318771	-6.29374	9.2e-07
chrX	8098119	8098911	792	chrX:8098119-8098911	1.77864	0.75101	1.02763	0.681418	0.308978	5.00804	4.37e-05
chrX	8393280	8394565	1285	chrX:8393280-8394565	1.68413	1.1887	0.49543	0.518898	0.304738	3.23482	0.00225959
chrX	8612671	8612870	199	chrX:8612671-8612870	0.194828	1.33626	-1.14143	0.330951	0.304091	-10.2726	9.19e-13
chrX	8658352	8660834	2482	chrX:8658352-8660834	0.384295	0.0272697	0.357025	0.519555	0.747009	4.46825	1.23e-05
chrX	8711157	8712663	1506	chrX:8711157-8712663	1.2953	0.532899	0.762404	0.552634	0.474811	9.60407	1.96e-17
chrX	8729091	8729608	517	chrX:8729091-8729608	1.58267	0.383515	1.19916	0.529967	0.358231	8.64718	1.22e-11
chrX	8961635	8962294	659	chrX:8961635-8962294	1.21156	0.365997	0.845563	0.579883	0.243655	6.98416	2.72e-09
chrX	9072743	9073016	273	chrX:9072743-9073016	0.764545	1.23737	-0.472822	0.362924	0.259906	-3.04812	0.00628053
chrX	9114467	9114854	387	chrX:9114467-9114854	1.14829	1.18103	-0.0327394	0.297594	0.211747	-0.373951	0.709941
chrX	9117442	9117643	201	chrX:9117442-9117643	1.09991	1.48455	-0.38464	0.333743	0.209037	-2.73161	0.00941897
chrX	9134373	9134582	209	chrX:9134373-9134582	1.71462	1.24947	0.465152	0.355098	0.448141	2.92964	0.0079349
chrX	9135257	9135532	275	chrX:9135257-9135532	0.343909	0.230606	0.113303	0.288874	0.168336	0.975223	0.337015
chrX	9152531	9152742	211	chrX:9152531-9152742	1.29085	1.4347	-0.143848	0.298899	0.542046	-1.04796	0.305816
chrX	9217577	9217806	229	chrX:9217577-9217806	1.03373	0.962803	0.0709244	0.36669	0.177031	0.338323	0.738784
chrX	9219655	9220148	493	chrX:9219655-9220148	0.367576	0.414091	-0.0465151	0.413862	0.231293	-0.42367	0.673321
chrX	9220710	9221579	869	chrX:9220710-9221579	0.302717	0.285253	0.0174646	0.311055	0.367673	0.17068	0.864841
chrX	9246953	9247171	218	chrX:9246953-9247171	1.40412	0.85298	0.551141	0.265445	0.335743	4.8228	3.7e-05
chrX	9262282	9262481	199	chrX:9262282-9262481	0.962803	1.79235	-0.829546	0.521968	0.476974	-3.72833	0.00120312
chrX	9270708	9271446	738	chrX:9270708-9271446	0.675295	0.216648	0.458648	0.41845	0.22885	4.82343	6.17e-06
chrX	9280810	9281013	203	chrX:9280810-9281013	-0.651757	-0.524091	-0.127667	0.419371	0.698228	-0.572035	0.573396
chrX	9301650	9301849	199	chrX:9301650-9301849	1.36889	1.9828	-0.613914	0.457945	0.667579	-3.61486	0.00132718
chrX	9322278	9322507	229	chrX:9322278-9322507	0.903773	0.251136	0.652636	0.284169	0.117643	4.64674	0.000408304
chrX	9342574	9342775	201	chrX:9342574-9342775	1.47155	1.33178	0.139765	0.443564	0.190239	0.746151	0.465154
chrX	9371042	9371742	700	chrX:9371042-9371742	0.232185	2.03635	-1.80417	0.355028	0.390626	-15.4913	8.75e-23
chrX	9391031	9391370	339	chrX:9391031-9391370	-0.103502	-0.521894	0.418392	0.40725	0.639711	3.31596	0.00154832
chrX	9392058	9394633	2575	chrX:9392058-9394633	0.580347	0.200847	0.379499	0.459139	0.58335	5.37274	1.82e-07
chrX	9399615	9399814	199	chrX:9399615-9399814	0.512273	1.84814	-1.33587	0.359495	0.369519	-10.3964	3.24e-09
chrX	9429800	9429999	199	chrX:9429800-9429999	0.987909	0.74197	0.245939	0.473465	0.31986	1.3459	0.195572
chrX	9442893	9443097	204	chrX:9442893-9443097	1.11091	0.902386	0.208522	0.483178	0.364404	0.753596	0.460357
chrX	9458878	9459088	210	chrX:9458878-9459088	0.188693	-0.155151	0.343844	0.287761	0.435336	2.55595	0.0191034
chrX	9470653	9471487	834	chrX:9470653-9471487	1.50503	1.60567	-0.100643	0.354161	0.0794171	-1.38217	0.170093
chrX	9506442	9506785	343	chrX:9506442-9506785	1.39532	1.11011	0.285205	0.307733	0.261045	2.57541	0.0139774
chrX	9539966	9540169	203	chrX:9539966-9540169	0.941454	0.785909	0.155546	0.366939	0.338269	0.976033	0.340958
chrX	9547641	9547868	227	chrX:9547641-9547868	2.02451	2.05455	-0.0300379	0.208212	0.665794	-0.167471	0.869074
chrX	9554004	9554219	215	chrX:9554004-9554219	1.43727	1.57114	-0.133864	0.355141	0.577747	-1.0113	0.32031
chrX	9557741	9557988	247	chrX:9557741-9557988	1.09291	0.604747	0.488161	0.458891	0.28568	3.78183	0.000719526
chrX	9581598	9582057	459	chrX:9581598-9582057	1.49673	0.863651	0.633076	0.387445	0.307223	4.70687	1.85e-05
chrX	9582604	9582805	201	chrX:9582604-9582805	1.48127	1.68723	-0.205962	0.337491	0.348964	-1.14133	0.267437
chrX	9604470	9604705	235	chrX:9604470-9604705	1.26577	0.882652	0.383121	0.273443	0.313622	3.22523	0.00459955
chrX	9610580	9610784	204	chrX:9610580-9610784	1.00191	0.672879	0.32903	0.381381	0.25887	2.31107	0.0318786
chrX	9612039	9612246	207	chrX:9612039-9612246	0.30596	1.23414	-0.928182	0.246612	0.267705	-6.0316	9.22e-07
chrX	9615942	9616257	315	chrX:9615942-9616257	1.64002	0.303826	1.3362	0.672393	0.379031	8.56881	9.83e-10
chrX	9616798	9617343	545	chrX:9616798-9617343	1.21618	1.07095	0.145227	0.474304	0.195939	1.10522	0.274205
chrX	9621059	9621337	278	chrX:9621059-9621337	0.845659	0.815019	0.0306401	0.430439	0.304544	0.234106	0.816277
chrX	9628516	9628827	311	chrX:9628516-9628827	1.39802	1.30754	0.0904848	0.416616	0.162831	0.815104	0.419975
chrX	9629831	9630060	229	chrX:9629831-9630060	1.22079	1.26932	-0.0485304	0.321142	0.266361	-0.362415	0.719567
chrX	9637165	9637382	217	chrX:9637165-9637382	0.313152	0.418283	-0.105131	0.397142	0.839849	-0.45212	0.655582
chrX	9639568	9640198	630	chrX:9639568-9640198	1.26784	0.703312	0.564533	0.318513	0.48771	4.76796	9.38e-06
chrX	9642795	9643167	372	chrX:9642795-9643167	1.32545	0.774678	0.550776	0.374746	0.270607	3.97129	0.000333824
chrX	9644930	9645870	940	chrX:9644930-9645870	1.29902	0.854327	0.444694	0.328808	0.228198	4.51571	1.86e-05
chrX	9646799	9646998	199	chrX:9646799-9646998	1.70245	1.97045	-0.268	0.30758	0.308516	-1.73218	0.0986489
chrX	9648737	9648952	215	chrX:9648737-9648952	0.467758	1.95189	-1.48414	0.314555	0.409829	-6.31561	1.36e-07
chrX	9663007	9663574	567	chrX:9663007-9663574	1.15702	1.15534	0.00167415	0.29015	0.498022	0.0142662	0.98867
chrX	9693054	9694008	954	chrX:9693054-9694008	0.952	0.127306	0.824694	0.563678	0.413128	7.5755	2.12e-11
chrX	9706934	9707151	217	chrX:9706934-9707151	0.946545	1.18247	-0.235929	0.345592	0.554432	-1.79411	0.0832593
chrX	9713448	9715354	1906	chrX:9713448-9715354	0.591373	0.0331894	0.558183	0.481426	0.442842	7.21085	1.03e-11
chrX	9761105	9761304	199	chrX:9761105-9761304	0.984091	0.934167	0.0499243	0.379775	0.0757569	0.392665	0.699938
chrX	9783655	9783989	334	chrX:9783655-9783989	1.20466	0.933182	0.271477	0.299762	0.234838	2.29102	0.0271404
chrX	9801587	9801889	302	chrX:9801587-9801889	1.46	1.67823	-0.218232	0.414119	0.222172	-1.82034	0.079653
chrX	9805070	9805269	199	chrX:9805070-9805269	1.35382	1.59174	-0.237924	0.316753	0.216159	-1.8382	0.081572
chrX	9816316	9816521	205	chrX:9816316-9816521	1.16282	0.753333	0.409485	0.317937	0.337732	2.93414	0.00830085
chrX	9818471	9819339	868	chrX:9818471-9819339	1.51549	0.45048	1.06502	0.601841	0.353949	10.8969	2.41e-17
chrX	9822387	9823147	760	chrX:9822387-9823147	1.45141	0.296591	1.15482	0.519984	0.557788	11.6795	6.04e-19
chrX	9823657	9824637	980	chrX:9823657-9824637	1.2546	0.15186	1.10274	0.583589	0.22589	12.329	6.68e-23
chrX	9826184	9826763	579	chrX:9826184-9826763	1.30573	0.602134	0.703593	0.375831	0.457378	6.92805	3.76e-09
chrX	9827732	9827940	208	chrX:9827732-9827940	1.28909	0.945884	0.343207	0.383231	0.157163	2.69632	0.0112871
chrX	9831938	9832159	221	chrX:9831938-9832159	0.943879	0.977374	-0.0334948	0.279469	0.218596	-0.165763	0.869709
chrX	9833417	9833789	372	chrX:9833417-9833789	1.47125	0.453163	1.01809	0.801513	0.533557	4.91399	1.78e-05
chrX	9840590	9841107	517	chrX:9840590-9841107	1.26424	0.745076	0.519167	0.318862	0.114269	4.90288	7.42e-06
chrX	9860452	9860946	494	chrX:9860452-9860946	1.663	0.366288	1.29671	0.60847	0.601772	10.2662	5.33e-15
chrX	9865170	9865428	258	chrX:9865170-9865428	1.6813	0.522614	1.15868	0.666413	0.43231	6.48149	8.74e-08
chrX	9867228	9867539	311	chrX:9867228-9867539	1.43689	1.21386	0.223023	0.25696	0.659309	2.04253	0.0487677
chrX	9868604	9868888	284	chrX:9868604-9868888	1.29358	0.354495	0.939081	0.287382	0.22025	7.27067	1.01e-07
chrX	9872512	9873136	624	chrX:9872512-9873136	1.62561	0.410581	1.21503	0.656985	0.275658	8.57184	6.61e-12
chrX	9874034	9875064	1030	chrX:9874034-9875064	1.3128	0.674669	0.638132	0.409633	0.451243	8.98454	5.07e-15
chrX	9889414	9889663	249	chrX:9889414-9889663	1.69827	1.62242	0.0758486	0.488311	0.461974	0.398686	0.694349
chrX	9895339	9895726	387	chrX:9895339-9895726	0.92053	2.01542	-1.09489	0.369297	0.444407	-7.03995	1.04e-06
chrX	9911523	9912179	656	chrX:9911523-9912179	1.37777	1.22315	0.154617	0.367021	0.447344	1.33087	0.187683
chrX	9913894	9914097	203	chrX:9913894-9914097	1.24173	0.738257	0.50347	0.247703	0.229557	4.11481	0.000631435
chrX	9920125	9920521	396	chrX:9920125-9920521	1.36284	0.115227	1.24761	0.553611	0.272965	8.88496	4.68e-12
chrX	9921026	9921389	363	chrX:9921026-9921389	1.42086	0.131515	1.28935	0.466842	0.206488	10.417	3.3e-12
chrX	9942393	9944584	2191	chrX:9942393-9944584	0.846467	0.116963	0.729504	0.523784	0.351482	11.5066	1.17e-24
chrX	9975021	9975228	207	chrX:9975021-9975228	1.34339	0.937374	0.40602	0.365189	0.602966	2.42486	0.0227891
chrX	9976193	9976436	243	chrX:9976193-9976436	1.21994	1.18583	0.0341062	0.294073	0.277233	0.173165	0.863902
chrX	10015507	10015740	233	chrX:10015507-10015740	0.272778	1.09525	-0.822475	0.348019	0.424688	-6.12521	6.99e-07
chrX	10018474	10018673	199	chrX:10018474-10018673	0.931	0.192803	0.738197	0.194675	0.282674	4.72494	0.000135236
chrX	10022165	10022373	208	chrX:10022165-10022373	1.03945	1.09364	-0.0541818	0.416579	0.497935	-0.306259	0.761463
chrX	10037680	10038185	505	chrX:10037680-10038185	1.02375	0.147182	0.876563	0.496649	0.113971	7.31883	1.99e-09
chrX	10045135	10045889	754	chrX:10045135-10045889	1.16072	0.124015	1.0367	0.525859	0.342342	10.0349	4.49e-16
chrX	10049620	10049819	199	chrX:10049620-10049819	0.0770455	1.21939	-1.14235	0.248715	0.245612	-9.03926	1.5e-10
chrX	10050524	10050865	341	chrX:10050524-10050865	1.34332	0.953106	0.390212	0.325612	0.122735	3.81989	0.000435637
chrX	10052154	10052395	241	chrX:10052154-10052395	1.30291	0.856439	0.44647	0.338068	0.359756	2.77496	0.0117153
chrX	10053947	10054480	533	chrX:10053947-10054480	1.15042	0.66173	0.488694	0.453118	0.243023	4.53255	2.82e-05
chrX	10056588	10056789	201	chrX:10056588-10056789	1.11741	0.236288	0.881121	0.547291	0.578078	3.86783	0.00100742
chrX	10057414	10057626	212	chrX:10057414-10057626	0.187973	1.83404	-1.64607	0.439396	0.629346	-13.0034	2.04e-13
chrX	10062426	10062717	291	chrX:10062426-10062717	1.28097	1.04187	0.239101	0.297269	0.192096	1.76587	0.0873653
chrX	10063660	10064113	453	chrX:10063660-10064113	1.45809	0.395316	1.06278	0.463196	0.21494	8.89122	1.07e-12
chrX	10066768	10067008	240	chrX:10066768-10067008	0.936273	0.126515	0.809758	0.555448	0.29557	4.59062	0.000302773
chrX	10070060	10070642	582	chrX:10070060-10070642	1.29877	1.02896	0.269808	0.364329	0.175397	2.32796	0.023093
chrX	10084664	10085178	514	chrX:10084664-10085178	0.278379	-0.0272475	0.305626	0.498397	0.449648	2.07535	0.0419793
chrX	10086227	10087011	784	chrX:10086227-10087011	0.656625	-0.133021	0.789646	0.404187	0.222622	7.20861	2.25e-10
chrX	10093802	10094029	227	chrX:10093802-10094029	1.42645	0.28053	1.14592	0.457277	0.658164	5.79522	1.3e-05
chrX	10112987	10113327	340	chrX:10112987-10113327	0.792848	0.678535	0.114313	0.26571	0.194812	0.73166	0.471365
chrX	10113870	10114390	520	chrX:10113870-10114390	0.215668	1.77002	-1.55435	0.375387	0.259955	-15.6814	1.76e-21
chrX	10115493	10115834	341	chrX:10115493-10115834	1.24864	0.967159	0.281477	0.375094	0.382401	2.05997	0.0457077
chrX	10122802	10123001	199	chrX:10122802-10123001	-0.173889	1.50689	-1.68078	0.296269	0.100015	-15.4699	1.4e-14
chrX	10136117	10136326	209	chrX:10136117-10136326	0.208493	1.6248	-1.41631	0.243011	0.146026	-8.65606	3.43e-09
chrX	10140413	10140673	260	chrX:10140413-10140673	1.39885	1.25149	0.147359	0.525661	0.381733	0.968145	0.341407
chrX	10141718	10142217	499	chrX:10141718-10142217	1.42358	0.803106	0.62047	0.328351	0.411378	7.58466	1.74e-10
chrX	10148731	10149008	277	chrX:10148731-10149008	1.30706	1.76356	-0.456496	0.275927	0.268428	-3.24669	0.00242169
chrX	10377386	10377711	325	chrX:10377386-10377711	1.44073	1.3922	0.0485304	0.274181	0.470278	0.36227	0.718968
chrX	10410422	10410625	203	chrX:10410422-10410625	0.144508	0.794343	-0.649836	0.238923	0.468957	-3.81888	0.000726228
chrX	10494887	10495563	676	chrX:10494887-10495563	1.57909	1.67978	-0.100693	0.419639	0.332687	-0.914317	0.363952
chrX	10504889	10505088	199	chrX:10504889-10505088	1.53691	1.62402	-0.0871062	0.298514	0.308606	-0.573348	0.572802
chrX	10548007	10548832	825	chrX:10548007-10548832	0.625364	-0.834646	1.46001	0.448077	0.311099	12.7135	2.37e-22
chrX	10562815	10563050	235	chrX:10562815-10563050	1.26694	1.69904	-0.432096	0.312073	0.247377	-3.5388	0.00121203
chrX	10604277	10604476	199	chrX:10604277-10604476	0.275455	1.02992	-0.75447	0.335587	0.627435	-5.89403	3.19e-06
chrX	11039080	11039835	755	chrX:11039080-11039835	1.11289	-0.126856	1.23974	0.399139	0.491206	11.2182	2.48e-18
chrX	11066838	11067581	743	chrX:11066838-11067581	1.03011	0.129034	0.901079	0.484762	0.217559	10.2527	1.62e-16
chrX	11140829	11141044	215	chrX:11140829-11141044	0.745864	0.190985	0.554879	0.419524	0.521555	2.63151	0.0179014
chrX	11143325	11143529	204	chrX:11143325-11143529	0.980757	0.168738	0.81202	0.580356	0.221633	5.34164	1.19e-05
chrX	11344728	11344992	264	chrX:11344728-11344992	1.15218	0.915051	0.237131	0.332462	0.152303	2.29422	0.0295477
chrX	11355006	11356214	1208	chrX:11355006-11356214	0.895265	0.036995	0.85827	0.455736	0.16066	9.98371	9.09e-18
chrX	11592158	11594656	2498	chrX:11592158-11594656	0.806698	-0.172764	0.979462	0.466865	0.144843	15.14	7.06e-38
chrX	11683375	11683582	207	chrX:11683375-11683582	1.33418	1.4297	-0.0955152	0.348567	0.312516	-0.745896	0.464765
chrX	11685585	11687114	1529	chrX:11685585-11687114	0.868818	0.00918186	0.859636	0.463615	0.374236	10.254	2.93e-19
chrX	11693522	11693745	223	chrX:11693522-11693745	1.33758	1.16684	0.170732	0.429556	0.21881	1.12255	0.273085
chrX	11698436	11698672	236	chrX:11698436-11698672	1.58076	0.258232	1.32253	0.354599	0.368764	7.06132	1.7e-07
chrX	11729698	11729913	215	chrX:11729698-11729913	1.03691	0.604646	0.432263	0.260556	0.238971	4.93856	2.61e-05
chrX	12065835	12067368	1533	chrX:12065835-12067368	0.878449	0.060393	0.818056	0.498507	0.621749	10.6515	1.04e-20
chrX	12305738	12306132	394	chrX:12305738-12306132	1.11595	0.615606	0.500339	0.312208	0.279792	4.78978	1.39e-05
chrX	12511338	12512264	926	chrX:12511338-12512264	1.42281	0.366621	1.05619	0.484195	0.322961	9.24651	2.69e-15
chrX	12629716	12630127	411	chrX:12629716-12630127	0.679491	0.782848	-0.103358	0.430318	0.345276	-0.715983	0.477281
chrX	12635487	12635726	239	chrX:12635487-12635726	0.320379	1.68293	-1.36255	0.282087	0.290392	-7.73196	1.48e-07
chrX	12637100	12637342	242	chrX:12637100-12637342	0.74197	1.32313	-0.581162	0.34276	0.191322	-3.10071	0.00565561
chrX	12644618	12645780	1162	chrX:12644618-12645780	1.37412	1.13712	0.236995	0.399271	0.233322	3.16801	0.00195107
chrX	12649677	12649890	213	chrX:12649677-12649890	1.72718	1.7972	-0.0700152	0.215428	0.331173	-0.73056	0.474465
chrX	12688333	12688536	203	chrX:12688333-12688536	0.186532	1.05965	-0.873114	0.303828	0.265792	-7.95666	5.01e-11
chrX	12719024	12720382	1358	chrX:12719024-12720382	0.833247	-0.0855952	0.918842	0.461011	0.489528	10.5786	6.17e-20
chrX	12727227	12727488	261	chrX:12727227-12727488	0.176371	1.66578	-1.48941	0.462734	0.655845	-10.0196	2.85e-11
chrX	12747513	12747846	333	chrX:12747513-12747846	1.27123	0.732121	0.539106	0.331567	0.303301	5.02348	1e-05
chrX	12753034	12753264	230	chrX:12753034-12753264	1.21961	1.43551	-0.215899	0.453708	0.504716	-1.51548	0.138138
chrX	12901487	12901737	250	chrX:12901487-12901737	0.55503	-0.742879	1.29791	0.276061	0.386579	9.14361	3.68e-10
chrX	12902527	12904642	2115	chrX:12902527-12904642	0.420541	-0.363575	0.784116	0.503529	0.522467	10.2902	1.21e-20
chrX	12971376	12972800	1424	chrX:12971376-12972800	1.45901	0.440406	1.01861	0.560156	0.32103	10.8195	1.55e-20
chrX	13219053	13219513	460	chrX:13219053-13219513	1.46141	0.337626	1.12378	0.66757	0.234612	8.59083	1.07e-11
chrX	13241165	13241381	216	chrX:13241165-13241381	0.195076	1.69015	-1.49508	0.415575	0.276598	-8.67601	1.61e-08
chrX	13257220	13257448	228	chrX:13257220-13257448	1.45836	1.28051	0.177858	0.507921	0.460229	1.05424	0.300246
chrX	13306758	13307507	749	chrX:13306758-13307507	1.21662	0.186532	1.03008	0.520328	0.229196	8.67293	1.02e-13
chrX	13347698	13347909	211	chrX:13347698-13347909	0.851818	1.3725	-0.520682	0.448315	0.49718	-3.18615	0.00678566
chrX	13445333	13445534	201	chrX:13445333-13445534	-0.497433	1.8596	-2.35703	0.420634	0.640339	-15.9187	6.63e-20
chrX	13497411	13498477	1066	chrX:13497411-13498477	0.692785	0.215393	0.477393	0.476426	0.293898	4.59763	1.08e-05
chrX	13580877	13581673	796	chrX:13580877-13581673	0.105284	-0.153097	0.258381	0.389576	0.438049	1.96937	0.0525975
chrX	13616885	13617883	998	chrX:13616885-13617883	-0.0012273	-0.321114	0.319886	0.614289	0.891622	1.66355	0.099333
chrX	13662287	13663340	1053	chrX:13662287-13663340	0.0120248	-0.0184986	0.0305234	0.473417	0.466529	0.255243	0.799062
chrX	13688628	13688840	212	chrX:13688628-13688840	1.19776	0.517323	0.680434	0.314155	0.42484	4.5716	7.74e-05
chrX	13707830	13708037	207	chrX:13707830-13708037	1.23812	1.09101	0.147111	0.296756	0.46731	1.12641	0.27005
chrX	13713609	13713823	214	chrX:13713609-13713823	1.49727	1.49944	-0.00217166	0.216823	0.0857385	-0.0254597	0.979869
chrX	13745023	13745222	199	chrX:13745023-13745222	1.32867	1.57086	-0.242184	0.35367	0.328665	-1.79752	0.0855207
chrX	13828378	13828650	272	chrX:13828378-13828650	1.2123	1.18917	0.0231363	0.278134	0.463691	0.195805	0.846306
chrX	13865479	13867107	1628	chrX:13865479-13867107	0.35183	0.105341	0.246489	0.361837	0.94069	2.26403	0.0250556
chrX	13936941	13937298	357	chrX:13936941-13937298	1.59055	0.946004	0.644542	0.414263	0.408034	5.65381	1.28e-06
chrX	13957593	13958311	718	chrX:13957593-13958311	0.175299	-0.179665	0.354963	0.473585	0.790607	2.19369	0.0319554
chrX	14023891	14024090	199	chrX:14023891-14024090	-0.0956565	0.357803	-0.45346	0.277505	0.293766	-3.96164	0.000425836
chrX	14171849	14172220	371	chrX:14171849-14172220	0.574318	-0.122008	0.696326	0.488543	0.441647	2.93408	0.00544789
chrX	14457172	14457690	518	chrX:14457172-14457690	0.422485	0.561907	-0.139422	0.277956	0.271457	-1.95687	0.0547479
chrX	14800841	14801843	1002	chrX:14800841-14801843	0.851521	-0.225806	1.07733	0.501336	0.648091	11.3716	1.14e-20
chrX	15211561	15211771	210	chrX:15211561-15211771	0.896121	0.984899	-0.0887777	0.781639	0.470994	-0.379414	0.707265
chrX	15262997	15263975	978	chrX:15262997-15263975	0.734162	-0.243039	0.9772	0.448748	0.197955	10.2084	4.92e-17
chrX	15421081	15421695	614	chrX:15421081-15421695	0.3665	-0.365379	0.731879	0.487388	0.0809616	6.26666	3.59e-08
chrX	15428763	15429066	303	chrX:15428763-15429066	0.357977	0.091913	0.266064	1.00459	0.459374	0.981206	0.332128
chrX	15574176	15575174	998	chrX:15574176-15575174	1.33175	0.19903	1.13272	0.627389	0.225853	11.0068	3.69e-19
chrX	15602602	15604131	1529	chrX:15602602-15604131	-0.0241364	0.215668	-0.239804	0.378993	0.74432	-2.45953	0.015168
chrX	15630640	15631368	728	chrX:15630640-15631368	1.5986	0.34947	1.24913	0.580983	0.407804	10.6758	1.97e-17
chrX	15665820	15666692	872	chrX:15665820-15666692	0.15098	-0.344209	0.495189	0.538309	0.734204	3.83362	0.000229268
chrX	15710511	15710710	199	chrX:15710511-15710710	0.503136	-0.0905303	0.593667	0.17737	1.17886	1.9641	0.0790159
chrX	15717975	15719124	1149	chrX:15717975-15719124	-0.334485	-0.13524	-0.199245	0.398171	0.514679	-1.87394	0.0636343
chrX	15743767	15743967	200	chrX:15743767-15743967	0.458257	1.68947	-1.23121	0.220342	0.267817	-7.35334	1.28e-06
chrX	15750887	15751302	415	chrX:15750887-15751302	1.31564	0.45642	0.859216	0.657031	0.347488	5.38385	4.96e-06
chrX	15782100	15783827	1727	chrX:15782100-15783827	-0.046702	-0.160867	0.114165	0.550676	0.358338	0.817766	0.414666
chrX	16583130	16583391	261	chrX:16583130-16583391	0.337849	1.88505	-1.5472	0.307124	0.294235	-11.0634	1.54e-14
chrX	16639789	16640942	1153	chrX:16639789-16640942	0.634508	0.0602399	0.574268	0.477286	0.376834	6.40727	2.74e-09
chrX	16647408	16647963	555	chrX:16647408-16647963	-0.0873788	-0.193914	0.106535	0.457792	0.554107	0.753645	0.454507
chrX	16713726	16715466	1740	chrX:16713726-16715466	-0.380193	-0.3575	-0.0226925	0.473787	0.442593	-0.146689	0.883613
chrX	16767900	16768114	214	chrX:16767900-16768114	1.28006	0.765354	0.514707	0.4815	0.35321	2.83197	0.0080579
chrX	16780770	16780991	221	chrX:16780770-16780991	1.55782	1.66682	-0.109	0.344119	0.317733	-0.612738	0.547018
chrX	16797431	16799674	2243	chrX:16797431-16799674	0.464664	-0.0750395	0.539704	0.445353	0.363353	7.12157	1.19e-11
chrX	16810712	16810943	231	chrX:16810712-16810943	0.519576	-0.0788889	0.598465	0.360264	0.444268	4.15434	0.000240742
chrX	16874386	16875367	981	chrX:16874386-16875367	0.881596	0.28729	0.594306	0.530244	0.315541	5.78808	8.76e-08
chrX	16961887	16962091	204	chrX:16961887-16962091	0.9955	0.9675	0.0279997	0.345827	0.308488	0.199479	0.843968
chrX	17028253	17028452	199	chrX:17028253-17028452	1.289	1.08947	0.19953	0.266649	0.310844	1.57092	0.134258
chrX	17302605	17305866	3261	chrX:17302605-17305866	0.980631	-0.103518	1.08415	0.453435	0.196191	20.9583	1.39e-63
chrX	17416019	17416218	199	chrX:17416019-17416218	2.12162	1.34311	0.77851	0.640978	0.733257	3.78494	0.00127338
chrX	17582997	17584786	1789	chrX:17582997-17584786	1.00519	-0.0544192	1.05961	0.453149	0.387345	14.8824	5.72e-34
chrX	17615736	17616049	313	chrX:17615736-17616049	1.35582	0.447064	0.908754	0.624317	0.275073	6.13937	6.43e-07
chrX	17620320	17620525	205	chrX:17620320-17620525	0.372818	0.204659	0.168159	0.357108	0.220664	0.895021	0.38353
chrX	17660285	17660539	254	chrX:17660285-17660539	0.804939	0.208788	0.596152	0.298974	0.375233	5.42192	6.41e-06
chrX	17664835	17666700	1865	chrX:17664835-17666700	1.02785	-0.214159	1.24201	0.386966	0.30517	18.8085	1.81e-46
chrX	17678052	17678257	205	chrX:17678052-17678257	1.30073	0.922651	0.378076	0.361035	0.235766	2.31648	0.0322208
chrX	17703059	17704624	1565	chrX:17703059-17704624	1.38963	0.896823	0.492803	0.667063	0.167847	5.37053	2.46e-07
chrX	17787555	17789718	2163	chrX:17787555-17789718	0.854372	-0.0986436	0.953016	0.520178	0.186115	12.954	6.82e-29
chrX	18146962	18149595	2633	chrX:18146962-18149595	1.33389	0.352599	0.98129	0.52803	0.246114	14.9225	7.24e-36
chrX	18156232	18156434	202	chrX:18156232-18156434	1.47682	0.832929	0.643889	0.352081	0.274623	5.77882	2.91e-06
chrX	18157635	18158031	396	chrX:18157635-18158031	1.63958	0.744757	0.894824	0.698229	0.53551	5.61753	7.44e-07
chrX	18281706	18283594	1888	chrX:18281706-18283594	0.863268	-0.260265	1.12353	0.44892	0.356017	13.0663	1.8e-28
chrX	18352680	18354503	1823	chrX:18352680-18354503	0.561048	-0.0658512	0.626899	0.483348	0.353183	7.41729	4.22e-12
chrX	18532557	18532766	209	chrX:18532557-18532766	1.14169	1.23205	-0.0903535	1.43302	1.16465	-0.211403	0.835475
chrX	18556396	18556623	227	chrX:18556396-18556623	1.0363	1.08899	-0.0526868	0.460274	0.194121	-0.287827	0.775962
chrX	18569934	18570272	338	chrX:18569934-18570272	1.16973	0.257727	0.912	0.638634	0.0968029	5.96241	1.04e-06
chrX	18578472	18578687	215	chrX:18578472-18578687	1.75436	0.963182	0.791182	0.588865	0.295281	3.21976	0.00445998
chrX	18602440	18603756	1316	chrX:18602440-18603756	0.579951	-0.195501	0.775452	0.497373	0.319615	8.13281	1.96e-13
chrX	18604440	18604734	294	chrX:18604440-18604734	1.26664	1.45705	-0.190409	0.397855	0.398584	-1.52355	0.13535
chrX	18801270	18801986	716	chrX:18801270-18801986	1.41914	1.07117	0.347974	0.409479	0.573203	2.40764	0.0187578
chrX	18822238	18822552	314	chrX:18822238-18822552	1.5625	0.966212	0.596288	0.328214	0.21173	4.09299	0.000194145
chrX	18823097	18823323	226	chrX:18823097-18823323	1.46141	1.34511	0.116295	0.48118	0.19925	0.583364	0.5667
chrX	18827087	18827333	246	chrX:18827087-18827333	0.498838	1.65354	-1.1547	0.403179	0.455564	-6.40871	2.55e-07
chrX	18827872	18828071	199	chrX:18827872-18828071	1.15018	1.35682	-0.206637	0.276421	0.23936	-1.3362	0.19714
chrX	18834989	18835216	227	chrX:18834989-18835216	1.28591	0.656061	0.629849	0.336025	0.221204	3.38145	0.00310151
chrX	18854249	18854542	293	chrX:18854249-18854542	1.0535	0.906667	0.146833	0.377726	0.277733	1.24703	0.219971
chrX	18893508	18893715	207	chrX:18893508-18893715	1.21418	1.38039	-0.16621	0.415067	0.300202	-1.04664	0.303437
chrX	18911774	18913313	1539	chrX:18911774-18913313	0.785511	-0.249105	1.03462	0.49033	0.184461	12.5621	7.35e-26
chrX	18976756	18976967	211	chrX:18976756-18976967	1.16061	1.06677	0.0938383	0.571072	0.329313	0.447616	0.657573
chrX	19049740	19051246	1506	chrX:19049740-19051246	0.692966	0.0262027	0.666763	0.420311	0.417208	9.34633	5.02e-17
chrX	19090813	19091012	199	chrX:19090813-19091012	0.913091	0.40856	0.50453	0.345606	0.235543	4.0518	0.000659453
chrX	19123288	19123533	245	chrX:19123288-19123533	1.09212	0.933889	0.158232	0.243491	0.195635	1.72367	0.0951566
chrX	19260865	19261064	199	chrX:19260865-19261064	1.44161	0.918611	0.522995	0.310296	0.312839	4.46004	0.000116276
chrX	19271500	19272548	1048	chrX:19271500-19272548	0.74881	-0.209559	0.958369	0.456694	0.108008	11.557	8.83e-21
chrX	19279247	19279462	215	chrX:19279247-19279462	0.207697	-0.269722	0.477419	0.342929	0.206974	3.8253	0.000592588
chrX	19281034	19281233	199	chrX:19281034-19281233	0.300833	1.52098	-1.22015	0.38438	0.425862	-7.92705	2.4e-08
chrX	19285555	19285798	243	chrX:19285555-19285798	1.09921	0.818232	0.28098	0.267946	0.357704	2.65114	0.0125497
chrX	19298895	19299094	199	chrX:19298895-19299094	1.24482	1.08242	0.162394	0.266304	0.294315	1.36855	0.187
chrX	19300476	19300944	468	chrX:19300476-19300944	0.7948	0.0683334	0.726467	0.376635	0.283033	7.6393	4.24e-10
chrX	19301536	19301745	209	chrX:19301536-19301745	1.39527	0.345505	1.04977	0.563699	0.345172	6.51577	3.38e-07
chrX	19319934	19320169	235	chrX:19319934-19320169	1.15291	1.01899	0.133919	0.381023	0.248291	1.2519	0.220835
chrX	19326189	19326391	202	chrX:19326189-19326391	1.33473	1.55379	-0.219061	0.296198	0.541488	-1.41071	0.176324
chrX	19392250	19392452	202	chrX:19392250-19392452	0.216648	1.8151	-1.59845	0.294718	0.272632	-15.3331	1.52e-18
chrX	19442841	19444152	1311	chrX:19442841-19444152	0.862419	0.133112	0.729308	0.475089	0.435754	9.07549	1.02e-15
chrX	19460887	19461093	206	chrX:19460887-19461093	1.74618	1.13625	0.609932	0.36323	0.330392	3.58396	0.00185803
chrX	19516654	19516902	248	chrX:19516654-19516902	1.40673	0.906717	0.50001	0.399283	0.319853	3.43456	0.00170703
chrX	19535927	19536142	215	chrX:19535927-19536142	1.30727	1.00005	0.307222	0.313725	0.284227	2.12576	0.0416121
chrX	19634841	19635099	258	chrX:19634841-19635099	1.12206	0.829798	0.292263	0.28292	0.179944	2.9401	0.00680953
chrX	19814592	19816657	2065	chrX:19814592-19816657	1.01324	0.130527	0.88271	0.520038	0.615297	11.881	2.15e-25
chrX	19918284	19919477	1193	chrX:19918284-19919477	0.7595	0.0623611	0.697139	0.502621	0.50885	8.21836	2.17e-13
chrX	20044035	20045879	1844	chrX:20044035-20045879	1.07116	0.0405981	1.03056	0.469441	0.130821	12.4117	1.55e-26
chrX	20069202	20070250	1048	chrX:20069202-20070250	0.123909	-0.188939	0.312848	0.455935	0.842098	2.19103	0.0313453
chrX	20193255	20196842	3587	chrX:20193255-20196842	0.997005	-0.0978493	1.09485	0.470256	0.391822	20.7244	1.01e-64
chrX	20341013	20341217	204	chrX:20341013-20341217	0.897727	-0.132273	1.03	0.163672	0.372855	7.18953	1.43e-06
chrX	21301669	21303373	1704	chrX:21301669-21303373	0.883615	0.0224287	0.861186	0.538662	0.334686	10.8887	1.29e-21
chrX	21537106	21537305	199	chrX:21537106-21537305	1.07703	1.0647	0.0123332	0.236325	0.318528	0.101711	0.919662
chrX	21583687	21587170	3483	chrX:21583687-21587170	1.08066	-0.0201916	1.10085	0.551737	0.151797	19.7216	1.44e-59
chrX	21685913	21686339	426	chrX:21685913-21686339	1.18618	0.613606	0.572576	0.384445	0.28207	4.99115	7.26e-06
chrX	21767348	21768286	938	chrX:21767348-21768286	0.803636	-0.0855	0.889136	0.531453	0.0978049	7.4496	2.91e-11
chrX	21784067	21785677	1610	chrX:21784067-21785677	1.4419	1.12351	0.318384	0.363679	0.350953	3.13982	0.00206864
chrX	21868359	21869675	1316	chrX:21868359-21869675	0.927156	0.0861202	0.841036	0.635375	0.375163	9.18728	2.87e-16
chrX	21904970	21905169	199	chrX:21904970-21905169	0.45048	1.39227	-0.941793	0.275225	0.258949	-8.09386	3.91e-10
chrX	21960877	21961221	344	chrX:21960877-21961221	0.81103	0.60351	0.20752	0.21377	0.526952	1.43371	0.16259
chrX	22120833	22121040	207	chrX:22120833-22121040	0.148818	-0.235934	0.384752	0.318753	0.400652	2.00574	0.0549968
chrX	22200688	22200987	299	chrX:22200688-22200987	1.36388	1.2847	0.079182	0.381885	0.212857	0.696315	0.491799
chrX	22927865	22928161	296	chrX:22927865-22928161	1.70897	1.35384	0.355131	0.362242	0.279565	2.6893	0.0114638
chrX	23003541	23003880	339	chrX:23003541-23003880	0.711091	-0.211894	0.922985	0.649129	0.180954	4.14847	0.000159684
chrX	23259922	23263690	3768	chrX:23259922-23263690	0.890033	-0.110614	1.00065	0.494855	0.490072	18.9098	4.01e-57
chrX	23594023	23594695	672	chrX:23594023-23594695	1.23013	0.267392	0.962738	0.813831	0.249918	6.94285	5.65e-09
chrX	23595202	23596012	810	chrX:23595202-23596012	0.616727	-0.232254	0.848981	0.418978	0.523558	8.34392	1.21e-12
chrX	23670802	23671626	824	chrX:23670802-23671626	1.04323	-0.090867	1.1341	0.439723	0.474523	10.9874	1.01e-18
chrX	23710836	23711828	992	chrX:23710836-23711828	0.818372	-0.395351	1.21372	0.373363	0.246876	13.1065	1.02e-24
chrX	23835125	23836373	1248	chrX:23835125-23836373	0.769273	-0.342651	1.11192	0.4775	0.108358	12.8702	1.51e-25
chrX	23952667	23954680	2013	chrX:23952667-23954680	0.627918	-0.272784	0.900702	0.459484	0.349996	11.7403	5.63e-25
chrX	23982334	23983411	1077	chrX:23982334-23983411	0.0100579	-0.0233127	0.0333706	0.544872	0.437906	0.249997	0.803065
chrX	24077035	24078865	1830	chrX:24077035-24078865	0.501202	0.0619444	0.439258	0.53131	0.542112	4.5672	9.31e-06
chrX	24136253	24136454	201	chrX:24136253-24136454	0.554303	-0.179899	0.734202	0.242565	0.0902645	9.4697	1.23e-10
chrX	24239592	24239836	244	chrX:24239592-24239836	1.02559	0.0631817	0.962409	0.447725	0.168667	5.83625	1.06e-05
chrX	24241261	24242370	1109	chrX:24241261-24242370	1.82388	0.417383	1.40649	0.68634	0.446999	11.3039	1.43e-20
chrX	24283056	24283289	233	chrX:24283056-24283289	0.907864	1.03303	-0.125167	0.347254	0.672402	-0.550526	0.588433
chrX	24290142	24290861	719	chrX:24290142-24290861	1.76717	0.595076	1.17209	0.721995	0.175009	8.53028	3.82e-12
chrX	24299219	24299420	201	chrX:24299219-24299420	-0.0708378	-0.294444	0.223607	0.369959	0.571346	2.06414	0.0490649
chrX	24392805	24393968	1163	chrX:24392805-24393968	0.935149	0.0112259	0.923923	0.526762	0.580261	9.7411	7.9e-17
chrX	24472401	24472627	226	chrX:24472401-24472627	1.28691	1.21573	0.0711769	0.373936	0.28036	0.490337	0.62743
chrX	24486116	24486319	203	chrX:24486116-24486319	0.859722	1.72141	-0.861692	0.333351	0.175392	-4.72712	6.98e-05
chrX	24574144	24575699	1555	chrX:24574144-24575699	0.1002	-0.372258	0.472458	0.396948	0.336288	6.47059	1.1e-09
chrX	24621459	24622406	947	chrX:24621459-24622406	0.752955	-0.29828	1.05123	0.411284	0.227777	10.9608	3.25e-19
chrX	24716892	24717159	267	chrX:24716892-24717159	0.820242	0.786263	0.0339798	0.292702	0.748437	0.208633	0.836227
chrX	24918735	24918934	199	chrX:24918735-24918934	0.670909	0.378535	0.292374	0.417733	0.145963	1.87179	0.0708825
chrX	24922341	24922559	218	chrX:24922341-24922559	0.189015	1.32318	-1.13417	0.479123	0.450098	-5.40822	9.76e-06
chrX	24930104	24931744	1640	chrX:24930104-24931744	0.866921	0.0344192	0.832502	0.500243	0.40545	9.69311	8.26e-18
chrX	24932370	24934171	1801	chrX:24932370-24934171	0.974359	0.00566987	0.968689	0.544703	0.319179	14.1075	4.59e-32
chrX	24935008	24935790	782	chrX:24935008-24935790	0.725159	-0.182292	0.907451	0.396433	0.299344	7.9684	7.62e-12
chrX	24939046	24942559	3513	chrX:24939046-24942559	0.774126	-0.0201091	0.794235	0.493412	0.35534	16.017	3.47e-44
chrX	24943187	24944797	1610	chrX:24943187-24944797	0.926591	-0.283452	1.21004	0.437377	0.421676	16.5574	1.4e-37
chrX	24945554	24946182	628	chrX:24945554-24946182	0.360758	-0.40322	0.763977	0.431426	0.273056	6.27591	3.57e-08
chrX	24948129	24949522	1393	chrX:24948129-24949522	0.618748	-0.286655	0.905403	0.505269	0.638483	7.75172	1.74e-12
chrX	24950689	24951443	754	chrX:24950689-24951443	0.68925	-0.0725284	0.761778	0.564604	0.43717	6.11131	2.82e-08
chrX	24957434	24958192	758	chrX:24957434-24958192	1.32276	1.23391	0.0888504	0.297878	0.398861	1.18547	0.239122
chrX	24967035	24967278	243	chrX:24967035-24967278	1.41606	1.15535	0.260707	0.210657	0.622128	1.84591	0.0784538
chrX	25123031	25123230	199	chrX:25123031-25123230	0.177854	0.823283	-0.645429	0.458435	0.171167	-3.42529	0.00185757
chrX	25573817	25574491	674	chrX:25573817-25574491	1.71419	0.861699	0.852496	0.425247	0.293649	7.12354	1.26e-09
chrX	26066333	26066540	207	chrX:26066333-26066540	0.954121	0.960202	-0.0060808	0.268009	0.317567	-0.0558765	0.95587
chrX	26088627	26089594	967	chrX:26088627-26089594	1.58103	1.55061	0.0304211	0.324357	0.18902	0.431784	0.66679
chrX	26120332	26120531	199	chrX:26120332-26120531	1.34461	0.731212	0.613394	0.377252	0.327846	3.74928	0.000729945
chrX	26122303	26122913	610	chrX:26122303-26122913	0.453163	1.88648	-1.43332	0.335504	0.252095	-7.59164	1.72e-08
chrX	26485546	26487426	1880	chrX:26485546-26487426	1.22409	0.287773	0.936314	0.598612	0.354321	12.8497	7.45e-28
chrX	27391103	27391492	389	chrX:27391103-27391492	1.54923	1.38527	0.163962	0.320548	0.246521	1.07375	0.28957
chrX	27675011	27675744	733	chrX:27675011-27675744	1.57413	1.21074	0.363394	0.520503	0.230217	3.61221	0.000623197
chrX	27735801	27736566	765	chrX:27735801-27736566	1.7075	1.67277	0.0347255	0.293694	0.457749	0.449369	0.654297
chrX	27757965	27758711	746	chrX:27757965-27758711	1.83143	1.61182	0.21961	0.473673	0.219606	1.81581	0.0734347
chrX	27760077	27760279	202	chrX:27760077-27760279	1.27573	1.05129	0.224439	0.325368	0.511359	1.37663	0.187151
chrX	27791777	27792397	620	chrX:27791777-27792397	1.03942	0.258498	0.780927	0.430027	0.238736	4.30634	5.83e-05
chrX	27907560	27907759	199	chrX:27907560-27907759	1.1423	1.22268	-0.0803735	0.321374	0.174834	-0.459793	0.649033
chrX	27908626	27909640	1014	chrX:27908626-27909640	1.5318	1.26574	0.266065	0.39505	0.30471	3.29943	0.00131831
chrX	27970312	27971096	784	chrX:27970312-27971096	1.79044	2.07793	-0.287488	0.420207	0.559721	-2.60958	0.0107152
chrX	28587239	28587755	516	chrX:28587239-28587755	0.833121	0.133775	0.699346	0.475965	0.209609	4.40936	4.11e-05
chrX	29883487	29883808	321	chrX:29883487-29883808	1.30036	1.89841	-0.598045	0.450635	0.57662	-4.69825	4.41e-05
chrX	30143320	30143808	488	chrX:30143320-30143808	1.66788	0.927828	0.740051	0.55049	0.510536	5.62267	4.47e-07
chrX	30160006	30160260	254	chrX:30160006-30160260	1.57121	0.713535	0.857677	0.304394	0.246305	8.34989	2.3e-09
chrX	30174962	30175548	586	chrX:30174962-30175548	1.4217	0.489596	0.932101	0.432858	0.162856	9.22491	6.09e-13
chrX	30179333	30179556	223	chrX:30179333-30179556	1.59174	1.93086	-0.339116	0.448778	0.498525	-2.28664	0.0303523
chrX	30236059	30237764	1705	chrX:30236059-30237764	0.835187	-0.153164	0.988351	0.443022	0.189555	14.7824	3.82e-33
chrX	30545516	30545731	215	chrX:30545516-30545731	1.12	1.39742	-0.277425	0.427133	0.129085	-1.51034	0.18118
chrX	30558137	30558690	553	chrX:30558137-30558690	1.48038	1.63234	-0.151957	0.388393	0.315797	-1.69325	0.0952749
chrX	30580559	30582208	1649	chrX:30580559-30582208	1.01069	-0.0978409	1.10853	0.513869	0.25509	13.7174	1.95e-29
chrX	30648839	30649076	237	chrX:30648839-30649076	1.2297	1.19424	0.0354546	0.298315	0.321125	0.341272	0.735252
chrX	30759298	30759652	354	chrX:30759298-30759652	1.15425	1.03477	0.119479	0.536802	0.375524	0.739858	0.463503
chrX	30816758	30817827	1069	chrX:30816758-30817827	0.705653	-0.132824	0.838477	0.393893	0.435542	10.1892	7.81e-18
chrX	30999380	31000328	948	chrX:30999380-31000328	1.63054	0.308266	1.32227	0.70817	0.448272	10.4443	2.87e-17
chrX	31194267	31195027	760	chrX:31194267-31195027	0.862273	0.011534	0.850739	0.48165	0.607149	7.28395	1.73e-10
chrX	32969234	32969559	325	chrX:32969234-32969559	0.395409	-0.129943	0.525352	0.470188	0.51263	2.8387	0.00705968
chrX	33653932	33654982	1050	chrX:33653932-33654982	0.552818	-0.0843788	0.637197	0.386292	0.243461	6.05593	3.34e-08
chrX	34058491	34060518	2027	chrX:34058491-34060518	1.42098	0.679354	0.741624	0.425628	0.312361	11.5373	1.56e-24
chrX	34074934	34075400	466	chrX:34074934-34075400	1.33905	0.156591	1.18246	0.682151	0.142978	6.82652	9.06e-09
chrX	34315643	34316252	609	chrX:34315643-34316252	1.43813	0.943268	0.494862	0.333735	0.199822	3.56093	0.000648418
chrX	34584314	34586064	1750	chrX:34584314-34586064	0.90451	-0.0611111	0.965621	0.675039	0.304564	9.79107	1.11e-18
chrX	34870681	34872609	1928	chrX:34870681-34872609	1.55966	1.14693	0.412736	0.335258	0.165088	6.14712	4.05e-09
chrX	35553729	35554890	1161	chrX:35553729-35554890	1.67452	0.898058	0.776463	0.773124	0.333251	6.19427	1.29e-08
chrX	35726157	35726521	364	chrX:35726157-35726521	0.997254	0.244295	0.752959	0.404621	0.0962252	5.21664	4.18e-06
chrX	35847517	35848196	679	chrX:35847517-35848196	0.804753	-0.0610822	0.865835	0.282831	0.309104	10.7064	1.51e-16
chrX	36885321	36886647	1326	chrX:36885321-36886647	0.87739	0.0897456	0.787644	0.562799	0.49179	8.44242	2.31e-14
chrX	36890119	36892081	1962	chrX:36890119-36892081	1.37568	1.0103	0.365384	0.395927	0.571955	3.61975	0.000378014
chrX	36913279	36914638	1359	chrX:36913279-36914638	1.01232	-0.0874026	1.09972	0.491791	0.316827	13.8595	9.39e-29
chrX	36936214	36936811	597	chrX:36936214-36936811	1.39273	0.83601	0.556717	0.395438	0.415482	4.7188	1.49e-05
chrX	36937422	36938989	1567	chrX:36937422-36938989	1.6485	1.00411	0.64439	0.452166	0.167049	8.56157	5.96e-15
chrX	36971254	36971994	740	chrX:36971254-36971994	1.5632	0.238475	1.32473	0.676271	0.299334	10.7069	5.39e-17
chrX	37005666	37006689	1023	chrX:37005666-37006689	1.56641	0.465289	1.10112	0.684674	0.244066	9.74201	1.78e-16
chrX	37092976	37094398	1422	chrX:37092976-37094398	1.08067	0.0311418	1.04953	0.428043	0.461366	13.3937	2.09e-27
chrX	37185710	37185925	215	chrX:37185710-37185925	1.42	1.22126	0.198737	0.351888	0.353002	1.10447	0.279261
chrX	37235768	37236493	725	chrX:37235768-37236493	1.61917	0.403615	1.21555	0.736129	0.218377	8.96657	2.88e-13
chrX	37249055	37250189	1134	chrX:37249055-37250189	1.56463	0.508567	1.05606	0.549309	0.280296	9.71612	1.06e-16
chrX	37287233	37287873	640	chrX:37287233-37287873	1.57048	0.654946	0.915535	0.423108	0.447477	8.37457	3.65e-12
chrX	37289208	37289646	438	chrX:37289208-37289646	1.26686	0.00166662	1.2652	0.463619	0.185689	9.9728	1.42e-12
chrX	37315506	37316885	1379	chrX:37315506-37316885	0.896448	-0.0953788	0.991827	0.5124	0.326211	12.5405	3.74e-25
chrX	37429533	37430515	982	chrX:37429533-37430515	0.899645	0.0890909	0.810554	0.454314	0.130476	8.79666	2.83e-14
chrX	37591166	37592070	904	chrX:37591166-37592070	0.840424	0.118653	0.721771	0.525414	0.305011	6.67092	1.6e-09
chrX	37649857	37650298	441	chrX:37649857-37650298	0.816091	-0.0598295	0.87592	0.518184	0.109223	6.4255	1.23e-07
chrX	37659196	37659399	203	chrX:37659196-37659399	0.998818	0.968636	0.030182	0.437885	0.290361	0.162207	0.872918
chrX	37735058	37735340	282	chrX:37735058-37735340	1.22518	1.34535	-0.120172	0.307728	0.254047	-1.18935	0.243493
chrX	37963915	37965465	1550	chrX:37963915-37965465	0.783441	0.0563799	0.727062	0.433315	1.16532	8.07658	2.49e-13
chrX	38000219	38000687	468	chrX:38000219-38000687	1.63524	0.270152	1.36508	0.706231	0.318793	8.91173	9.73e-12
chrX	38071248	38072106	858	chrX:38071248-38072106	0.891374	-0.121869	1.01324	0.468643	0.346979	10.1405	1.03e-16
chrX	38229232	38229554	322	chrX:38229232-38229554	1.05873	0.427311	0.631417	0.617139	0.500607	3.45427	0.00132659
chrX	38305357	38306894	1537	chrX:38305357-38306894	1.04553	-0.183732	1.22926	0.397283	0.235759	15.5111	5.39e-33
chrX	38545365	38545687	322	chrX:38545365-38545687	0.736606	-0.174798	0.911404	0.350974	0.429541	6.68664	3.05e-07
chrX	38547761	38550323	2562	chrX:38547761-38550323	0.936385	-0.309797	1.24618	0.43972	0.264303	18.0716	1.5e-48
chrX	38647327	38647528	201	chrX:38647327-38647528	1.17782	1.07732	0.100495	0.258219	0.417552	0.82959	0.414749
chrX	38906490	38907220	730	chrX:38906490-38907220	1.04413	0.150216	0.893913	0.387108	0.217838	10.1159	1.17e-15
chrX	39160795	39160994	199	chrX:39160795-39160994	1.57509	1.35227	0.222816	0.215566	0.325458	3.07121	0.00682632
chrX	39162798	39163493	695	chrX:39162798-39163493	0.978	0.82921	0.14879	0.3289	0.110364	1.2139	0.228601
chrX	39190124	39190637	513	chrX:39190124-39190637	1.52633	1.75919	-0.232866	0.285264	0.638741	-1.51568	0.149312
chrX	39209865	39210097	232	chrX:39209865-39210097	1.33045	0.983599	0.346856	0.547055	0.299138	1.94511	0.0708848
chrX	39221183	39221388	205	chrX:39221183-39221388	1.733	1.56076	0.172242	0.232144	0.16801	1.97107	0.0627124
chrX	39250527	39250733	206	chrX:39250527-39250733	0.879818	0.845606	0.0342121	0.381885	0.140451	0.245274	0.808303
chrX	39260648	39261040	392	chrX:39260648-39261040	1.48365	1.70227	-0.218618	0.328303	0.575162	-1.62385	0.11045
chrX	39262910	39263549	639	chrX:39262910-39263549	1.47823	0.902449	0.575778	0.455499	0.286999	5.22747	2.13e-06
chrX	39280457	39280682	225	chrX:39280457-39280682	1.55539	1.35419	0.201202	0.385741	0.259628	1.33506	0.193717
chrX	39320646	39320845	199	chrX:39320646-39320845	1.47724	0.778485	0.698758	0.450777	0.326055	4.03993	0.000352161
chrX	39353158	39353450	292	chrX:39353158-39353450	0.827576	1.41096	-0.583384	0.320721	0.206629	-4.95145	3.24e-05
chrX	39357632	39358633	1001	chrX:39357632-39358633	0.501909	0.109629	0.39228	0.415587	0.316262	4.46659	1.96e-05
chrX	39389546	39389868	322	chrX:39389546-39389868	0.960818	0.653655	0.307163	0.425263	0.247572	2.3891	0.0216108
chrX	39397901	39398116	215	chrX:39397901-39398116	0.496454	0.395341	0.101113	0.388259	0.189881	0.619351	0.543048
chrX	39426089	39426324	235	chrX:39426089-39426324	1.04455	0.644192	0.400353	0.393421	0.204424	2.50746	0.0178506
chrX	39432627	39434269	1642	chrX:39432627-39434269	0.58508	-0.0708378	0.655918	0.431352	0.499923	9.22768	7.65e-17
chrX	39474503	39475320	817	chrX:39474503-39475320	0.557932	0.17286	0.385072	0.482567	0.484767	3.64231	0.000464814
chrX	39523152	39523549	397	chrX:39523152-39523549	1.33991	1.31348	0.0264243	0.358603	0.441078	0.211823	0.833289
chrX	39558231	39558430	199	chrX:39558231-39558430	1.30255	0.687727	0.614818	0.326991	0.200251	4.20579	0.000206779
chrX	39564160	39566522	2362	chrX:39564160-39566522	1.29726	0.258597	1.03866	0.520764	0.391463	14.0198	3.56e-33
chrX	39568890	39569110	220	chrX:39568890-39569110	0.527394	1.37598	-0.848591	0.494227	0.31315	-5.01185	5.28e-05
chrX	39572150	39572349	199	chrX:39572150-39572349	1.08739	0.892525	0.194869	0.333805	0.544326	1.22278	0.233933
chrX	39576563	39576809	246	chrX:39576563-39576809	1.306	1.46114	-0.155136	0.357222	0.327258	-1.00498	0.328941
chrX	39584868	39585130	262	chrX:39584868-39585130	1.22861	0.564192	0.664414	0.585514	0.249216	4.05513	0.000536212
chrX	39586197	39586410	213	chrX:39586197-39586410	0.618455	0.262752	0.355702	0.458026	0.168863	2.10228	0.0437512
chrX	39589549	39589750	201	chrX:39589549-39589750	0.783454	0.440758	0.342697	0.272614	0.190706	3.18304	0.00331818
chrX	39600216	39600488	272	chrX:39600216-39600488	1.46697	1.25429	0.212677	0.258404	0.304254	1.9136	0.0650742
chrX	39605998	39606197	199	chrX:39605998-39606197	1.02027	0.902349	0.117924	0.340529	0.373469	0.802112	0.431919
chrX	39622085	39622554	469	chrX:39622085-39622554	1.27976	1.34455	-0.0647819	0.410833	0.643273	-0.524572	0.602183
chrX	39644435	39644714	279	chrX:39644435-39644714	1.34491	1.24384	0.101071	0.298956	0.3223	0.850323	0.402639
chrX	39649163	39649367	204	chrX:39649163-39649367	1.59845	1.32288	0.275576	0.413632	0.283203	1.8437	0.0808001
chrX	39649875	39650180	305	chrX:39649875-39650180	1.24012	0.974596	0.265525	0.370565	0.366074	2.13208	0.0410809
chrX	39652558	39652758	200	chrX:39652558-39652758	1.09482	0.887273	0.207545	0.442978	0.278487	1.27809	0.216095
chrX	39654929	39655136	207	chrX:39654929-39655136	1.1317	0.214949	0.916748	0.579381	0.306566	5.4361	8.03e-06
chrX	39674967	39675175	208	chrX:39674967-39675175	1.64382	1.29379	0.35003	0.275009	0.410048	2.29614	0.0353368
chrX	39679655	39679856	201	chrX:39679655-39679856	1.56606	0.729899	0.836162	0.372502	0.298894	5.29047	1.68e-05
chrX	39704123	39704323	200	chrX:39704123-39704323	0.970884	1.60432	-0.633434	0.208984	0.243866	-2.74457	0.0124744
chrX	39749188	39754307	5119	chrX:39749188-39754307	0.605351	0.387936	0.217415	0.405711	0.765315	3.89094	0.000112402
chrX	39756076	39759738	3662	chrX:39756076-39759738	0.720047	0.133313	0.586734	0.474805	0.327213	10.5943	5.34e-23
chrX	39776812	39777204	392	chrX:39776812-39777204	1.30532	1.56462	-0.259303	0.439956	0.57246	-1.96692	0.0561866
chrX	39806363	39807445	1082	chrX:39806363-39807445	1.42448	0.88339	0.541087	0.466031	0.423296	5.81297	5.21e-08
chrX	39808331	39808640	309	chrX:39808331-39808640	1.30225	0.242727	1.05952	0.625661	0.197278	7.01625	2.06e-08
chrX	39816518	39819389	2871	chrX:39816518-39819389	1.52069	1.3853	0.135384	0.377408	0.298311	2.39411	0.0172822
chrX	39822005	39822224	219	chrX:39822005-39822224	1.36364	1.59457	-0.230935	0.426673	0.29296	-1.74624	0.0916798
chrX	39822789	39823333	544	chrX:39822789-39823333	0.11461	1.55946	-1.44485	0.402945	0.643458	-12.3317	1.48e-19
chrX	39827585	39828473	888	chrX:39827585-39828473	0.578328	0.0725084	0.50582	0.43415	0.917102	4.43602	2.92e-05
chrX	39829170	39829650	480	chrX:39829170-39829650	0.164748	1.33857	-1.17383	0.333692	0.38145	-9.26926	1.26e-11
chrX	39830733	39831343	610	chrX:39830733-39831343	0.875597	0.976667	-0.101069	0.384373	0.418226	-1.03234	0.305285
chrX	39834129	39836779	2650	chrX:39834129-39836779	0.570545	0.232185	0.33836	0.508269	0.339188	4.42358	1.41e-05
chrX	39838312	39844806	6494	chrX:39838312-39844806	0.326256	-0.211099	0.537355	0.544834	0.520119	9.41108	9.3e-20
chrX	39846463	39847603	1140	chrX:39846463-39847603	1.13815	0.329009	0.809143	0.683973	0.248474	7.61498	8.29e-12
chrX	39848195	39854342	6147	chrX:39848195-39854342	0.558222	0.00052409	0.557698	0.496459	0.448605	10.7249	1.04e-24
chrX	39866871	39867145	274	chrX:39866871-39867145	1.436	0.726414	0.709586	0.436152	0.450785	4.51156	8.84e-05
chrX	39889131	39892684	3553	chrX:39889131-39892684	0.516528	-0.00936657	0.525894	0.522354	0.957615	7.30662	2.29e-12
chrX	39895709	39901318	5609	chrX:39895709-39901318	0.660001	0.0326407	0.62736	0.550431	0.50305	11.7848	6.4e-29
chrX	39902271	39903002	731	chrX:39902271-39903002	0.282026	-0.00326838	0.285294	0.458686	0.475377	1.9798	0.0521721
chrX	39911414	39914320	2906	chrX:39911414-39914320	0.520815	-0.176374	0.697189	0.525491	0.450751	9.26129	4.27e-18
chrX	39915423	39917263	1840	chrX:39915423-39917263	0.207034	-0.0605104	0.267544	0.449323	0.655269	2.67555	0.00832783
chrX	39918280	39921557	3277	chrX:39918280-39921557	0.219044	-0.212443	0.431487	0.486165	0.848946	5.54015	6.29e-08
chrX	39922250	39922490	240	chrX:39922250-39922490	0.607667	-0.171111	0.778778	0.199473	0.652604	4.76293	7.23e-05
chrX	39949536	39950079	543	chrX:39949536-39950079	1.46202	0.186578	1.27544	0.567384	0.287003	10.4408	2.15e-15
chrX	39981947	39982246	299	chrX:39981947-39982246	0.568523	0.150152	0.418371	0.265705	0.407841	3.24406	0.00274884
chrX	39987901	39988104	203	chrX:39987901-39988104	0.136477	1.40833	-1.27186	0.434085	0.345775	-7.91169	1.83e-07
chrX	39989809	39990016	207	chrX:39989809-39990016	1.10136	0.598864	0.5025	0.255139	0.453381	3.05496	0.00903934
chrX	39993071	39993270	199	chrX:39993071-39993270	1.11664	1.04367	0.0729622	0.371975	0.441781	0.47687	0.638805
chrX	40010859	40012084	1225	chrX:40010859-40012084	0.282773	-0.118763	0.401535	0.435918	0.619876	4.61961	9.61e-06
chrX	40042979	40043307	328	chrX:40042979-40043307	1.35943	0.824905	0.534526	0.523754	0.526115	3.56114	0.000974544
chrX	40044830	40045030	200	chrX:40044830-40045030	0.81103	0.897651	-0.0866213	0.409444	0.70049	-0.499341	0.621104
chrX	40103322	40105088	1766	chrX:40103322-40105088	1.64328	0.885316	0.757962	0.440046	0.407605	9.35224	2.01e-17
chrX	40129770	40129972	202	chrX:40129770-40129972	0.91497	0.435	0.47997	0.328296	0.254512	3.56	0.00126475
chrX	40179707	40179906	199	chrX:40179707-40179906	1.09473	0.858864	0.235864	0.278375	0.371729	1.72679	0.101546
chrX	40283449	40283648	199	chrX:40283449-40283648	0.297091	0.254167	0.0429242	0.191004	0.406142	0.304675	0.763199
chrX	40324630	40325768	1138	chrX:40324630-40325768	0.702235	-0.255404	0.957639	0.477339	0.221445	9.953	1.1e-17
chrX	40366047	40366306	259	chrX:40366047-40366306	0.897879	0.766439	0.13144	0.362106	0.505908	0.969624	0.340142
chrX	40367208	40368318	1110	chrX:40367208-40368318	1.43244	0.0484407	1.384	0.675778	0.24761	13.9373	2.06e-26
chrX	40390994	40392085	1091	chrX:40390994-40392085	-0.0262479	-0.28927	0.263022	0.454397	0.586413	2.04913	0.0432366
chrX	40479275	40480718	1443	chrX:40479275-40480718	-0.529267	-0.466389	-0.0628778	0.400997	0.776885	-0.430857	0.667332
chrX	40576337	40577471	1134	chrX:40576337-40577471	1.26638	0.37452	0.891859	0.449029	0.38087	9.79784	2.88e-17
chrX	40578415	40578658	243	chrX:40578415-40578658	1.00306	-0.0861112	1.08917	0.442155	0.298172	8.01017	5.22e-09
chrX	40679498	40680155	657	chrX:40679498-40680155	0.868606	0.101793	0.766813	0.766959	0.587098	2.91307	0.00658371
chrX	40820973	40821390	417	chrX:40820973-40821390	1.18641	0.256117	0.930292	0.655521	0.419034	5.83443	1.54e-06
chrX	40828441	40831054	2613	chrX:40828441-40831054	-0.0264328	-0.0611515	0.0347187	0.493997	0.485691	0.342477	0.732325
chrX	40997656	40998213	557	chrX:40997656-40998213	0.882195	0.0529005	0.829294	0.456966	0.229579	7.45484	1.29e-10
chrX	41020056	41020955	899	chrX:41020056-41020955	-0.117852	-0.243078	0.125225	0.432509	0.72929	0.871041	0.386665
chrX	41022343	41022551	208	chrX:41022343-41022551	1.36176	0.80505	0.556707	0.332446	0.148066	5.25986	1.44e-05
chrX	41076810	41079631	2821	chrX:41076810-41079631	-0.172039	-0.213003	0.0409642	0.47141	0.372226	0.5537	0.580255
chrX	41186341	41187094	753	chrX:41186341-41187094	0.871182	0.0801704	0.791011	0.52672	0.475296	7.29984	1.42e-10
chrX	41216466	41218936	2470	chrX:41216466-41218936	1.1492	0.206178	0.943021	0.550309	0.274374	14.1764	1.58e-33
chrX	41259658	41259897	239	chrX:41259658-41259897	1.15933	1.39813	-0.238798	0.360939	0.371303	-1.53239	0.136983
chrX	41275123	41275322	199	chrX:41275123-41275322	0.9675	1.77626	-0.808763	0.39148	0.445202	-5.10365	2.39e-05
chrX	41420551	41420818	267	chrX:41420551-41420818	0.616	0.364432	0.251568	0.552949	0.293159	1.40724	0.167989
chrX	41666450	41668370	1920	chrX:41666450-41668370	0.738814	-0.298227	1.03704	0.540978	0.337813	10.7321	1.93e-21
chrX	42521825	42522416	591	chrX:42521825-42522416	1.36774	1.22271	0.145028	0.605645	0.232293	0.74802	0.457303
chrX	43022792	43023974	1182	chrX:43022792-43023974	1.64895	0.800587	0.84836	0.430654	0.549658	7.82328	1.72e-12
chrX	43398796	43400735	1939	chrX:43398796-43400735	1.00465	-0.0583334	1.06298	0.440914	0.293731	15.9501	1.81e-38
chrX	43626219	43626879	660	chrX:43626219-43626879	1.06429	-0.0107576	1.07504	0.532143	0.614362	8.59585	1.39e-12
chrX	43693981	43694204	223	chrX:43693981-43694204	0.101793	0.161591	-0.059798	0.23149	0.399545	-0.291017	0.773949
chrX	43713583	43713795	212	chrX:43713583-43713795	1.74508	1.76777	-0.0226893	0.458995	0.696749	-0.129112	0.89845
chrX	43717714	43717947	233	chrX:43717714-43717947	0.288455	0.0313637	0.257091	0.427198	0.135481	1.67586	0.103884
chrX	44027764	44028161	397	chrX:44027764-44028161	1.48695	1.40873	0.0782235	0.35411	0.411221	0.57187	0.570458
chrX	44029894	44030425	531	chrX:44029894-44030425	1.61472	1.82619	-0.211471	0.452525	0.208817	-1.48761	0.142671
chrX	44054279	44054847	568	chrX:44054279-44054847	1.21868	-0.257803	1.47648	0.629747	0.289757	11.3824	2.12e-16
chrX	44087645	44088810	1165	chrX:44087645-44088810	-0.119718	-0.32903	0.209312	0.442774	0.30023	1.78764	0.0770925
chrX	44286673	44287442	769	chrX:44286673-44287442	-0.449966	-0.213939	-0.236027	0.314152	0.121938	-2.18234	0.0327662
chrX	44377501	44377760	259	chrX:44377501-44377760	1.39382	0.624697	0.769121	0.458374	0.337895	4.25909	0.000177797
chrX	44588089	44588944	855	chrX:44588089-44588944	1.69073	1.5864	0.10433	0.356005	0.310373	1.10727	0.270985
chrX	44616392	44618568	2176	chrX:44616392-44618568	0.0311446	-0.145806	0.17695	0.528048	1.13754	1.54136	0.125036
chrX	44898111	44898315	204	chrX:44898111-44898315	0.898636	0.617677	0.280959	0.274556	0.277426	2.77325	0.0093763
chrX	44901845	44902222	377	chrX:44901845-44902222	1.43578	0.393545	1.04224	0.676305	0.364772	7.63153	2.39e-09
chrX	45125648	45126464	816	chrX:45125648-45126464	1.17659	0.347339	0.829252	0.502014	0.0941216	9.47429	1.39e-14
chrX	45376721	45376997	276	chrX:45376721-45376997	1.37764	0.496667	0.88097	0.397977	0.414634	5.06064	6.14e-05
chrX	45594621	45596346	1725	chrX:45594621-45596346	0.909404	0.0199284	0.889476	0.61156	0.27881	10.3381	3.02e-20
chrX	45728166	45728375	209	chrX:45728166-45728375	1.18509	0.926515	0.258576	0.463317	0.646299	0.748575	0.478122
chrX	45760708	45761105	397	chrX:45760708-45761105	1.4505	2.06445	-0.61395	0.295777	0.381245	-4.48462	9.94e-05
chrX	45803630	45804009	379	chrX:45803630-45804009	1.00151	0.668758	0.332751	0.344482	0.352055	2.499	0.0161316
chrX	46191113	46192069	956	chrX:46191113-46192069	0.795545	-0.261273	1.05682	0.40355	0.259423	11.2155	1.33e-19
chrX	46289470	46290271	801	chrX:46289470-46290271	0.852193	-0.106525	0.958718	0.413577	0.266247	8.99969	8.79e-14
chrX	46317910	46319915	2005	chrX:46317910-46319915	0.755864	0.0085682	0.747295	0.4668	0.508219	10.5509	4.8e-21
chrX	46351292	46351622	330	chrX:46351292-46351622	1.44682	1.39417	0.0526514	0.311858	0.305365	0.423609	0.674116
chrX	46502735	46504062	1327	chrX:46502735-46504062	0.8385	-0.114951	0.953451	0.477836	0.606842	11.4136	3.53e-22
chrX	46580905	46582114	1209	chrX:46580905-46582114	0.758447	-0.42701	1.18546	0.602816	0.405612	10.4904	9.86e-19
chrX	46656365	46658464	2099	chrX:46656365-46658464	0.944891	0.113705	0.831186	0.503362	0.733552	11.7283	8.88e-25
chrX	46822385	46823263	878	chrX:46822385-46823263	1.30438	0.139596	1.16479	0.577003	0.219877	12.0118	2.47e-20
chrX	46828747	46828960	213	chrX:46828747-46828960	1.40067	1.27505	0.125616	0.254965	0.307253	1.10856	0.276926
chrX	46873480	46874266	786	chrX:46873480-46874266	0.896523	0.192983	0.70354	0.276964	0.569602	7.05565	4.12e-10
chrX	46888545	46890128	1583	chrX:46888545-46890128	0.912283	-0.258476	1.17076	0.531345	0.787817	14.0129	1.57e-30
chrX	46901255	46901758	503	chrX:46901255-46901758	1.50711	0.746806	0.760301	0.50481	0.341237	6.55244	1.15e-08
chrX	46902603	46902817	214	chrX:46902603-46902817	1.44555	0.356364	1.08918	0.519909	0.131323	6.73375	4.52e-06
chrX	46913602	46913890	288	chrX:46913602-46913890	1.64352	0.780354	0.863162	0.494113	0.460503	5.89405	1.69e-06
chrX	46915240	46915673	433	chrX:46915240-46915673	1.41491	0.47625	0.938659	0.686867	0.514018	5.61708	1.99e-06
chrX	46917331	46917570	239	chrX:46917331-46917570	1.40152	1.07957	0.321944	0.353137	0.433188	1.97729	0.0574518
chrX	46919256	46919612	356	chrX:46919256-46919612	0.0927272	1.75101	-1.65828	0.449604	0.622927	-7.66767	6.38e-08
chrX	46920459	46920714	255	chrX:46920459-46920714	1.49045	0.92053	0.569924	0.36395	0.556595	2.45607	0.0252736
chrX	46922326	46922526	200	chrX:46922326-46922526	0.181553	1.54717	-1.36562	0.429825	0.247859	-10.1292	2.86e-12
chrX	46924230	46924484	254	chrX:46924230-46924484	1.48333	0.278131	1.2052	0.558806	0.27239	7.71869	3.19e-08
chrX	46930393	46930743	350	chrX:46930393-46930743	1.63441	0.22553	1.40888	0.683253	0.6153	7.73091	1.34e-09
chrX	46934840	46936246	1406	chrX:46934840-46936246	0.931618	-0.0581919	0.98981	0.322217	0.192917	17.5864	1.91e-39
chrX	46937922	46938721	799	chrX:46937922-46938721	0.00333333	-0.20995	0.213283	0.398179	0.590866	1.8918	0.0616159
chrX	46943052	46943380	328	chrX:46943052-46943380	1.70295	1.59839	0.104564	0.356155	0.210114	1.15828	0.253446
chrX	46950232	46950650	418	chrX:46950232-46950650	1.59264	1.50764	0.0849999	0.344861	0.357203	0.797443	0.428758
chrX	46959071	46959350	279	chrX:46959071-46959350	1.80309	1.24212	0.56097	0.363172	0.377375	4.31096	0.000160017
chrX	46961973	46964065	2092	chrX:46961973-46964065	0.334582	-0.17829	0.512872	0.550066	0.703712	4.0117	8.42e-05
chrX	46971349	46971549	200	chrX:46971349-46971549	1.47233	1.06909	0.403242	0.291276	0.329156	3.33728	0.00221304
chrX	46977110	46978335	1225	chrX:46977110-46978335	0.856061	0.00188131	0.854179	0.559176	0.388334	8.78686	8.11e-15
chrX	46986437	46986664	227	chrX:46986437-46986664	1.65236	1.17455	0.477818	0.372542	0.161216	3.43614	0.00176101
chrX	46987752	46988028	276	chrX:46987752-46988028	1.76495	1.36174	0.403212	0.469957	0.317081	2.58665	0.0133739
chrX	46988679	46988890	211	chrX:46988679-46988890	0.157424	2.08083	-1.92341	0.573108	0.503875	-10.8654	1.9e-08
chrX	46989718	46989917	199	chrX:46989718-46989917	1.31509	0.758447	0.556644	0.61667	0.435094	2.58874	0.0182939
chrX	46992042	46992577	535	chrX:46992042-46992577	1.48755	1.04211	0.445437	0.737937	0.410962	2.90408	0.00510383
chrX	47018555	47018754	199	chrX:47018555-47018754	0.950909	0.475682	0.475227	0.223463	0.234163	2.18581	0.0409568
chrX	47065644	47066673	1029	chrX:47065644-47066673	1.4523	1.07706	0.375242	0.42311	0.464738	4.63852	9.24e-06
chrX	47081164	47081363	199	chrX:47081164-47081363	0.434153	1.71881	-1.28466	0.270594	0.609796	-13.0528	1.6e-16
chrX	47110554	47111144	590	chrX:47110554-47111144	0.582169	0.298149	0.28402	0.680653	0.979017	1.54259	0.1276
chrX	47226727	47228231	1504	chrX:47226727-47228231	0.740659	-0.165625	0.906284	0.449823	0.376039	11.6798	1.39e-23
chrX	47257345	47258136	791	chrX:47257345-47258136	0.687414	-0.103502	0.790916	0.564618	0.349022	7.1842	1.48e-10
chrX	47267697	47268492	795	chrX:47267697-47268492	0.883239	0.104508	0.778731	0.500384	0.442805	7.8857	9.59e-12
chrX	47300712	47301006	294	chrX:47300712-47301006	0.851667	-0.215606	1.06727	0.31558	0.445515	7.84638	9.67e-09
chrX	47305176	47306105	929	chrX:47305176-47306105	0.963313	-0.291128	1.25444	0.403298	0.383239	13.6324	3.22e-24
chrX	47313022	47313224	202	chrX:47313022-47313224	1.10612	0.518485	0.587636	0.366461	0.38433	3.61588	0.00106517
chrX	47316250	47316449	199	chrX:47316250-47316449	1.17958	1.3051	-0.125525	0.457858	0.474442	-0.740787	0.464714
chrX	47318286	47319164	878	chrX:47318286-47319164	0.895329	0.188693	0.706636	0.458124	0.539295	7.37799	9.67e-11
chrX	47323234	47323433	199	chrX:47323234-47323433	1.3497	0.905076	0.444621	0.464071	0.257867	2.68131	0.0123049
chrX	47326590	47327174	584	chrX:47326590-47327174	1.1005	0.415467	0.685033	0.763028	0.832933	4.23965	8.53e-05
chrX	47329508	47329784	276	chrX:47329508-47329784	1.30509	0.816616	0.488475	0.349085	0.627848	2.47658	0.019015
chrX	47363381	47364652	1271	chrX:47363381-47364652	1.03877	0.218572	0.820197	0.507045	0.389006	8.56013	1.96e-14
chrX	47367853	47368910	1057	chrX:47367853-47368910	1.13402	0.108444	1.02557	0.352938	0.348042	12.1098	1.87e-22
chrX	47370687	47370886	199	chrX:47370687-47370886	1.56636	0.742727	0.823636	0.362592	0.344432	5.10751	5.91e-05
chrX	47378557	47379865	1308	chrX:47378557-47379865	1.19409	1.52194	-0.327852	0.33254	0.183141	-1.41751	0.181828
chrX	47382037	47382384	347	chrX:47382037-47382384	0.94025	0.126212	0.814038	0.661813	0.483947	4.4513	6.52e-05
chrX	47394169	47395632	1463	chrX:47394169-47395632	1.04213	0.337268	0.70486	0.398037	0.333625	10.5091	5.32e-20
chrX	47402910	47403908	998	chrX:47402910-47403908	1.11626	-0.128841	1.2451	0.528416	0.546083	11.3693	4.74e-20
chrX	47463309	47463617	308	chrX:47463309-47463617	0.704182	0.216042	0.48814	0.402089	0.306514	2.62359	0.0121029
chrX	47465652	47466051	399	chrX:47465652-47466051	1.51148	1.32193	0.189545	0.375984	0.37994	1.68991	0.0985413
chrX	47547445	47547885	440	chrX:47547445-47547885	0.813927	0.0491212	0.764806	0.517394	0.172668	4.53412	3.35e-05
chrX	47548936	47549140	204	chrX:47548936-47549140	0.85601	1.49369	-0.637677	0.450013	0.226089	-4.14815	0.000217391
chrX	47580718	47581479	761	chrX:47580718-47581479	0.766398	-0.627604	1.394	0.388835	0.34513	13.7997	2.39e-23
chrX	47747669	47749001	1332	chrX:47747669-47749001	0.661104	0.0565639	0.60454	0.528766	0.890096	5.33744	3.47e-07
chrX	47750922	47751158	236	chrX:47750922-47751158	1.45591	1.49727	-0.0413636	0.803004	0.490335	-0.196417	0.845775
chrX	47764908	47766095	1187	chrX:47764908-47766095	0.473136	-0.312644	0.78578	0.30959	0.634316	8.03481	1.74e-12
chrX	47770648	47771220	572	chrX:47770648-47771220	1.37106	1.32223	0.0488355	0.357292	0.232797	0.472833	0.637729
chrX	47815474	47816269	795	chrX:47815474-47816269	1.03732	0.211979	0.825339	0.467607	0.31417	7.2889	1.42e-10
chrX	47864369	47864614	245	chrX:47864369-47864614	0.0331894	2.03424	-2.00105	0.318135	0.471475	-14.3501	3.04e-06
chrX	47865438	47865637	199	chrX:47865438-47865637	1.41018	1.15384	0.256343	0.341248	0.350185	1.87234	0.0706206
chrX	47871518	47871869	351	chrX:47871518-47871869	0.629727	1.01405	-0.384326	0.264539	0.526012	-2.45599	0.0197793
chrX	47873831	47874082	251	chrX:47873831-47874082	1.88648	1.45649	0.429993	0.922195	0.762875	1.95518	0.0641153
chrX	47941132	47941343	211	chrX:47941132-47941343	1.40485	1.11775	0.287096	0.327908	0.277425	1.93802	0.0622732
chrX	48011175	48011422	247	chrX:48011175-48011422	1.65345	1.71462	-0.0611667	0.270262	0.493318	-0.366133	0.718114
chrX	48051079	48051288	209	chrX:48051079-48051288	0.02637	1.62894	-1.60257	0.178634	0.296575	-20.1229	1.12e-23
chrX	48101042	48101421	379	chrX:48101042-48101421	1.37316	1.19636	0.176795	0.324639	0.0586395	1.58859	0.119715
chrX	48127722	48128035	313	chrX:48127722-48128035	1.42888	1.55245	-0.123571	0.461565	0.334141	-0.714712	0.480137
chrX	48131698	48131901	203	chrX:48131698-48131901	0.00112476	1.62394	-1.62281	0.283045	0.544061	-10.8693	3.13e-09
chrX	48137124	48137331	207	chrX:48137124-48137331	0.457013	2.09652	-1.6395	0.284049	0.314935	-9.94657	9.14e-09
chrX	48152306	48152509	203	chrX:48152306-48152509	1.09883	1.61057	-0.511743	0.261046	0.523509	-3.27302	0.00248822
chrX	48156175	48156485	310	chrX:48156175-48156485	-0.261473	1.93364	-2.19511	0.237643	0.421133	-34.658	2.33e-40
chrX	48203907	48204134	227	chrX:48203907-48204134	1.23433	1.32702	-0.092687	0.726722	0.268769	-0.435288	0.666509
chrX	48211523	48211781	258	chrX:48211523-48211781	1.11509	0.526667	0.588424	0.21291	0.311524	3.95236	0.00082401
chrX	48214223	48214432	209	chrX:48214223-48214432	1.32852	1.56884	-0.240323	0.37101	0.172081	-1.95179	0.0600609
chrX	48219158	48220152	994	chrX:48219158-48220152	0.647421	0.0990014	0.54842	0.667476	1.19077	4.22417	4.74e-05
chrX	48221296	48221501	205	chrX:48221296-48221501	0.896091	0.921705	-0.0256137	0.376038	0.190927	-0.196783	0.846134
chrX	48251631	48252854	1223	chrX:48251631-48252854	1.16521	0.429534	0.735676	0.488792	0.492419	8.72373	7.95e-15
chrX	48254597	48254806	209	chrX:48254597-48254806	1.11641	1.2122	-0.0957878	0.379851	0.261918	-0.578583	0.569575
chrX	48264669	48265786	1117	chrX:48264669-48265786	1.08497	-0.0826997	1.16767	0.414779	0.223206	14.4627	7.46e-28
chrX	48282613	48283596	983	chrX:48282613-48283596	1.03186	0.125583	0.90628	0.685901	0.600688	7.91242	3.17e-12
chrX	48302498	48303593	1095	chrX:48302498-48303593	1.64954	0.877355	0.772182	0.442491	0.189674	8.80096	1.28e-14
chrX	48317412	48318443	1031	chrX:48317412-48318443	0.89881	0.434153	0.464657	0.323278	0.29764	5.38682	3.68e-07
chrX	48340612	48343944	3332	chrX:48340612-48343944	1.39493	0.437139	0.957789	0.602343	0.243791	15.603	2.09e-42
chrX	48348147	48348599	452	chrX:48348147-48348599	1.15762	0.548576	0.609042	0.378866	0.109152	4.79451	1.37e-05
chrX	48419119	48420289	1170	chrX:48419119-48420289	1.01189	-0.0566666	1.06855	0.375123	0.320211	14.1132	1.07e-27
chrX	48427195	48427408	213	chrX:48427195-48427408	0.909636	0.226591	0.683046	0.584345	0.267123	3.29713	0.00367409
chrX	48431544	48431755	211	chrX:48431544-48431755	1.53709	0.933737	0.603353	0.490277	0.341377	3.98492	0.000402936
chrX	48438852	48440678	1826	chrX:48438852-48440678	1.02311	0.2037	0.819415	0.42693	0.641867	10.6095	3.28e-21
chrX	48443587	48444185	598	chrX:48443587-48444185	1.37218	0.233561	1.13862	0.460616	0.274581	9.56153	6.16e-14
chrX	48449537	48449799	262	chrX:48449537-48449799	1.31485	0.311162	1.00369	0.590424	0.495252	5.31114	8.86e-06
chrX	48480359	48481345	986	chrX:48480359-48481345	0.915491	-0.177636	1.09313	0.294108	0.145228	15.3955	7.38e-29
chrX	48485176	48485381	205	chrX:48485176-48485381	1.66189	1.67265	-0.0107576	0.30785	0.21129	-0.0579824	0.954291
chrX	48516983	48517192	209	chrX:48516983-48517192	1.382	1.45977	-0.0777728	0.318276	0.403558	-0.531547	0.60149
chrX	48526228	48526450	222	chrX:48526228-48526450	1.45412	0.795556	0.658566	0.513034	0.521128	3.18466	0.00333434
chrX	48544529	48545985	1456	chrX:48544529-48545985	0.969812	0.26598	0.703832	0.453723	0.247619	8.59457	9.54e-15
chrX	48561625	48561824	199	chrX:48561625-48561824	1.31718	0.648636	0.668545	0.444174	0.410063	3.63164	0.00174473
chrX	48569532	48571120	1588	chrX:48569532-48571120	1.10201	0.271684	0.830321	0.576719	0.509812	9.57804	7.44e-18
chrX	48574482	48575941	1459	chrX:48574482-48575941	1.07572	0.0466818	1.02904	0.56174	0.734825	12.4496	1.97e-25
chrX	48578235	48579160	925	chrX:48578235-48579160	0.869788	0.26335	0.606438	0.647451	0.376649	5.15817	1.33e-06
chrX	48590897	48591096	199	chrX:48590897-48591096	1.06482	0.0981061	0.966712	0.418972	0.184143	6.4211	6.5e-06
chrX	48633230	48634499	1269	chrX:48633230-48634499	1.07881	0.0204196	1.05839	0.415217	0.27152	11.7021	2.4e-22
chrX	48639280	48640854	1574	chrX:48639280-48640854	1.02742	-0.168291	1.19571	0.395583	0.306649	15.1915	3.14e-33
chrX	48644428	48644834	406	chrX:48644428-48644834	1.84865	1.76606	0.082594	0.493051	0.443328	0.533233	0.596321
chrX	48647003	48647202	199	chrX:48647003-48647202	1.54523	1.04833	0.496894	0.606442	0.532699	2.10811	0.0479373
chrX	48653108	48654568	1460	chrX:48653108-48654568	0.754987	0.227933	0.527054	0.550295	0.189853	5.4098	2.81e-07
chrX	48659366	48659755	389	chrX:48659366-48659755	1.07225	0.407046	0.665204	0.466866	0.297805	4.55438	5.66e-05
chrX	48660604	48661867	1263	chrX:48660604-48661867	0.832212	0.0094634	0.822749	0.453976	0.394423	9.85274	2.09e-17
chrX	48699071	48700900	1829	chrX:48699071-48700900	1.00282	-0.110504	1.11332	0.490853	0.292403	13.7669	4.49e-30
chrX	48708275	48708474	199	chrX:48708275-48708474	-0.367064	2.12394	-2.491	0.633552	0.396351	-12.4198	2.7e-10
chrX	48710657	48711645	988	chrX:48710657-48711645	1.16964	0.252932	0.916705	0.554718	0.279946	8.18867	8.79e-13
chrX	48724524	48724849	325	chrX:48724524-48724849	1.40314	1.33197	0.0711666	0.498393	0.10619	0.565228	0.575462
chrX	48743053	48744047	994	chrX:48743053-48744047	0.638882	0.292	0.346882	0.307397	0.158289	3.31671	0.00128464
chrX	48783600	48783799	199	chrX:48783600-48783799	1.24209	0.324621	0.917469	0.537958	0.327085	4.84943	0.000104255
chrX	48787274	48788699	1425	chrX:48787274-48788699	0.890915	0.0561201	0.834795	0.458687	0.365743	10.8442	1.19e-20
chrX	48797729	48798628	899	chrX:48797729-48798628	0.940064	0.367508	0.572556	0.701928	0.39633	4.82202	4.8e-06
chrX	48808817	48809045	228	chrX:48808817-48809045	0.840273	-0.111288	0.951561	0.432424	0.261843	6.41027	5.3e-06
chrX	48811592	48811825	233	chrX:48811592-48811825	1.50197	0.635328	0.866641	0.803848	0.148882	3.96715	0.000472628
chrX	48812379	48813191	812	chrX:48812379-48813191	1.69658	1.17854	0.518045	0.554521	0.340312	3.93083	0.000230467
chrX	48816485	48819025	2540	chrX:48816485-48819025	1.10877	0.386716	0.722053	0.719248	0.445957	8.79446	1.8e-16
chrX	48819871	48820070	199	chrX:48819871-48820070	1.64264	1.13375	0.508886	0.457038	0.173542	2.35778	0.0295848
chrX	48824208	48825054	846	chrX:48824208-48825054	0.940343	0.0101263	0.930217	0.650422	0.223351	7.37022	7.96e-11
chrX	48844553	48845657	1104	chrX:48844553-48845657	1.11056	-0.0297853	1.14035	0.403067	0.351449	14.4764	1.08e-28
chrX	48866640	48867258	618	chrX:48866640-48867258	0.898076	0.274293	0.623783	0.293651	0.231047	6.59659	9.67e-09
chrX	48898521	48900829	2308	chrX:48898521-48900829	0.963308	0.16309	0.800219	0.530019	0.196552	10.925	5.67e-23
chrX	48905972	48908643	2671	chrX:48905972-48908643	1.31181	0.61	0.701811	0.551011	0.68493	9.1065	1.34e-17
chrX	48909269	48910963	1694	chrX:48909269-48910963	0.752126	-0.127071	0.879197	0.457483	0.248316	12.9627	6.72e-28
chrX	48914854	48916176	1322	chrX:48914854-48916176	1.06263	0.0145995	1.04803	0.407309	0.340789	13.6669	1.06e-27
chrX	48918978	48919588	610	chrX:48918978-48919588	1.67808	0.183965	1.49411	0.66395	0.526275	10.3532	4.01e-15
chrX	48920316	48920516	200	chrX:48920316-48920516	1.00245	0.0910607	0.911394	0.541875	0.32849	5.29796	5.71e-05
chrX	48921288	48921771	483	chrX:48921288-48921771	1.39224	0.512061	0.880176	0.514304	0.525517	6.82544	8.64e-09
chrX	48927118	48928329	1211	chrX:48927118-48928329	1.33425	0.504575	0.829677	0.490338	0.398845	9.62748	4.04e-17
chrX	48929493	48930783	1290	chrX:48929493-48930783	1.38683	0.326719	1.06011	0.570135	0.285347	11.8247	7.66e-23
chrX	48934203	48935291	1088	chrX:48934203-48935291	0.898529	0.0978925	0.800636	0.470337	0.342497	9.51143	3.94e-16
chrX	48942619	48943922	1303	chrX:48942619-48943922	0.969792	0.301867	0.667925	0.625598	0.174949	5.92226	2.04e-08
chrX	48948521	48948759	238	chrX:48948521-48948759	1.42558	0.702727	0.722848	0.448022	0.265076	5.59324	4.61e-06
chrX	48952924	48953243	319	chrX:48952924-48953243	1.46727	0.636945	0.830328	0.458062	0.465761	4.67661	6.05e-05
chrX	48969297	48969522	225	chrX:48969297-48969522	1.15042	0.123788	1.02664	0.416451	0.527165	6.97587	9.73e-08
chrX	48970328	48970536	208	chrX:48970328-48970536	1.41158	1.01424	0.397333	0.528052	0.136544	2.12548	0.0423212
chrX	48971636	48972554	918	chrX:48971636-48972554	1.43077	0.914437	0.516329	0.384239	0.38501	4.9546	5.09e-06
chrX	48973568	48974624	1056	chrX:48973568-48974624	1.27487	0.497645	0.777226	0.418145	0.201164	10.1782	3.57e-18
chrX	48977182	48978003	821	chrX:48977182-48978003	1.29217	0.252509	1.03966	0.419411	0.36593	8.33925	4.79e-12
chrX	48978761	48979278	517	chrX:48978761-48979278	1.01295	0.512273	0.500682	0.293072	0.434309	3.21878	0.00335449
chrX	49004041	49004319	278	chrX:49004041-49004319	1.57423	0.84911	0.725117	0.419469	0.285433	5.37873	3.11e-06
chrX	49012321	49014250	1929	chrX:49012321-49014250	1.0587	0.20072	0.857976	0.592876	0.39396	10.3172	1.43e-20
chrX	49046953	49047184	231	chrX:49046953-49047184	1.39982	0.505417	0.894401	0.457182	0.408544	4.14378	0.000534515
chrX	49065363	49066128	765	chrX:49065363-49066128	1.825	0.368485	1.45652	0.759177	0.394052	4.08525	0.00375917
chrX	49240946	49241764	818	chrX:49240946-49241764	1.90636	0.23803	1.66833	0.828705	0.383235	4.399	0.00286124
chrX	49279016	49279521	505	chrX:49279016-49279521	1.51268	1.40452	0.108162	0.277846	0.274116	1.3859	0.171098
chrX	49346846	49347496	650	chrX:49346846-49347496	1.65553	1.30659	0.348942	0.354625	0.112149	3.88401	0.00022272
chrX	49480975	49481174	199	chrX:49480975-49481174	1.35255	0.726742	0.625803	0.293384	0.164266	5.99153	8.33e-06
chrX	49529965	49532201	2236	chrX:49529965-49532201	1.29117	0.325774	0.9654	0.444153	0.361295	10.8688	1.67e-22
chrX	49573615	49574750	1135	chrX:49573615-49574750	0.628273	-0.230013	0.858285	0.49615	0.553192	9.45219	2.16e-16
chrX	49855748	49856007	259	chrX:49855748-49856007	0.225667	0.0749494	0.150717	0.214699	0.288771	1.72274	0.0954237
chrX	50040914	50041371	457	chrX:50040914-50041371	1.80916	1.85027	-0.0411091	0.417096	0.0897164	-0.340419	0.735143
chrX	50228708	50229686	978	chrX:50228708-50229686	0.608491	-0.260242	0.868733	0.446393	0.366459	9.52884	8.04e-16
chrX	50230295	50231474	1179	chrX:50230295-50231474	0.979879	-0.173889	1.15377	0.399373	0.277929	12.8967	9.32e-23
chrX	50393977	50394206	229	chrX:50393977-50394206	1.91668	1.48924	0.427439	0.485748	0.522058	2.09633	0.0492511
chrX	50572573	50574465	1892	chrX:50572573-50574465	0.759073	-0.0579356	0.817008	0.499716	0.513129	11.6984	7.67e-25
chrX	50665063	50665454	391	chrX:50665063-50665454	1.31132	0.846364	0.464954	0.550372	0.119578	2.28094	0.0373973
chrX	51091500	51093264	1764	chrX:51091500-51093264	1.11039	0.191776	0.918618	0.449696	0.295718	9.53573	1e-17
chrX	51155391	51156124	733	chrX:51155391-51156124	0.955558	-0.0792965	1.03485	0.641247	0.296532	8.34271	7.76e-12
chrX	51166254	51167782	1528	chrX:51166254-51167782	1.42193	0.21544	1.20649	0.601799	0.224022	15.1431	2.32e-33
chrX	51255090	51257043	1953	chrX:51255090-51257043	1.12858	-0.0871628	1.21574	0.455356	0.256921	14.6581	1.11e-33
chrX	51377411	51378635	1224	chrX:51377411-51378635	1.13192	0.0547028	1.07722	0.589437	0.324807	10.8226	3.17e-20
chrX	51436314	51436541	227	chrX:51436314-51436541	1.02733	1.16813	-0.140798	0.232706	0.302583	-0.918906	0.365632
chrX	51438068	51438271	203	chrX:51438068-51438271	1.36421	1.46232	-0.0981111	0.354484	0.437453	-0.823138	0.416719
chrX	51441446	51442711	1265	chrX:51441446-51442711	1.29551	0.184889	1.11062	0.582658	0.291177	11.615	2.72e-22
chrX	51470151	51471416	1265	chrX:51470151-51471416	1.2022	0.0706527	1.13155	0.529074	0.384503	12.107	1.76e-23
chrX	51474591	51474794	203	chrX:51474591-51474794	1.51368	1.56659	-0.0529092	0.341096	0.178436	-0.395135	0.697017
chrX	51476317	51476550	233	chrX:51476317-51476550	1.13136	1.35515	-0.223788	0.285058	0.328978	-1.70119	0.0989304
chrX	51503045	51503951	906	chrX:51503045-51503951	0.611018	-0.303129	0.914147	0.459825	0.279091	8.27098	3.96e-13
chrX	51562849	51563432	583	chrX:51562849-51563432	0.462519	0.227857	0.234662	0.308715	0.207345	3.40922	0.00110483
chrX	51653093	51654855	1762	chrX:51653093-51654855	0.80746	0.48883	0.31863	0.575848	0.288508	3.63361	0.000356949
chrX	51683374	51683654	280	chrX:51683374-51683654	0.874182	0.485707	0.388475	0.302172	0.329146	2.92061	0.00670033
chrX	51819088	51819287	199	chrX:51819088-51819287	1.41555	1.39879	0.0167576	0.484923	0.539442	0.0779777	0.938686
chrX	51821028	51821300	272	chrX:51821028-51821300	1.50897	0.652752	0.856217	0.523166	0.0938818	4.7629	4.23e-05
chrX	51821878	51822402	524	chrX:51821878-51822402	1.7836	1.97432	-0.190718	0.470151	0.105379	-1.4821	0.144259
chrX	51825037	51825530	493	chrX:51825037-51825530	1.89132	1.35155	0.539765	0.471503	0.450054	5.20631	2.3e-06
chrX	51827173	51829457	2284	chrX:51827173-51829457	1.52171	0.318956	1.20276	0.559098	0.794819	15.0317	7.47e-37
chrX	51829984	51830190	206	chrX:51829984-51830190	1.07755	0.953409	0.124136	0.230749	0.437524	0.648107	0.524902
chrX	51943587	51943793	206	chrX:51943587-51943793	1.00636	0.936023	0.0703409	0.343172	0.366189	0.375806	0.711354
chrX	51944320	51946604	2284	chrX:51944320-51946604	1.52102	0.311173	1.20984	0.553543	0.354659	15.2595	1.37e-37
chrX	51948247	51948736	489	chrX:51948247-51948736	1.87862	1.46169	0.416929	0.471909	0.27851	3.90351	0.000231381
chrX	51951375	51951900	525	chrX:51951375-51951900	1.76887	1.9263	-0.15743	0.510633	0.722137	-1.19786	0.236306
chrX	51952477	51952747	270	chrX:51952477-51952747	1.62048	0.958384	0.662101	0.495903	0.405994	3.84966	0.000562429
chrX	51954401	51954600	199	chrX:51954401-51954600	1.36073	1.49447	-0.133742	0.39884	0.398238	-0.824581	0.419346
chrX	52021356	52022387	1031	chrX:52021356-52022387	-0.0962562	0.0163774	-0.112634	0.482438	0.530792	-0.663619	0.508664
chrX	52128672	52129576	904	chrX:52128672-52129576	1.44918	1.32937	0.119811	0.473347	0.329418	1.42099	0.158457
chrX	52255533	52256092	559	chrX:52255533-52256092	1.91126	1.78497	0.126283	0.57665	0.418732	1.05471	0.295663
chrX	52276540	52277099	559	chrX:52276540-52277099	1.73485	1.76518	-0.0303281	0.503652	0.487534	-0.246828	0.805838
chrX	52403048	52403951	903	chrX:52403048-52403951	1.30918	1.21961	0.0895757	0.424415	0.303437	0.841355	0.402054
chrX	52528484	52529043	559	chrX:52528484-52529043	1.79203	1.63021	0.161816	0.48487	0.128292	1.36417	0.177329
chrX	52549480	52550039	559	chrX:52549480-52550039	1.86398	1.77803	0.0859546	0.567232	0.319427	0.708425	0.481312
chrX	52562374	52562933	559	chrX:52562374-52562933	1.86929	1.79612	0.0731641	0.459375	0.243865	0.693413	0.490563
chrX	52589239	52589438	199	chrX:52589239-52589438	1.36779	0.771515	0.596273	0.237559	0.211092	7.03967	7.04e-08
chrX	52590011	52590299	288	chrX:52590011-52590299	1.634	1.44576	0.188242	0.339533	0.36439	1.54716	0.132197
chrX	52690294	52690511	217	chrX:52690294-52690511	1.88127	1.92977	-0.0485004	0.510071	0.39644	-0.177341	0.863177
chrX	52743156	52743359	203	chrX:52743156-52743359	0.22553	1.78909	-1.56356	0.390117	0.471203	-7.46332	3.93e-06
chrX	52748189	52748417	228	chrX:52748189-52748417	0.50404	1.19735	-0.693308	0.173877	0.229056	-6.20913	1.51e-06
chrX	52752913	52753144	231	chrX:52752913-52753144	1.44982	1.60909	-0.159273	0.301713	0.149725	-1.14472	0.267289
chrX	52796873	52797104	231	chrX:52796873-52797104	1.48191	1.43727	0.0446365	0.339524	0.470298	0.301479	0.76621
chrX	52801600	52801828	228	chrX:52801600-52801828	0.903636	1.14879	-0.245151	0.380944	0.13616	-1.70385	0.103914
chrX	52806660	52806863	203	chrX:52806660-52806863	1.69655	1.74833	-0.0517881	0.346773	0.347972	-0.246167	0.811307
chrX	52835416	52835617	201	chrX:52835416-52835617	0.139596	1.71428	-1.57468	0.314792	0.491862	-8.81455	8.87e-08
chrX	52857017	52857702	685	chrX:52857017-52857702	1.53016	0.909069	0.621086	0.366636	0.357104	6.02019	6.27e-08
chrX	52913342	52914080	738	chrX:52913342-52914080	1.44208	1.41907	0.0230076	0.432639	0.238837	0.246702	0.805727
chrX	52942544	52943920	1376	chrX:52942544-52943920	1.07338	-0.037202	1.11058	0.37308	0.354726	13.8762	2.39e-29
chrX	52953169	52953941	772	chrX:52953169-52953941	1.57602	1.02598	0.550038	0.402392	0.466883	4.76071	7.96e-06
chrX	52962875	52963082	207	chrX:52962875-52963082	0.238912	1.67386	-1.43495	0.350579	0.342234	-9.98284	1.71e-08
chrX	52966544	52967526	982	chrX:52966544-52967526	0.202848	0.163813	0.0390352	0.385602	0.455056	0.327861	0.743935
chrX	52980365	52981594	1229	chrX:52980365-52981594	-0.182315	-0.189644	0.00732976	0.442035	0.328305	0.0594853	0.95267
chrX	52984594	52984803	209	chrX:52984594-52984803	0.190785	1.68447	-1.49368	0.250541	0.223185	-10.82	6.55e-10
chrX	52993567	52994340	773	chrX:52993567-52994340	1.57838	0.935455	0.64292	0.426098	0.408066	6.0084	4.46e-08
chrX	53003578	53004953	1375	chrX:53003578-53004953	1.11548	-0.0252327	1.14071	0.414859	0.333189	14.9079	2.84e-31
chrX	53041014	53041857	843	chrX:53041014-53041857	0.624212	-0.128746	0.752958	0.382754	0.465625	8.11922	1.54e-12
chrX	53046290	53046991	701	chrX:53046290-53046991	0.993234	0.339221	0.654013	0.343723	0.387785	6.47963	8.87e-09
chrX	53117752	53118017	265	chrX:53117752-53118017	0.59006	0.537172	0.0528887	0.261066	0.348722	0.542432	0.591558
chrX	53122569	53123444	875	chrX:53122569-53123444	1.32996	0.294108	1.03585	0.460529	0.402409	10.1872	5.91e-17
chrX	53126986	53127207	221	chrX:53126986-53127207	0.979636	0.724697	0.254939	0.37355	0.257865	1.77987	0.0925951
chrX	53127778	53128875	1097	chrX:53127778-53128875	1.026	0.123044	0.902956	0.561707	0.277058	9.37703	6.2e-16
chrX	53134131	53135097	966	chrX:53134131-53135097	0.969818	-0.308121	1.27794	0.571943	0.687879	10.5483	3.82e-18
chrX	53139071	53140607	1536	chrX:53139071-53140607	0.832933	-0.115697	0.94863	0.438548	0.5662	10.8547	7.65e-21
chrX	53239092	53239293	201	chrX:53239092-53239293	1.554	0.0889395	1.46506	0.750187	0.283587	4.94851	7.77e-05
chrX	53263717	53263916	199	chrX:53263717-53263916	1.13591	1.72008	-0.584166	0.36616	0.386088	-3.86748	0.000761309
chrX	53270392	53271609	1217	chrX:53270392-53271609	-0.249936	-0.0869571	-0.162978	0.455116	1.31233	-1.30535	0.194836
chrX	53283972	53284171	199	chrX:53283972-53284171	1.44455	1.40098	0.0435607	0.269534	0.239854	0.307444	0.761689
chrX	53293934	53294151	217	chrX:53293934-53294151	1.25591	1.16472	0.0911868	0.270453	0.463841	0.641343	0.527606
chrX	53296163	53296837	674	chrX:53296163-53296837	1.36819	0.403442	0.964753	0.656166	0.284223	7.40906	1.77e-10
chrX	53300492	53300817	325	chrX:53300492-53300817	1.12473	0.420808	0.703919	0.327629	0.441976	4.46767	0.000104786
chrX	53312879	53313129	250	chrX:53312879-53313129	1.31145	0.947803	0.363651	0.351113	0.307043	2.8535	0.0099671
chrX	53335272	53335471	199	chrX:53335272-53335471	0.819949	1.40591	-0.58596	0.420054	0.203537	-2.64781	0.0140389
chrX	53365946	53367630	1684	chrX:53365946-53367630	0.59204	0.0217845	0.570256	0.54393	0.86266	6.09814	6.87e-09
chrX	53399851	53400120	269	chrX:53399851-53400120	0.872909	1.30483	-0.43192	0.349304	0.340898	-4.10813	0.000188747
chrX	53447198	53447400	202	chrX:53447198-53447400	0.419242	1.80818	-1.38894	0.226242	0.275384	-12.4909	4.94e-12
chrX	53452679	53452888	209	chrX:53452679-53452888	1.17491	0.900455	0.274454	0.317307	0.235966	1.9734	0.0637646
chrX	53465508	53466943	1435	chrX:53465508-53466943	0.0173091	-0.00483836	0.0221474	0.474331	0.82429	0.201285	0.840759
chrX	53469873	53470109	236	chrX:53469873-53470109	0.802197	1.89159	-1.08939	0.345766	0.482214	-6.50325	2.01e-07
chrX	53477614	53478320	706	chrX:53477614-53478320	0.839753	0.101082	0.738671	0.50705	0.665319	6.30904	1.78e-08
chrX	53484287	53485880	1593	chrX:53484287-53485880	0.557199	-0.140682	0.697881	0.496987	0.213491	7.41511	6.85e-12
chrX	53581130	53581425	295	chrX:53581130-53581425	-0.252955	1.2296	-1.48256	0.302367	0.384842	-8.94656	5.8e-11
chrX	53592970	53593184	214	chrX:53592970-53593184	1.28745	1.12992	0.15753	0.394473	0.264852	1.10572	0.277355
chrX	53624445	53624644	199	chrX:53624445-53624644	1.08321	0.859722	0.22349	0.492877	0.277288	1.1828	0.247015
chrX	53636108	53636312	204	chrX:53636108-53636312	0.847273	1.07045	-0.223182	0.218264	0.504803	-1.66614	0.107082
chrX	53726880	53728329	1449	chrX:53726880-53728329	0.787909	-0.515914	1.30382	0.383344	0.328981	15.6921	4.72e-34
chrX	53729719	53730775	1056	chrX:53729719-53730775	0.865255	0.310311	0.554944	0.519609	0.609968	5.33017	5.43e-07
chrX	54085701	54088237	2536	chrX:54085701-54088237	0.723164	-0.331323	1.05449	0.466612	0.423184	13.6118	1.16e-32
chrX	54225567	54226768	1201	chrX:54225567-54226768	1.10474	0.116543	0.988193	0.469818	0.490674	11.4071	8.13e-21
chrX	54400503	54402235	1732	chrX:54400503-54402235	1.02747	-0.0875401	1.11501	0.415491	0.36899	14.9726	9.86e-33
chrX	54466387	54466586	199	chrX:54466387-54466586	-0.103367	1.02061	-1.12397	0.284613	0.333644	-10.3694	4.55e-10
chrX	54483319	54484087	768	chrX:54483319-54484087	0.932091	-0.206799	1.13889	0.50758	0.500789	10.1721	2.4e-16
chrX	54526517	54526721	204	chrX:54526517-54526721	1.01927	0.419748	0.599525	0.617819	0.31722	3.6287	0.00125416
chrX	54538174	54539638	1464	chrX:54538174-54539638	1.07652	0.220498	0.856022	0.601992	0.781662	9.15862	3.53e-16
chrX	54572961	54574273	1312	chrX:54572961-54574273	0.951	-0.361504	1.3125	0.436331	0.340354	16.1549	7.11e-33
chrX	54682407	54683121	714	chrX:54682407-54683121	1.08825	-0.140097	1.22834	0.343262	0.298388	12.9944	6.89e-21
chrX	54801837	54802079	242	chrX:54801837-54802079	0.908788	0.301919	0.606869	0.248017	0.329172	5.41461	6.58e-06
chrX	54850754	54852394	1640	chrX:54850754-54852394	0.819107	0.450009	0.369098	0.525538	0.119371	4.89525	2.16e-06
chrX	54858403	54858676	273	chrX:54858403-54858676	0.823333	0.144697	0.678636	0.504878	0.239956	4.72615	5.69e-05
chrX	54964005	54965329	1324	chrX:54964005-54965329	0.657013	0.861953	-0.20494	0.441962	0.179735	-2.27751	0.0242011
chrX	54995048	54995296	248	chrX:54995048-54995296	1.35164	1.2003	0.151333	0.344892	0.355459	1.05195	0.300985
chrX	55043002	55043871	869	chrX:55043002-55043871	0.808414	-0.097138	0.905552	0.36784	0.308287	9.972	1.58e-16
chrX	55117960	55118704	744	chrX:55117960-55118704	1.6436	0.868517	0.77508	0.609778	0.129883	6.62897	8.34e-09
chrX	55131945	55132724	779	chrX:55131945-55132724	1.44772	1.1832	0.264519	0.351661	0.339637	2.88748	0.00480897
chrX	55203887	55204808	921	chrX:55203887-55204808	0.861218	-0.199508	1.06073	0.490036	0.173378	8.90914	2.84e-14
chrX	55263392	55264036	644	chrX:55263392-55264036	1.4939	1.42475	0.069145	0.3038	0.493081	0.756401	0.451868
chrX	55307403	55308019	616	chrX:55307403-55308019	1.43849	0.844664	0.593829	0.378116	0.323893	5.8991	1.16e-07
chrX	55323280	55323963	683	chrX:55323280-55323963	1.5961	1.19571	0.40039	0.420575	0.505678	3.2522	0.0017903
chrX	55494880	55496229	1349	chrX:55494880-55496229	0.724675	-0.498506	1.22318	0.417809	0.287666	15.902	5.92e-34
chrX	55531497	55533049	1552	chrX:55531497-55533049	0.937926	-0.15947	1.0974	0.381908	0.422109	13.7367	1.5e-29
chrX	55637116	55637327	211	chrX:55637116-55637327	0.915682	2.00937	-1.09369	0.384878	0.412555	-6.59476	2.23e-06
chrX	55700824	55701104	280	chrX:55700824-55701104	1.68533	1.19177	0.493566	0.565705	0.38779	3.11374	0.00438371
chrX	55760826	55761676	850	chrX:55760826-55761676	0.768121	-0.0266751	0.794796	0.399858	0.150636	9.16279	8.94e-15
chrX	55951205	55952069	864	chrX:55951205-55952069	0.446614	-0.28679	0.733403	0.355973	0.13203	7.6892	2.27e-11
chrX	56275266	56276527	1261	chrX:56275266-56276527	0.896617	-0.152868	1.04948	0.481969	0.133329	13.0983	1.66e-26
chrX	56327459	56327756	297	chrX:56327459-56327756	1.11366	0.968447	0.145212	0.230789	0.386285	1.35132	0.183847
chrX	56606580	56607291	711	chrX:56606580-56607291	0.730338	-0.371753	1.10209	0.496386	0.226202	7.70862	4.28e-11
chrX	56607799	56608124	325	chrX:56607799-56608124	0.886818	-0.536136	1.42295	0.426347	0.37935	8.36835	4.35e-10
chrX	56772248	56772812	564	chrX:56772248-56772812	0.13203	-0.275025	0.407056	0.446715	0.507908	2.9969	0.00387881
chrX	56807340	56807545	205	chrX:56807340-56807545	0.844667	0.802449	0.0422172	0.282536	0.203502	0.292715	0.771708
chrX	56811063	56811825	762	chrX:56811063-56811825	-0.0201916	1.51577	-1.53596	0.371846	0.251311	-17.9734	2.61e-30
chrX	56812640	56812950	310	chrX:56812640-56812950	1.47877	1.73489	-0.256114	0.483405	0.273472	-1.72622	0.091683
chrX	56814121	56814320	199	chrX:56814121-56814320	1.16461	1.29071	-0.126101	0.510391	0.419837	-0.668554	0.50977
chrX	56816197	56817227	1030	chrX:56816197-56817227	0.00329124	1.47596	-1.47267	0.42073	0.426696	-13.9285	1.29e-25
chrX	56818042	56818352	310	chrX:56818042-56818352	0.0162324	1.8096	-1.79337	0.441989	0.294614	-15.4544	3.4e-17
chrX	56819523	56819722	199	chrX:56819523-56819722	1.08697	1.39533	-0.308359	0.455676	0.162734	-1.79309	0.0830279
chrX	56821599	56822629	1030	chrX:56821599-56822629	1.1882	1.43949	-0.251292	0.35721	0.320181	-3.05196	0.00280636
chrX	56823444	56824030	586	chrX:56823444-56824030	1.09439	1.84109	-0.746699	0.357392	0.189826	-6.24933	9.67e-07
chrX	56827835	56828173	338	chrX:56827835-56828173	1.21382	1.47307	-0.25925	0.325615	0.682511	-2.03362	0.0494512
chrX	56838792	56839017	225	chrX:56838792-56839017	0.0416667	1.56864	-1.52697	0.302357	0.100529	-11.0871	1.11e-11
chrX	57037990	57038884	894	chrX:57037990-57038884	1.17058	0.144562	1.02601	0.3837	0.35948	11.0374	1.52e-18
chrX	57113414	57114172	758	chrX:57113414-57114172	1.21925	0.676894	0.542356	0.658309	0.167336	4.21155	6.69e-05
chrX	57164219	57165028	809	chrX:57164219-57165028	0.889071	0.0570876	0.831983	0.602067	0.352364	7.76255	1.77e-11
chrX	57180204	57180721	517	chrX:57180204-57180721	1.06412	0.307626	0.756495	0.660959	0.1821	5.26848	2.82e-06
chrX	57329828	57330189	361	chrX:57329828-57330189	0.0762728	-0.439242	0.515515	0.29967	0.344543	4.05581	0.000229272
chrX	57436487	57436698	211	chrX:57436487-57436698	0.932182	0.750076	0.182106	0.251156	0.341712	1.43331	0.168605
chrX	57635044	57636725	1681	chrX:57635044-57636725	1.06033	0.166237	0.894096	0.446627	0.131098	10.2313	5.86e-20
chrX	57721828	57722573	745	chrX:57721828-57722573	1.75172	0.573778	1.17794	0.76445	0.555027	8.99493	1.45e-13
chrX	57952091	57953752	1661	chrX:57952091-57953752	1.19918	0.187973	1.01121	0.426402	0.627777	11.7257	1.04e-23
chrX	57977682	57978043	361	chrX:57977682-57978043	1.25709	0.381364	0.875727	0.346139	0.358476	7.28491	8.02e-09
chrX	62436179	62436544	365	chrX:62436179-62436544	0.831091	0.588308	0.242783	0.379444	0.266145	1.57232	0.12825
chrX	62486958	62488315	1357	chrX:62486958-62488315	0.675706	-0.479237	1.15494	0.559907	0.348009	12.7985	5.47e-25
chrX	62774625	62774892	267	chrX:62774625-62774892	1.04812	0.843384	0.204737	0.310399	0.69702	1.3199	0.19654
chrX	62891025	62892048	1023	chrX:62891025-62892048	0.934661	-0.253719	1.18838	0.462591	0.365485	12.5572	2.02e-23
chrX	62921673	62921967	294	chrX:62921673-62921967	1.06115	-0.447601	1.50875	0.275493	0.350425	10.6182	3.37e-10
chrX	63069993	63070194	201	chrX:63069993-63070194	1.35536	1.18523	0.170137	0.247916	0.604876	0.861049	0.399985
chrX	63180581	63181213	632	chrX:63180581-63181213	0.910091	-0.10487	1.01496	0.887284	0.531189	6.02031	1.05e-07
chrX	63340857	63342979	2122	chrX:63340857-63342979	0.971438	0.0344077	0.93703	0.537482	0.332408	14.6277	7.31e-35
chrX	63531432	63532310	878	chrX:63531432-63532310	0.585836	-0.26272	0.848556	0.404193	0.291287	9.61471	4.9e-16
chrX	64112121	64112625	504	chrX:64112121-64112625	0.612515	-0.285126	0.897641	0.466448	0.261724	8.20518	2.55e-11
chrX	64113257	64113549	292	chrX:64113257-64113549	0.284341	-0.324773	0.609114	0.57136	0.681335	3.04376	0.004106
chrX	64171052	64172338	1286	chrX:64171052-64172338	0.900234	-0.0237067	0.92394	0.483534	0.243693	10.5217	4.2e-19
chrX	64543435	64544909	1474	chrX:64543435-64544909	0.740974	-0.105097	0.846071	0.514406	0.431072	9.72806	1.09e-17
chrX	64664740	64664939	199	chrX:64664740-64664939	1.01042	0.662929	0.347495	0.262215	0.402077	3.25544	0.00292607
chrX	64670849	64671731	882	chrX:64670849-64671731	0.800782	-0.564621	1.3654	0.315855	0.140993	16.6249	2.17e-30
chrX	64688223	64689031	808	chrX:64688223-64689031	1.25232	0.0462689	1.20605	0.609242	0.171902	11.7344	2.87e-19
chrX	64804220	64804609	389	chrX:64804220-64804609	1.07009	0.181553	0.888538	0.45389	0.651247	5.48872	3.94e-06
chrX	64866048	64866247	199	chrX:64866048-64866247	1.32909	1.26096	0.0681315	0.240261	0.392748	0.484912	0.631282
chrX	64871824	64872028	204	chrX:64871824-64872028	1.10127	1.11273	-0.0114547	0.362015	0.236267	-0.0866443	0.931553
chrX	64958484	64959120	636	chrX:64958484-64959120	0.8155	0.0520202	0.76348	0.549107	0.204743	5.93712	1.56e-07
chrX	65092892	65093955	1063	chrX:65092892-65093955	1.25145	1.21607	0.035387	0.398344	0.530743	0.374326	0.708843
chrX	65107812	65108031	219	chrX:65107812-65108031	0.947818	0.17697	0.770849	0.365073	0.318011	5.34538	1.03e-05
chrX	65211607	65212290	683	chrX:65211607-65212290	1.88894	1.66831	0.220628	0.322689	0.41034	1.56854	0.131965
chrX	65574149	65574348	199	chrX:65574149-65574348	1.34067	1.50813	-0.167465	0.353635	0.252097	-1.17275	0.250111
chrX	65635586	65635810	224	chrX:65635586-65635810	1.4263	0.995606	0.430697	0.423806	0.265344	2.62669	0.0133886
chrX	65865400	65865745	345	chrX:65865400-65865745	0.642091	0.0652462	0.576845	0.227795	0.476905	6.11611	3.23e-07
chrX	66680306	66683437	3131	chrX:66680306-66683437	0.896182	-0.288221	1.1844	0.525418	0.29937	17.712	7.38e-50
chrX	67209644	67209891	247	chrX:67209644-67209891	0.108886	1.05702	-0.948134	0.27639	0.16797	-9.42675	9.24e-11
chrX	67269281	67269762	481	chrX:67269281-67269762	0.811136	0.0417424	0.769394	0.591405	0.294347	4.82577	2.67e-05
chrX	67569339	67570805	1466	chrX:67569339-67570805	0.829854	-0.257146	1.087	0.428327	0.187746	16.1305	1.36e-35
chrX	67634966	67636023	1057	chrX:67634966-67636023	0.770879	-0.0402272	0.811106	0.421769	0.484163	9.67462	5.41e-17
chrX	67736665	67736864	199	chrX:67736665-67736864	0.821697	0.921162	-0.0994647	0.418791	0.137883	-0.573775	0.570264
chrX	67784071	67784536	465	chrX:67784071-67784536	0.952873	0.0705152	0.882358	0.514438	0.33647	6.92083	6.19e-09
chrX	67822738	67823532	794	chrX:67822738-67823532	0.943586	0.196801	0.746785	0.438924	0.154519	8.13842	2.35e-12
chrX	67830027	67831025	998	chrX:67830027-67831025	0.869719	0.0630578	0.806661	0.490843	0.271824	9.10358	2.58e-15
chrX	67859442	67859642	200	chrX:67859442-67859642	1.35024	1.44727	-0.0970303	0.267624	0.169892	-0.682191	0.50021
chrX	67919912	67920405	493	chrX:67919912-67920405	0.870182	0.0280303	0.842151	0.471798	0.470036	7.14559	3.06e-09
chrX	67920932	67921600	668	chrX:67920932-67921600	-0.00598925	1.13158	-1.13757	0.328901	0.236548	-11.07	1.03e-18
chrX	67964426	67967127	2701	chrX:67964426-67967127	0.986977	-0.27138	1.25836	0.427142	0.228861	20.0628	2.82e-57
chrX	67968645	67968864	219	chrX:67968645-67968864	0.681455	0.790227	-0.108772	0.40358	0.379869	-0.678318	0.505401
chrX	67976815	67977210	395	chrX:67976815-67977210	1.4488	0.527394	0.921406	0.416297	0.439571	7.73214	3.69e-10
chrX	68012811	68013027	216	chrX:68012811-68013027	1.07045	1.52818	-0.457727	0.591162	0.490143	-2.75078	0.0105429
chrX	68031000	68031931	931	chrX:68031000-68031931	0.973355	-0.410523	1.38388	0.775857	0.371518	9.21887	3e-15
chrX	68048694	68049023	329	chrX:68048694-68049023	1.29582	0.231231	1.06459	0.716713	0.339818	5.66721	1.96e-06
chrX	68050005	68050204	199	chrX:68050005-68050204	1.42364	1.05646	0.367172	0.677126	0.495442	1.81467	0.0806047
chrX	68265077	68265644	567	chrX:68265077-68265644	0.948591	0.0392046	0.909386	0.537984	0.203101	7.88539	1.21e-10
chrX	68273405	68274002	597	chrX:68273405-68274002	1.24076	0.169066	1.07169	0.525274	0.379691	8.92789	7.6e-13
chrX	68286424	68286949	525	chrX:68286424-68286949	1.06767	0.0833332	0.984333	0.675355	0.302014	6.70447	7.88e-09
chrX	68298534	68299755	1221	chrX:68298534-68299755	1.35671	1.14867	0.208048	0.319492	0.136925	2.28207	0.0240913
chrX	68300894	68302265	1371	chrX:68300894-68302265	0.917909	0.496072	0.421838	0.586037	0.291568	3.77153	0.000236165
chrX	68310481	68310871	390	chrX:68310481-68310871	0.601939	-0.568611	1.17055	0.561417	0.316986	6.43633	3.74e-07
chrX	68357962	68358589	627	chrX:68357962-68358589	1.01143	0.194372	0.817056	0.565645	0.397753	6.29504	1.89e-08
chrX	68400658	68400894	236	chrX:68400658-68400894	0.918611	1.12126	-0.202651	0.410253	0.444189	-1.65542	0.10765
chrX	68414614	68414853	239	chrX:68414614-68414853	0.673576	0.247071	0.426505	0.46349	0.324161	3.10336	0.00410097
chrX	68422570	68423223	653	chrX:68422570-68423223	0.964727	0.154156	0.810571	0.437986	0.487258	7.25428	3.65e-10
chrX	68442131	68442774	643	chrX:68442131-68442774	0.933636	-0.00296533	0.936602	0.366559	0.250763	9.17709	1.46e-13
chrX	68640012	68642852	2840	chrX:68640012-68642852	0.912868	0.0235083	0.88936	0.500276	0.332864	15.5104	1.46e-40
chrX	68674873	68675491	618	chrX:68674873-68675491	1.2593	0.186162	1.07314	0.560497	0.382911	8.62505	4.07e-12
chrX	68752324	68753921	1597	chrX:68752324-68753921	0.944369	-0.0997206	1.04409	0.435823	0.526651	12.6691	1.9e-26
chrX	69074676	69074885	209	chrX:69074676-69074885	0.709864	0.189015	0.520848	0.211532	0.266815	2.76134	0.0120631
chrX	69171966	69172167	201	chrX:69171966-69172167	1.36164	1.69955	-0.337909	0.300772	0.357155	-2.50478	0.0159733
chrX	69198825	69200098	1273	chrX:69198825-69200098	1.61187	0.510192	1.10167	0.502558	0.577883	11.3999	1.67e-21
chrX	69269666	69270849	1183	chrX:69269666-69270849	0.86853	-0.456054	1.32458	0.34012	0.429488	15.2112	1.28e-30
chrX	69333892	69334095	203	chrX:69333892-69334095	0.782848	0.111212	0.671636	0.519708	0.400557	3.87037	0.00086608
chrX	69395324	69395951	627	chrX:69395324-69395951	1.58074	0.890736	0.690004	0.578771	0.269233	5.64441	2.9e-07
chrX	69418581	69418927	346	chrX:69418581-69418927	1.50582	0.512708	0.99311	0.750275	0.304626	5.50257	3.43e-06
chrX	69426205	69427275	1070	chrX:69426205-69427275	0.970562	-0.318581	1.28914	0.361834	0.138367	17.5887	6.84e-35
chrX	69560474	69560705	231	chrX:69560474-69560705	1.53582	1.52871	0.0071061	0.305421	0.251105	0.0431924	0.965992
chrX	69569954	69571531	1577	chrX:69569954-69571531	0.940674	-0.00598925	0.946663	0.504811	0.71295	11.5736	1.43e-23
chrX	69572848	69573194	346	chrX:69572848-69573194	0.664636	0.319432	0.345205	0.398469	0.196047	2.71951	0.00951755
chrX	69581166	69582088	922	chrX:69581166-69582088	0.798673	0.153955	0.644718	0.519276	0.580557	6.74862	7.72e-10
chrX	69586191	69586445	254	chrX:69586191-69586445	1.94115	1.34242	0.598727	0.694901	0.25209	2.93431	0.0063326
chrX	69588821	69589562	741	chrX:69588821-69589562	0.913307	0.0416667	0.87164	0.557781	0.271089	7.55651	4.18e-11
chrX	69591347	69592629	1282	chrX:69591347-69592629	0.793643	0.02331	0.770333	0.566692	0.343663	8.79579	4.69e-15
chrX	69614128	69614331	203	chrX:69614128-69614331	0.981394	0.733232	0.248162	0.37098	0.401123	1.93236	0.0626074
chrX	70044582	70045485	903	chrX:70044582-70045485	0.230624	1.48691	-1.25629	0.304543	0.36323	-13.6757	1.95e-26
chrX	70063979	70064202	223	chrX:70063979-70064202	1.19873	1.5453	-0.346576	0.360992	0.483393	-1.55592	0.137312
chrX	70067330	70067805	475	chrX:70067330-70067805	0.828145	0.0810607	0.747085	0.41434	0.30254	7.24406	2.06e-09
chrX	70153351	70153554	203	chrX:70153351-70153554	1.26612	0.902525	0.363596	0.406628	0.269101	2.28894	0.0298402
chrX	70189672	70190038	366	chrX:70189672-70190038	1.35259	0.625	0.727591	0.297792	0.282257	5.93582	5.01e-07
chrX	70204378	70205362	984	chrX:70204378-70205362	0.980054	-0.140364	1.12042	0.567564	0.400986	11.5061	3.93e-20
chrX	70232135	70233521	1386	chrX:70232135-70233521	0.762079	0.261338	0.50074	0.460367	0.376799	5.24012	4.96e-07
chrX	70237362	70237625	263	chrX:70237362-70237625	1.47045	1.23735	0.233106	0.412143	0.347393	1.36371	0.187816
chrX	70254868	70255862	994	chrX:70254868-70255862	0.946223	-0.374897	1.32112	0.517839	0.393949	11.4401	8.53e-21
chrX	70259084	70259286	202	chrX:70259084-70259286	1.46418	1.52303	-0.0588484	0.408142	0.268545	-0.390963	0.700135
chrX	70264473	70264672	199	chrX:70264473-70264672	1.69008	1.985	-0.294924	0.730056	0.342849	-1.32135	0.204776
chrX	70281194	70282411	1217	chrX:70281194-70282411	0.945196	0.640175	0.305021	0.674563	0.783574	2.43707	0.0160537
chrX	70284521	70284820	299	chrX:70284521-70284820	2.00776	1.2054	0.802354	0.459847	0.396253	4.51935	9.19e-05
chrX	70289971	70290246	275	chrX:70289971-70290246	1.53424	0.995808	0.538434	0.364179	0.495477	3.34045	0.00220719
chrX	70305910	70306642	732	chrX:70305910-70306642	1.47838	1.16927	0.309104	0.584897	0.503941	2.62234	0.0105275
chrX	70318488	70319086	598	chrX:70318488-70319086	0.644697	-0.511692	1.15639	0.54918	0.221007	9.32217	2.91e-13
chrX	70359541	70359843	302	chrX:70359541-70359843	1.5877	1.08341	0.504296	0.521338	0.272307	3.26592	0.00218661
chrX	70360653	70361153	500	chrX:70360653-70361153	1.47897	0.400404	1.07857	0.5865	0.255888	7.13273	1.67e-09
chrX	70377448	70377718	270	chrX:70377448-70377718	1.43259	1.54081	-0.108223	0.355529	0.28105	-0.738161	0.464525
chrX	70387637	70387838	201	chrX:70387637-70387838	0.941939	0.616465	0.325475	0.296358	0.185587	2.64361	0.0128754
chrX	70389967	70392053	2086	chrX:70389967-70392053	0.937918	0.149708	0.78821	0.5042	0.180268	11.4587	4.54e-24
chrX	70419988	70420871	883	chrX:70419988-70420871	0.761414	-0.823729	1.58514	0.471397	0.367192	13.1146	4.11e-22
chrX	70434330	70434621	291	chrX:70434330-70434621	-0.177636	1.37889	-1.55653	0.366253	0.483174	-13.1487	2.79e-13
chrX	70484688	70485133	445	chrX:70484688-70485133	1.82113	1.28262	0.538506	0.394272	0.239202	4.216	0.000111478
chrX	70502356	70504172	1816	chrX:70502356-70504172	0.990151	-0.0231818	1.01333	0.384659	0.428544	15.9064	6.76e-37
chrX	70533817	70534028	211	chrX:70533817-70534028	1.15467	1.33525	-0.180586	0.305523	0.513386	-1.208	0.236905
chrX	70557066	70557651	585	chrX:70557066-70557651	1.27738	0.00404039	1.27334	0.6556	0.265184	7.82845	7.17e-11
chrX	70628631	70629620	989	chrX:70628631-70629620	1.13973	0.159091	0.980636	0.398497	0.283726	8.5069	1.71e-13
chrX	70669302	70670919	1617	chrX:70669302-70670919	0.949166	-0.466684	1.41585	0.565014	0.37331	14.8118	1.57e-32
chrX	70683535	70683796	261	chrX:70683535-70683796	0.815212	0.00671717	0.808495	0.262717	0.282704	8.04765	4.95e-09
chrX	70714727	70715921	1194	chrX:70714727-70715921	1.4445	0.484744	0.959753	0.840758	0.551306	8.68495	1.93e-14
chrX	70740253	70740880	627	chrX:70740253-70740880	1.80924	1.38227	0.426964	0.479061	0.362886	3.20895	0.00233116
chrX	70753399	70754077	678	chrX:70753399-70754077	1.32539	0.432359	0.89303	0.659432	0.0976744	6.53467	7.49e-09
chrX	70798263	70798462	199	chrX:70798263-70798462	1.50136	0.960682	0.540682	0.313061	0.146805	4.46302	0.000240177
chrX	70801403	70801602	199	chrX:70801403-70801602	1.617	1.16909	0.447909	0.459779	0.38636	2.27998	0.0337245
chrX	70802923	70805169	2246	chrX:70802923-70805169	1.45743	0.386942	1.07049	0.576439	0.391574	16.6466	3.61e-41
chrX	70833397	70834008	611	chrX:70833397-70834008	0.802982	0.649	0.153982	0.274929	0.410505	1.43094	0.158351
chrX	70836700	70836899	199	chrX:70836700-70836899	1.575	1.84758	-0.272576	0.263589	0.381646	-1.71624	0.108247
chrX	70837991	70838194	203	chrX:70837991-70838194	-0.463845	0.864924	-1.32877	0.386934	0.192196	-8.5155	1.1e-07
chrX	70847739	70848728	989	chrX:70847739-70848728	1.51435	1.23289	0.281461	0.39618	0.308365	3.00455	0.00328896
chrX	70849395	70850123	728	chrX:70849395-70850123	1.74147	1.53846	0.203009	0.410924	0.387968	2.28503	0.0247902
chrX	70852755	70853038	283	chrX:70852755-70853038	1.68357	1.36818	0.315386	0.413923	0.31112	2.43182	0.0193747
chrX	70853917	70856193	2276	chrX:70853917-70856193	1.64464	0.256472	1.38816	0.658703	0.308088	18.7815	1.58e-49
chrX	70857259	70858600	1341	chrX:70857259-70858600	1.44268	1.23569	0.206989	0.354625	0.356982	2.60759	0.0100662
chrX	70860365	70860626	261	chrX:70860365-70860626	1.62061	1.45434	0.166263	0.433363	0.482576	1.02619	0.313646
chrX	70894062	70894319	257	chrX:70894062-70894319	0.258977	1.53871	-1.27973	0.492311	0.402527	-5.59134	1.72e-05
chrX	70896135	70897407	1272	chrX:70896135-70897407	1.44668	1.25172	0.194959	0.35963	0.421633	2.37793	0.0187598
chrX	70898542	70900818	2276	chrX:70898542-70900818	1.66618	0.275202	1.39098	0.644231	0.462723	19.5937	3.03e-53
chrX	70901697	70901980	283	chrX:70901697-70901980	1.79112	1.42679	0.364328	0.43025	0.360152	2.34536	0.0258812
chrX	70904524	70905339	815	chrX:70904524-70905339	1.5735	1.50854	0.0649583	0.415677	0.122472	0.640285	0.523692
chrX	70906007	70906996	989	chrX:70906007-70906996	1.55551	1.30036	0.255145	0.454917	0.35799	2.76802	0.00664256
chrX	70915136	70915379	243	chrX:70915136-70915379	-0.107225	0.88	-0.987225	0.494917	0.305597	-5.87009	1.05e-05
chrX	70916540	70916743	203	chrX:70916540-70916743	0.759667	1.02116	-0.261495	0.401483	0.230109	-1.88451	0.0689366
chrX	70917835	70918034	199	chrX:70917835-70918034	1.46952	1.59717	-0.127657	0.228211	0.426962	-1.04271	0.307258
chrX	70920726	70921335	609	chrX:70920726-70921335	0.827745	0.57097	0.256776	0.421179	0.290285	2.15267	0.0368261
chrX	71004348	71004596	248	chrX:71004348-71004596	1.6897	1.39154	0.298157	0.467997	0.484197	1.98277	0.0563718
chrX	71005562	71005823	261	chrX:71005562-71005823	0.923682	0.915682	0.00799987	0.343329	0.14727	0.0426145	0.966431
chrX	71009129	71010103	974	chrX:71009129-71010103	1.54275	0.212227	1.33053	0.675045	0.294204	12.7401	3.43e-22
chrX	71047108	71048677	1569	chrX:71047108-71048677	0.883284	-0.0610795	0.944364	0.504876	0.368166	12.3121	1.97e-25
chrX	71154947	71155561	614	chrX:71154947-71155561	0.817104	-0.00207795	0.819182	0.526525	0.34876	5.95759	8.46e-08
chrX	71163951	71164162	211	chrX:71163951-71164162	1.0143	1.12283	-0.108525	0.370047	0.313621	-0.763782	0.451
chrX	71181043	71181358	315	chrX:71181043-71181358	1.17455	1.46114	-0.286591	0.335919	0.1089	-2.12374	0.0433371
chrX	71191707	71192048	341	chrX:71191707-71192048	0.642454	0.642311	0.000143742	0.247688	0.313688	0.000912559	0.999277
chrX	71266313	71268977	2664	chrX:71266313-71268977	1.12079	0.359362	0.761432	0.484146	0.388744	9.50223	1.07e-18
chrX	71276354	71276702	348	chrX:71276354-71276702	1.29486	1.37042	-0.0755533	0.330178	0.337305	-0.61489	0.541994
chrX	71316647	71316847	200	chrX:71316647-71316847	1.16364	0.693535	0.470101	0.19464	0.402198	3.78715	0.0013031
chrX	71317735	71318688	953	chrX:71317735-71318688	0.534727	-0.291083	0.825811	0.2884	0.167474	9.97627	5.52e-17
chrX	71375193	71376081	888	chrX:71375193-71376081	1.05554	0.241052	0.814483	0.591407	0.455962	6.7665	1.05e-09
chrX	71391520	71392358	838	chrX:71391520-71392358	0.756205	-0.0278883	0.784093	0.570847	0.170273	6.74392	2.28e-09
chrX	71413269	71414060	791	chrX:71413269-71414060	0.188557	-0.1691	0.357657	0.478278	0.599563	2.3893	0.019448
chrX	71441390	71444673	3283	chrX:71441390-71444673	0.620281	-0.0491004	0.669382	0.492898	0.378452	11.2891	2.06e-25
chrX	71445344	71445645	301	chrX:71445344-71445645	-0.210636	-0.479773	0.269136	0.414147	0.640371	1.56949	0.124675
chrX	71708863	71709555	692	chrX:71708863-71709555	0.634597	-0.0224567	0.657054	0.359523	0.45317	7.73634	4.73e-11
chrX	71817115	71817506	391	chrX:71817115-71817506	0.746727	-0.499091	1.24582	0.461481	0.283439	5.48645	0.000492375
chrX	71850272	71851520	1248	chrX:71850272-71851520	0.995076	0.144861	0.850215	0.430813	0.5374	9.68583	7.81e-17
chrX	71852177	71852376	199	chrX:71852177-71852376	1.49944	1.79216	-0.292715	0.201219	0.487769	-3.55787	0.00158679
chrX	71913557	71913938	381	chrX:71913557-71913938	1.02459	0.0770455	0.947545	0.525636	0.431376	6.28661	1.61e-07
chrX	71917933	71918132	199	chrX:71917933-71918132	1.34856	2.21285	-0.864293	0.715035	0.889849	-3.87479	0.000607222
chrX	71919138	71919337	199	chrX:71919138-71919337	1.50661	1.47717	0.0294343	0.441503	0.256866	0.18767	0.852535
chrX	71929568	71929789	221	chrX:71929568-71929789	1.88505	1.92841	-0.0433586	0.21164	0.447735	-0.4042	0.689185
chrX	71941349	71941656	307	chrX:71941349-71941656	1.68609	2.10602	-0.419937	0.384477	0.487432	-3.06655	0.00428941
chrX	71943600	71944193	593	chrX:71943600-71944193	1.659	1.90734	-0.248336	0.559283	0.249076	-1.9776	0.052895
chrX	71979038	71979437	399	chrX:71979038-71979437	1.48949	1.61279	-0.123297	0.398955	0.364491	-1.11921	0.268131
chrX	72014521	72014906	385	chrX:72014521-72014906	1.56959	1.50341	0.0661819	0.348108	0.363049	0.547631	0.586855
chrX	72049764	72050357	593	chrX:72049764-72050357	-0.0898106	2.04314	-2.13295	0.54712	0.643943	-20.2146	2.56e-34
chrX	72052301	72052565	264	chrX:72052301-72052565	1.35745	2.12253	-0.765071	0.315227	0.492272	-6.30913	9.95e-08
chrX	72074610	72074809	199	chrX:72074610-72074809	1.52503	1.60472	-0.0796919	0.53953	0.300305	-0.559516	0.580462
chrX	72075637	72075836	199	chrX:72075637-72075836	1.53341	2.47626	-0.942854	0.542285	0.696149	-5.97562	2.57e-06
chrX	72080008	72080389	381	chrX:72080008-72080389	0.68803	0.0586869	0.629344	0.439423	0.302628	4.94482	2.75e-05
chrX	72139353	72140890	1537	chrX:72139353-72140890	1.28835	-0.0841667	1.37252	0.425249	0.514014	15.2723	7.41e-33
chrX	72215277	72216808	1531	chrX:72215277-72216808	1.17591	-0.108131	1.28404	0.449604	0.498842	13.6626	2.9e-28
chrX	72263239	72264706	1467	chrX:72263239-72264706	1.11746	1.2657	-0.14824	0.402097	0.254881	-1.3832	0.169474
chrX	72350727	72351492	765	chrX:72350727-72351492	0.529932	-0.227292	0.757223	0.348677	0.298443	7.61953	3.52e-11
chrX	72359544	72359857	313	chrX:72359544-72359857	1.04915	1.28422	-0.235066	0.229163	0.195134	-2.74726	0.00996132
chrX	72400621	72400820	199	chrX:72400621-72400820	1.07609	0.985076	0.0910152	0.263709	0.237089	0.67652	0.50735
chrX	72583140	72585362	2222	chrX:72583140-72585362	0.885364	-0.00695651	0.89232	0.382273	0.39921	13.6746	3.46e-32
chrX	72662558	72662819	261	chrX:72662558-72662819	-0.0350227	-0.320663	0.28564	0.499837	0.2371	1.83167	0.0744816
chrX	72699444	72700276	832	chrX:72699444-72700276	0.778023	-0.232386	1.01041	0.419245	0.680431	7.59506	3.66e-11
chrX	72905606	72905836	230	chrX:72905606-72905836	1.28124	0.596162	0.685081	0.265983	0.201003	4.02103	0.000422899
chrX	72987629	72988164	535	chrX:72987629-72988164	1.84273	1.73523	0.1075	0.286517	0.186231	1.45719	0.154039
chrX	72988738	72988952	214	chrX:72988738-72988952	1.39794	1.43035	-0.0324179	0.445462	0.25181	-0.224673	0.823716
chrX	73080580	73081169	589	chrX:73080580-73081169	-0.220491	-0.237273	0.0167817	0.534682	0.563502	0.0908618	0.927968
chrX	73202660	73202999	339	chrX:73202660-73202999	1.47145	0.150303	1.32115	0.615071	0.160265	7.80756	1.54e-08
chrX	73241777	73242385	608	chrX:73241777-73242385	1.09773	0.054495	1.04323	0.553185	0.206998	7.73443	1.51e-10
chrX	73299067	73299272	205	chrX:73299067-73299272	1.08424	0.286616	0.797626	0.54945	0.135733	4.54613	8.05e-05
chrX	73315165	73315386	221	chrX:73315165-73315386	0.775182	0.917652	-0.14247	0.305159	0.313804	-0.859918	0.400078
chrX	73323112	73323445	333	chrX:73323112-73323445	1.70227	1.93716	-0.234886	0.282584	0.330212	-1.85741	0.0693634
chrX	73428509	73430395	1886	chrX:73428509-73430395	0.386847	0.1712	0.215647	0.421193	0.407414	2.45986	0.0147191
chrX	73440580	73441444	864	chrX:73440580-73441444	1.41303	1.56615	-0.153123	0.389294	0.0996999	-1.8072	0.0743122
chrX	73535908	73536275	367	chrX:73535908-73536275	1.12518	0.10822	1.01696	0.559311	0.22183	8.09651	2.06e-09
chrX	73556443	73559781	3338	chrX:73556443-73559781	0.980027	0.117848	0.862179	0.538728	0.420116	15.0557	2.53e-40
chrX	73657473	73657672	199	chrX:73657473-73657672	1.24791	0.967348	0.280561	0.281246	0.342042	2.25134	0.0361023
chrX	73672203	73673607	1404	chrX:73672203-73673607	0.986948	0.0579492	0.928999	0.437824	0.179004	11.7856	3.49e-23
chrX	73750536	73751512	976	chrX:73750536-73751512	0.983655	-0.0366212	1.02028	0.41694	0.246621	11.6293	9.74e-21
chrX	74060509	74062628	2119	chrX:74060509-74062628	0.851099	-0.0328099	0.883909	0.521555	0.373185	13.9143	2.04e-32
chrX	74292575	74293023	448	chrX:74292575-74293023	0.6224	-0.25797	0.88037	0.378567	0.405309	6.10596	1.5e-07
chrX	74410536	74411225	689	chrX:74410536-74411225	0.942023	-0.418845	1.36087	0.366971	0.303847	15.6115	1.64e-26
chrX	74464187	74464499	312	chrX:74464187-74464499	1.28286	0.709848	0.573015	0.673094	0.225259	2.51021	0.021302
chrX	74659387	74659985	598	chrX:74659387-74659985	0.992303	-0.0956565	1.08796	0.417719	0.416769	10.5532	1.21e-15
chrX	74719204	74719423	219	chrX:74719204-74719423	0.677939	0.104849	0.573091	0.534142	0.183591	3.41571	0.00195279
chrX	74883344	74883685	341	chrX:74883344-74883685	0.636061	-0.0235606	0.659621	0.448759	0.307639	4.85068	5.24e-05
chrX	74918219	74918599	380	chrX:74918219-74918599	-0.10487	1.11866	-1.22353	0.283172	0.571677	-7.44715	6.28e-10
chrX	74921224	74922005	781	chrX:74921224-74922005	1.06627	0.28071	0.785562	0.292862	0.336998	9.57651	3.47e-15
chrX	75165916	75166294	378	chrX:75165916-75166294	1.2382	0.324413	0.913792	0.48607	0.538576	6.15425	2.57e-07
chrX	75281140	75282075	935	chrX:75281140-75282075	-0.472155	-0.271106	-0.201049	0.344275	0.531508	-1.42649	0.157066
chrX	75285525	75286455	930	chrX:75285525-75286455	-0.494418	-0.145189	-0.349229	0.331036	0.402064	-2.56681	0.012119
chrX	75309058	75310077	1019	chrX:75309058-75310077	0.787136	-0.496297	1.28343	0.379903	0.440005	10.9951	8.2e-18
chrX	75564275	75566036	1761	chrX:75564275-75566036	0.918192	0.00420038	0.913991	0.520335	0.361395	12.2818	4.52e-26
chrX	76927551	76928582	1031	chrX:76927551-76928582	0.756782	-0.120462	0.877244	0.426392	0.296723	9.22758	2.66e-15
chrX	77037150	77037911	761	chrX:77037150-77037911	0.718159	-0.774214	1.49237	0.424021	0.294987	15.8187	5.92e-25
chrX	77052476	77053123	647	chrX:77052476-77053123	0.532675	-0.419654	0.952329	0.412011	0.70642	7.93862	1.88e-11
chrX	77104813	77105016	203	chrX:77104813-77105016	1.02373	0.320606	0.703121	0.322654	0.330536	4.34407	0.000354987
chrX	77111485	77111913	428	chrX:77111485-77111913	1.37089	0.306182	1.06471	0.661782	0.421925	5.74243	5.32e-07
chrX	77245856	77247185	1329	chrX:77245856-77247185	0.909844	-0.412949	1.32279	0.404638	0.584782	15.0684	5.44e-31
chrX	77281220	77282075	855	chrX:77281220-77282075	1.14328	0.0373401	1.10594	0.322751	0.358977	13.0753	4.61e-23
chrX	78509028	78509560	532	chrX:78509028-78509560	0.725439	-0.212525	0.937965	0.54111	0.507178	7.5782	1.94e-10
chrX	79164432	79165128	696	chrX:79164432-79165128	1.01381	0.111894	0.901913	0.282348	0.412882	12.4233	7.18e-21
chrX	79167764	79167965	201	chrX:79167764-79167965	1.50736	1.16765	0.339712	0.211444	0.362153	2.72934	0.0154238
chrX	79477236	79477803	567	chrX:79477236-79477803	1.48103	0.366818	1.11421	0.521095	0.181392	9.07333	4.78e-13
chrX	79702759	79703022	263	chrX:79702759-79703022	1.3225	1.51044	-0.187936	0.405104	0.209182	-1.5256	0.134795
chrX	79715324	79717249	1925	chrX:79715324-79717249	1.18832	0.610902	0.577417	0.376059	0.267081	6.25264	2.11e-09
chrX	79950239	79952526	2287	chrX:79950239-79952526	0.737624	-0.294883	1.03251	0.457854	0.613044	13.4043	6.25e-31
chrX	80071926	80072388	462	chrX:80071926-80072388	-0.499091	1.80627	-2.30536	0.322907	0.473551	-11.458	1.53e-05
chrX	80145590	80146466	876	chrX:80145590-80146466	1.12659	0.136477	0.990114	0.505742	0.35528	9.88933	1.2e-15
chrX	80263179	80264535	1356	chrX:80263179-80264535	0.383788	-0.615095	0.998883	0.47817	0.209995	11.8041	8.91e-22
chrX	80344029	80344292	263	chrX:80344029-80344292	0.303879	-0.171515	0.475394	0.507193	0.157762	2.63429	0.0138416
chrX	81284514	81284716	202	chrX:81284514-81284716	0.851591	0.593863	0.257727	0.239642	0.13462	1.78968	0.0890008
chrX	82643153	82643352	199	chrX:82643153-82643352	-0.0752121	-0.29505	0.219838	0.426017	0.444692	1.27558	0.212311
chrX	82648864	82651144	2280	chrX:82648864-82651144	0.749545	-0.219756	0.969301	0.406111	0.365271	12.7383	2.1e-28
chrX	82651930	82653228	1298	chrX:82651930-82653228	0.798077	-0.119324	0.917401	0.565624	0.442769	10.2637	1.19e-18
chrX	82653846	82654085	239	chrX:82653846-82654085	0.471212	0.282222	0.18899	0.205587	0.282634	1.96762	0.0605856
chrX	82891381	82891838	457	chrX:82891381-82891838	1.23996	0.427879	0.812085	0.516811	0.222624	6.82486	1.15e-08
chrX	83328714	83330297	1583	chrX:83328714-83330297	0.887687	-0.152443	1.04013	0.466122	0.331448	12.4556	1.01e-25
chrX	83643493	83644259	766	chrX:83643493-83644259	0.810648	-0.41429	1.22494	0.38086	0.225291	11.1028	4.54e-18
chrX	84075588	84076485	897	chrX:84075588-84076485	1.26485	0.296785	0.968064	0.551137	0.714221	8.5334	1.95e-13
chrX	84145327	84145900	573	chrX:84145327-84145900	0.779939	-0.532588	1.31253	0.384633	0.36735	13.7396	1.25e-20
chrX	84385281	84386761	1480	chrX:84385281-84386761	0.788327	-0.30049	1.08882	0.530752	0.190419	12.6309	7.82e-26
chrX	85188790	85189333	543	chrX:85188790-85189333	0.0384394	-0.640581	0.67902	0.647386	0.422373	3.78008	0.000351706
chrX	85226159	85226889	730	chrX:85226159-85226889	1.77349	1.66392	0.109568	0.4948	0.277301	1.09096	0.278345
chrX	85227848	85228079	231	chrX:85227848-85228079	1.25503	1.47876	-0.223732	0.309834	0.142954	-1.72899	0.0948549
chrX	85289365	85290759	1394	chrX:85289365-85290759	0.999364	-0.221894	1.22126	0.38657	0.350981	18.0812	1.35e-39
chrX	88123868	88124211	343	chrX:88123868-88124211	0.952582	-0.0334849	0.986067	0.491129	0.202259	9.24197	4.83e-12
chrX	89063606	89064224	618	chrX:89063606-89064224	0.450009	2.27283	-1.82282	0.441398	0.326599	-17.9727	1.05e-28
chrX	89182510	89182853	343	chrX:89182510-89182853	0.781591	-0.0653029	0.846894	0.548214	0.198566	4.5052	0.00031055
chrX	89254038	89254458	420	chrX:89254038-89254458	1.59807	0.319091	1.27898	0.62135	0.530781	7.7482	1.31e-09
chrX	90576205	90577847	1642	chrX:90576205-90577847	0.913773	0.575549	0.338223	0.355279	0.502781	4.67869	5.8e-06
chrX	90920083	90924471	4388	chrX:90920083-90924471	-0.052368	-0.292706	0.240338	0.48094	0.459831	3.33308	0.000939658
chrX	90977176	90977375	199	chrX:90977176-90977375	1.42918	0.869545	0.559636	0.42935	0.421536	3.17827	0.00472762
chrX	91020760	91020959	199	chrX:91020760-91020959	1.27618	0.764545	0.511636	0.296364	0.386008	2.81304	0.0107757
chrX	91255130	91255338	208	chrX:91255130-91255338	1.48655	1.58361	-0.0970657	0.435359	0.266019	-0.538271	0.594969
chrX	91513973	91514240	267	chrX:91513973-91514240	0.901879	0.164748	0.737131	0.371735	0.629197	4.37205	0.000181015
chrX	91601223	91601908	685	chrX:91601223-91601908	1.425	0.587487	0.837513	0.469348	0.426397	6.25044	4.84e-08
chrX	91656929	91657308	379	chrX:91656929-91657308	1.4935	1.08606	0.40744	0.436677	0.341234	2.66252	0.0109466
chrX	92815157	92815528	371	chrX:92815157-92815528	-0.687291	-0.840333	0.153042	0.730408	0.512059	0.744976	0.459802
chrX	93634431	93634634	203	chrX:93634431-93634634	0.630788	0.616944	0.0138434	0.307431	0.602443	0.0800093	0.936805
chrX	94641042	94641339	297	chrX:94641042-94641339	0.948545	0.715353	0.233192	0.448794	0.125434	1.65654	0.108727
chrX	95826153	95827326	1173	chrX:95826153-95827326	0.283653	0.0515702	0.232083	0.414041	0.240644	2.33123	0.0217186
chrX	96025705	96026779	1074	chrX:96025705-96026779	1.64674	1.63873	0.00801094	0.428938	0.0755876	0.1022	0.918783
chrX	96983142	96983896	754	chrX:96983142-96983896	1.40877	1.336	0.072769	0.375097	0.210881	0.548935	0.584523
chrX	96988545	96991100	2555	chrX:96988545-96991100	1.43478	1.57453	-0.139756	0.461009	0.283674	-1.91498	0.0564997
chrX	99029545	99030010	465	chrX:99029545-99030010	1.10226	0.393119	0.709139	0.470855	0.512469	4.63897	1.79e-05
chrX	99079936	99080135	199	chrX:99079936-99080135	-0.15947	0.972803	-1.13227	0.437921	0.423638	-8.9915	1.26e-09
chrX	99080879	99081907	1028	chrX:99080879-99081907	1.16684	2.13913	-0.97229	0.422246	0.395689	-6.22875	1.27e-06
chrX	99438181	99438556	375	chrX:99438181-99438556	1.45486	1.24687	0.207989	0.383376	0.326074	1.7391	0.0895203
chrX	99548123	99553980	5857	chrX:99548123-99553980	1.17014	0.0489485	1.1212	0.437374	0.273721	21.662	2.81e-78
chrX	99741180	99741415	235	chrX:99741180-99741415	0.910739	1.46292	-0.552178	0.407363	0.38894	-3.71606	0.0012422
chrX	99777815	99778610	795	chrX:99777815-99778610	0.855556	-0.221886	1.07744	0.489623	0.260146	10.3268	3.79e-17
chrX	99803823	99804120	297	chrX:99803823-99804120	1.38909	1.29761	0.0914772	0.347174	0.372779	0.864251	0.392386
chrX	99812458	99812660	202	chrX:99812458-99812660	1.76777	1.56581	0.201957	0.28704	0.632384	1.37053	0.187817
chrX	99872947	99873879	932	chrX:99872947-99873879	1.00171	0.103273	0.898441	0.497032	0.700383	8.27918	4.66e-13
chrX	99961169	99962445	1276	chrX:99961169-99962445	0.959475	0.14743	0.812045	0.407264	0.25446	8.20569	2.88e-13
chrX	99972415	99972648	233	chrX:99972415-99972648	1.30491	0.842197	0.462712	0.375545	0.53505	2.51842	0.0224356
chrX	99974763	99975034	271	chrX:99974763-99975034	0.832182	0.556818	0.275364	0.275729	0.329128	2.05543	0.0468763
chrX	99983278	99983477	199	chrX:99983278-99983477	1.04182	0.686288	0.35553	0.269602	0.542745	1.91128	0.0763246
chrX	100030017	100030275	258	chrX:100030017-100030275	1.04258	1.2549	-0.212323	0.262556	0.493154	-1.54277	0.134836
chrX	100070168	100071104	936	chrX:100070168-100071104	1.27523	-0.103367	1.3786	0.408966	0.555145	13.3669	1.63e-22
chrX	100115006	100115227	221	chrX:100115006-100115227	1.24373	-0.0739393	1.31767	0.641098	0.270384	4.06029	0.00076456
chrX	100193156	100193929	773	chrX:100193156-100193929	0.95197	-0.186498	1.13847	0.454004	0.519005	11.9118	1.26e-20
chrX	100220366	100220578	212	chrX:100220366-100220578	0.164636	0.361364	-0.196727	0.383456	0.590788	-1.02133	0.321711
chrX	100239270	100240124	854	chrX:100239270-100240124	1.07681	-0.302424	1.37923	0.514333	0.618689	11.9174	2.14e-19
chrX	100332748	100333475	727	chrX:100332748-100333475	1.19579	0.102403	1.09339	0.566464	0.591547	8.56751	9.99e-13
chrX	100383271	100383475	204	chrX:100383271-100383475	0.796576	0.64399	0.152586	0.342828	0.565226	0.993428	0.328653
chrX	100432549	100433147	598	chrX:100432549-100433147	1.02251	0.0464177	0.976089	0.455062	0.427377	10.4792	2.45e-16
chrX	100434097	100434740	643	chrX:100434097-100434740	1.4744	1.12894	0.345463	0.378156	0.382822	2.44773	0.0170796
chrX	100489935	100490866	931	chrX:100489935-100490866	1.12541	-0.599924	1.72534	0.40524	0.29227	15.7105	5.14e-28
chrX	100532250	100532952	702	chrX:100532250-100532952	0.947579	-0.473608	1.42119	0.365317	0.194871	15.1953	5.55e-26
chrX	100548700	100550330	1630	chrX:100548700-100550330	0.759979	-0.316052	1.07603	0.375593	0.305638	14.2641	2.18e-31
chrX	100559667	100560489	822	chrX:100559667-100560489	0.964386	0.0450189	0.919367	0.411574	0.286451	10.015	6.24e-16
chrX	100626794	100627754	960	chrX:100626794-100627754	1.26931	0.156849	1.11246	0.417776	0.268269	11.6979	6.5e-21
chrX	100680803	100681208	405	chrX:100680803-100681208	1.26282	0.0275378	1.23528	0.694233	0.43671	6.00264	4.7e-07
chrX	100692098	100694875	2777	chrX:100692098-100694875	1.36744	0.944267	0.423168	0.503236	0.440151	5.04119	8.15e-07
chrX	100739565	100739768	203	chrX:100739565-100739768	1.21939	2.16028	-0.940884	0.183435	0.674607	-9.65737	3.26e-10
chrX	100740337	100740895	558	chrX:100740337-100740895	1.6915	1.47056	0.220945	0.451024	0.244679	1.97511	0.052958
chrX	100741893	100742092	199	chrX:100741893-100742092	1.76218	1.17568	0.5865	0.383152	0.361965	3.09815	0.00665181
chrX	100754878	100755077	199	chrX:100754878-100755077	1.88909	1.3803	0.508788	0.470382	0.300804	2.5203	0.0207596
chrX	100756181	100756575	394	chrX:100756181-100756575	1.96941	1.82936	0.140053	0.511814	0.513109	0.906463	0.369901
chrX	100757311	100757513	202	chrX:100757311-100757513	1.32318	2.33087	-1.00769	0.256554	0.566327	-5.81457	4.71e-06
chrX	100759161	100759745	584	chrX:100759161-100759745	1.1346	-0.275292	1.40989	0.381753	0.150356	11.0774	3.91e-17
chrX	100764597	100765935	1338	chrX:100764597-100765935	1.01273	0.292803	0.719924	0.3491	0.524881	7.61851	2.77e-12
chrX	100800233	100801657	1424	chrX:100800233-100801657	0.994699	0.183811	0.810888	0.512829	0.520457	7.69468	2.27e-12
chrX	100920650	100920871	221	chrX:100920650-100920871	1.49442	1.57066	-0.0762324	0.444348	0.422644	-0.51011	0.613634
chrX	100922006	100922413	407	chrX:100922006-100922413	1.4658	0.325424	1.14038	0.599979	0.452268	8.45585	4.11e-11
chrX	101073091	101074007	916	chrX:101073091-101074007	1.04345	0.0871104	0.956344	0.422541	0.372105	8.53086	1.63e-12
chrX	101267007	101267891	884	chrX:101267007-101267891	1.31997	0.0138384	1.30613	0.421836	0.732342	12.7952	2.7e-21
chrX	101282483	101282682	199	chrX:101282483-101282682	1.39564	1.44966	-0.0540227	0.431254	0.469568	-0.273612	0.787522
chrX	101283410	101284300	890	chrX:101283410-101284300	1.317	0.276869	1.04013	0.530623	0.441363	9.67951	7.18e-16
chrX	101296782	101297903	1121	chrX:101296782-101297903	1.0278	-0.322314	1.35012	0.503465	0.648365	13.1486	1.33e-24
chrX	101356891	101357114	223	chrX:101356891-101357114	1.0063	1.12707	-0.120768	0.324869	0.469075	-0.817212	0.420186
chrX	101447085	101447448	363	chrX:101447085-101447448	1.78612	0.589394	1.19673	0.542984	0.169477	8.21606	2.42e-08
chrX	101502032	101502261	229	chrX:101502032-101502261	0.275915	1.59333	-1.31742	0.370417	0.50814	-11.7413	9.98e-13
chrX	101522872	101523235	363	chrX:101522872-101523235	1.72764	0.55	1.17764	0.590669	0.38282	6.09464	3.56e-07
chrX	101613220	101613443	223	chrX:101613220-101613443	1.06042	1.12485	-0.0644243	0.326549	0.246441	-0.442352	0.661945
chrX	101657509	101658568	1059	chrX:101657509-101658568	1.05089	-0.116977	1.16787	0.505072	0.429751	11.2556	2.08e-20
chrX	101688281	101689041	760	chrX:101688281-101689041	1.39533	0.811581	0.583748	0.438503	0.483932	5.88031	7.69e-08
chrX	101689761	101690196	435	chrX:101689761-101690196	1.38333	0.467758	0.91557	0.610655	0.429942	4.9311	1.24e-05
chrX	101740835	101741642	807	chrX:101740835-101741642	0.971566	-0.294486	1.26605	0.435248	0.688827	11.1753	1.19e-18
chrX	101792572	101793708	1136	chrX:101792572-101793708	1.30785	0.271412	1.03644	0.47678	0.584627	10.9376	1.36e-19
chrX	101801537	101801872	335	chrX:101801537-101801872	0.576068	-0.221742	0.797811	0.205372	0.773746	5.58519	5.43e-06
chrX	101853573	101854887	1314	chrX:101853573-101854887	1.14244	0.144732	0.997709	0.474055	0.645777	11.1826	5e-21
chrX	101862189	101862711	522	chrX:101862189-101862711	0.960879	0.196692	0.764187	0.380025	0.521401	5.73588	2.86e-07
chrX	101887221	101888390	1169	chrX:101887221-101888390	1.09418	0.269508	0.824674	0.438126	0.511336	8.9469	3.24e-15
chrX	101910586	101910946	360	chrX:101910586-101910946	0.504386	-0.139432	0.643818	0.556245	0.279888	4.00903	0.000245557
chrX	102078707	102079359	652	chrX:102078707-102079359	1.64458	0.473885	1.1707	0.618081	0.547933	8.25169	4.52e-12
chrX	102120179	102120384	205	chrX:102120179-102120384	1.07818	1.00189	0.0762879	0.207993	0.156942	0.574205	0.573601
chrX	102204841	102206063	1222	chrX:102204841-102206063	1.23285	-0.122809	1.35565	0.425377	0.168634	13.4244	5.84e-27
chrX	102317847	102318049	202	chrX:102317847-102318049	0.708667	0.403283	0.305384	0.229304	0.213202	1.61474	0.116515
chrX	102356488	102358019	1531	chrX:102356488-102358019	1.31203	0.308987	1.00305	0.394474	0.337257	11.2469	2.23e-22
chrX	102396220	102396971	751	chrX:102396220-102396971	0.520318	-0.367064	0.887383	0.562236	0.582569	6.4472	6.68e-09
chrX	102415646	102415845	199	chrX:102415646-102415845	-0.0843371	1.55275	-1.63709	0.414077	0.339745	-10.6937	8.84e-10
chrX	102417631	102418561	930	chrX:102417631-102418561	0.985691	0.296015	0.689676	0.371103	0.245872	7.64722	9.17e-12
chrX	102451849	102452765	916	chrX:102451849-102452765	1.08893	0.263703	0.825229	0.525659	0.447921	8.03584	4.56e-12
chrX	102472153	102472512	359	chrX:102472153-102472512	1.0212	1.28813	-0.266921	0.466813	0.64784	-1.62442	0.113167
chrX	102489390	102490428	1038	chrX:102489390-102490428	1.35217	0.422548	0.929625	0.614174	0.315703	8.98429	6.05e-15
chrX	102497914	102498655	741	chrX:102497914-102498655	0.748636	-0.205199	0.953835	0.444348	0.180766	8.44516	9.39e-13
chrX	102517869	102519034	1165	chrX:102517869-102519034	1.29912	0.0256993	1.27342	0.348391	0.383207	16.0219	4.38e-32
chrX	102546178	102546574	396	chrX:102546178-102546574	0.180182	-0.265076	0.445258	0.408753	0.566345	2.68378	0.0110493
chrX	102641906	102642546	640	chrX:102641906-102642546	1.63349	0.547045	1.08645	0.776407	0.329546	7.31744	4.93e-10
chrX	102675325	102675546	221	chrX:102675325-102675546	0.141455	-0.353586	0.495041	0.204648	0.447557	2.427	0.0219998
chrX	102696369	102696717	348	chrX:102696369-102696717	-0.565212	-0.725126	0.159914	0.631676	0.64433	0.712528	0.481695
chrX	102726899	102727953	1054	chrX:102726899-102727953	0.995364	0.0679063	0.927457	0.445945	0.60762	9.16745	2.34e-15
chrX	102749252	102750241	989	chrX:102749252-102750241	1.0475	0.0603237	0.98718	0.508876	0.420445	9.99641	1.89e-17
chrX	102750809	102751138	329	chrX:102750809-102751138	1.38868	1.60417	-0.215485	0.231718	0.430307	-1.86826	0.0690568
chrX	102770301	102771728	1427	chrX:102770301-102771728	0.878776	0.0162324	0.862543	0.427952	0.514025	10.832	1.25e-20
chrX	102805768	102806036	268	chrX:102805768-102806036	0.889621	1.21538	-0.325758	0.367459	0.224077	-1.9731	0.063967
chrX	102828138	102829638	1500	chrX:102828138-102829638	0.466977	-0.71758	1.18456	0.53711	0.848599	12.213	5.19e-25
chrX	102855020	102855285	265	chrX:102855020-102855285	0.0392046	1.87316	-1.83395	0.377291	0.47576	-9.14141	6.13e-10
chrX	102973248	102974113	865	chrX:102973248-102974113	0.896263	0.106077	0.790185	0.448352	0.892237	6.30806	1.1e-08
chrX	103045979	103046198	219	chrX:103045979-103046198	1.44395	0.595227	0.848727	0.387393	0.230781	5.90546	9.13e-06
chrX	103059469	103060705	1236	chrX:103059469-103060705	0.846773	-0.0898106	0.936583	0.441555	0.663684	10.9761	3.09e-20
chrX	103103418	103104626	1208	chrX:103103418-103104626	1.1429	0.16426	0.978635	0.46834	0.40152	9.66023	6.43e-17
chrX	103117182	103117638	456	chrX:103117182-103117638	2.00278	1.29655	0.706236	0.303019	0.334544	6.84973	1.5e-08
chrX	103124855	103125159	304	chrX:103124855-103125159	1.65741	1.30706	0.350345	0.369838	0.463066	2.60442	0.0126815
chrX	103126787	103126986	199	chrX:103126787-103126986	0.00918186	1.89439	-1.88521	0.435527	0.475238	-11.9148	6.72e-09
chrX	103148448	103148705	257	chrX:103148448-103148705	1.376	1.48439	-0.108394	0.31585	0.237725	-0.911261	0.369248
chrX	103154338	103155197	859	chrX:103154338-103155197	1.62027	0.498771	1.1215	0.50508	0.37297	8.8247	4.65e-14
chrX	103180943	103181954	1011	chrX:103180943-103181954	1.64755	0.760985	0.88657	0.445446	0.734246	7.56456	1.46e-11
chrX	103188580	103188786	206	chrX:103188580-103188786	1.63882	1.09326	0.54556	0.393972	0.584269	2.35362	0.031222
chrX	103194300	103194499	199	chrX:103194300-103194499	0.2037	2.09386	-1.89016	0.394026	0.54878	-15.0141	5.76e-11
chrX	103196167	103196471	304	chrX:103196167-103196471	1.59268	1.63375	-0.0410683	0.409087	0.761643	-0.305954	0.761309
chrX	103203688	103204144	456	chrX:103203688-103204144	2.10289	1.45894	0.643951	0.361021	0.492223	4.6283	3.26e-05
chrX	103243502	103245009	1507	chrX:103243502-103245009	0.995347	0.0778173	0.917529	0.517738	0.356631	10.8932	2.93e-21
chrX	103287872	103288545	673	chrX:103287872-103288545	0.725068	0.0841383	0.64093	0.363522	0.214823	5.51254	4.02e-07
chrX	103297569	103298493	924	chrX:103297569-103298493	1.03277	0.085697	0.947076	0.478214	0.324219	9.275	2.19e-15
chrX	103381582	103382015	433	chrX:103381582-103382015	1.0545	0.183712	0.870788	0.486018	0.348825	6.72403	3.63e-08
chrX	103384777	103387486	2709	chrX:103384777-103387486	1.11424	-0.366765	1.48101	0.393764	0.908838	24.1289	4.41e-71
chrX	103441582	103441839	257	chrX:103441582-103441839	1.2877	0.703636	0.584061	0.37119	0.165601	5.03692	2.01e-05
chrX	103696185	103699144	2959	chrX:103696185-103699144	0.963554	-0.110407	1.07396	0.472372	0.324978	17.7443	8.23e-50
chrX	103699745	103700047	302	chrX:103699745-103700047	1.04434	-0.964962	2.0093	0.509807	0.47949	13.3124	1.33e-16
chrX	104350147	104350426	279	chrX:104350147-104350426	0.618068	1.55445	-0.936383	0.861628	0.793605	-3.83598	0.000379719
chrX	104351566	104351769	203	chrX:104351566-104351769	1.94424	1.41985	0.524394	0.481439	0.242454	3.18402	0.00333178
chrX	104536787	104536986	199	chrX:104536787-104536986	0.579955	0.499545	0.0804091	0.348657	0.0822981	0.596781	0.557358
chrX	104951999	104954081	2082	chrX:104951999-104954081	1.29713	-0.0760967	1.37323	0.503477	0.575049	15.2765	9.98e-37
chrX	105298843	105299102	259	chrX:105298843-105299102	0.496939	-0.224091	0.72103	0.282043	0.546233	4.46538	0.000100684
chrX	105307768	105307967	199	chrX:105307768-105307967	0.423273	-0.0964393	0.519712	0.483112	0.213566	2.79477	0.0125774
chrX	105531928	105532133	205	chrX:105531928-105532133	1.00236	0.771136	0.231227	0.226703	0.373825	1.60676	0.131907
chrX	105741536	105742095	559	chrX:105741536-105742095	1.01018	-0.420934	1.43112	0.322117	0.229351	16.1517	2.37e-23
chrX	105856339	105857320	981	chrX:105856339-105857320	0.975482	-0.0739393	1.04942	0.46517	0.216978	10.4227	5.24e-18
chrX	105932634	105933385	751	chrX:105932634-105933385	0.862477	0.0500474	0.81243	0.415435	0.412734	8.28284	1.44e-12
chrX	106128843	106130420	1577	chrX:106128843-106130420	0.932642	0.00727751	0.925365	0.505199	0.299423	11.8488	4e-24
chrX	106248035	106248759	724	chrX:106248035-106248759	0.841273	-0.745691	1.58696	0.334709	0.283592	16.4992	1.65e-27
chrX	106261421	106261644	223	chrX:106261421-106261644	0.645758	0.164242	0.481515	0.3122	0.436812	3.87593	0.000597128
chrX	106335539	106336714	1175	chrX:106335539-106336714	0.928909	0.0388345	0.890075	0.340789	0.67604	8.9989	2.54e-15
chrX	106402317	106403580	1263	chrX:106402317-106403580	1.3072	0.635291	0.671911	0.329094	0.147969	7.02966	8.19e-11
chrX	106454015	106454301	286	chrX:106454015-106454301	1.24164	0.394242	0.847394	0.650293	0.276322	4.67624	6.09e-05
chrX	106578810	106580544	1734	chrX:106578810-106580544	1.12617	0.108886	1.01729	0.486103	0.54959	13.4297	4.56e-29
chrX	106581666	106581921	255	chrX:106581666-106581921	0.673455	0.486818	0.186637	0.386371	0.187787	0.927647	0.366625
chrX	106636438	106637705	1267	chrX:106636438-106637705	1.11105	0.0606527	1.0504	0.439831	0.419482	13.2891	1.85e-26
chrX	106651904	106652103	199	chrX:106651904-106652103	1.91871	1.60061	0.318106	0.353234	0.60958	2.22004	0.0350166
chrX	106690112	106690363	251	chrX:106690112-106690363	1.43236	1.51091	-0.0785455	0.245295	0.308224	-0.654099	0.519414
chrX	106731930	106732170	240	chrX:106731930-106732170	1.15773	0.275505	0.882222	0.576715	0.47048	4.27574	0.000170792
chrX	106732908	106733108	200	chrX:106732908-106733108	1.518	0.324318	1.19368	0.53778	0.423451	6.01281	7.28e-06
chrX	106758067	106759021	954	chrX:106758067-106759021	0.999306	-0.355	1.35431	0.350957	0.49629	13.8367	1.8e-26
chrX	106806574	106807134	560	chrX:106806574-106807134	1.09089	0.156566	0.934328	0.4802	0.2907	8.04928	2.64e-11
chrX	106837892	106838093	201	chrX:106837892-106838093	1.069	1.00542	0.0635834	0.459454	0.380785	0.337607	0.739185
chrX	106845895	106847066	1171	chrX:106845895-106847066	0.949967	0.0315977	0.918369	0.489204	0.508787	10.1748	7.42e-18
chrX	106872615	106872818	203	chrX:106872615-106872818	1.34264	0.195076	1.14756	0.338653	0.482984	6.3338	3.71e-06
chrX	106903555	106903770	215	chrX:106903555-106903770	1.286	1.14424	0.141757	0.536076	0.284312	0.8579	0.400126
chrX	106904914	106906608	1694	chrX:106904914-106906608	1.05759	0.0740196	0.983574	0.512715	0.223111	12.256	1.15e-25
chrX	106907127	106907346	219	chrX:106907127-106907346	-0.0640607	-0.409141	0.345081	0.351082	0.327315	2.29354	0.0288297
chrX	106955589	106956988	1399	chrX:106955589-106956988	0.938877	0.101623	0.837253	0.439637	0.863399	9.616	3.62e-17
chrX	107065721	107066336	615	chrX:107065721-107066336	1.30418	0.457013	0.847169	0.614987	0.62097	5.37908	8.19e-07
chrX	107111824	107112023	199	chrX:107111824-107112023	2.17845	1.66189	0.51656	0.285675	0.387107	2.87115	0.00947505
chrX	107220973	107221953	980	chrX:107220973-107221953	1.00945	-0.400697	1.41014	0.444405	0.409425	12.9861	2.12e-23
chrX	107567756	107568292	536	chrX:107567756-107568292	0.548394	0.0894444	0.45895	0.369307	0.621538	3.4013	0.00135456
chrX	107569465	107570169	704	chrX:107569465-107570169	-0.0447727	-0.57846	0.533687	0.288655	1.19535	3.63596	0.000819183
chrX	107862408	107863018	610	chrX:107862408-107863018	0.414312	-0.447792	0.862104	0.419421	0.312211	7.44494	1.35e-10
chrX	107864841	107867446	2605	chrX:107864841-107867446	1.00515	-0.0947552	1.0999	0.476709	0.429049	16.6251	9.21e-44
chrX	108184011	108184539	528	chrX:108184011-108184539	0.386146	-0.097606	0.483752	1.14283	0.615538	1.73754	0.0881049
chrX	108605033	108605611	578	chrX:108605033-108605611	0.586636	0.0510714	0.535565	0.282013	0.282042	6.04204	1.03e-07
chrX	108666640	108667238	598	chrX:108666640-108667238	0.822519	-0.189058	1.01158	0.461684	0.0817602	9.79368	1.46e-14
chrX	108730062	108730343	281	chrX:108730062-108730343	1.04758	0.292298	0.755278	0.389587	0.186413	5.76497	2.43e-06
chrX	108754357	108755249	892	chrX:108754357-108755249	1.25216	0.224606	1.02756	0.56552	0.437082	10.1581	2.25e-17
chrX	108862359	108863659	1300	chrX:108862359-108863659	0.954357	-0.161851	1.11621	0.37872	0.367647	14.8924	2.01e-31
chrX	109131978	109133498	1520	chrX:109131978-109133498	1.13716	0.229268	0.907896	0.531118	0.816622	9.88611	3.12e-18
chrX	109302135	109302340	205	chrX:109302135-109302340	1.06261	1.16912	-0.10651	0.46922	0.515763	-0.692414	0.493864
chrX	109447214	109448426	1212	chrX:109447214-109448426	1.09471	-0.142518	1.23723	0.572567	0.295031	12.7935	3.89e-25
chrX	109476616	109476974	358	chrX:109476616-109476974	1.08291	-0.0957576	1.17867	0.697028	0.193328	6.78702	7.58e-08
chrX	109650628	109650943	315	chrX:109650628-109650943	1.04662	1.62345	-0.576831	0.377391	0.345191	-3.68264	0.000933385
chrX	109921215	109921424	209	chrX:109921215-109921424	0.868364	0.437424	0.430939	0.314905	0.167398	2.51287	0.0234946
chrX	109925497	109926226	729	chrX:109925497-109926226	1.2804	-0.00053025	1.28093	0.480504	0.725163	9.33466	1.57e-14
chrX	110074024	110075134	1110	chrX:110074024-110075134	1.01504	0.264646	0.750394	0.546429	0.657993	7.12276	1.88e-10
chrX	110225921	110226846	925	chrX:110225921-110226846	1.09352	0.107288	0.98623	0.408971	0.36473	8.67959	1.22e-13
chrX	110228624	110229120	496	chrX:110228624-110229120	0.418273	0.00919194	0.409081	0.274715	0.592115	3.24501	0.00197933
chrX	110539857	110540299	442	chrX:110539857-110540299	0.559794	1.67059	-1.1108	0.37159	0.430135	-7.03123	1.11e-08
chrX	110750042	110751312	1270	chrX:110750042-110751312	1.64215	2.22229	-0.580145	0.279471	0.119333	-5.80984	1.82e-06
chrX	110754016	110754586	570	chrX:110754016-110754586	1.71255	1.09991	0.61264	0.527941	0.473424	4.17967	0.000147144
chrX	110810951	110812000	1049	chrX:110810951-110812000	0.595145	-0.243826	0.838971	0.42366	0.281425	7.92189	4.12e-12
chrX	111042467	111042695	228	chrX:111042467-111042695	1.84098	2.02451	-0.183523	0.584089	0.561398	-0.756579	0.457432
chrX	111211632	111212062	430	chrX:111211632-111212062	0.939364	0.327939	0.611424	0.523053	1.0218	3.17926	0.00263304
chrX	111212759	111213429	670	chrX:111212759-111213429	1.45348	0.432753	1.02073	0.438914	0.92307	5.96685	1.16e-07
chrX	111510460	111511226	766	chrX:111510460-111511226	0.65725	0.643447	0.013803	0.574316	0.510158	0.0893905	0.929016
chrX	111909415	111909622	207	chrX:111909415-111909622	0.937212	0.465051	0.472162	0.198643	0.268969	3.2377	0.00358619
chrX	111931074	111931282	208	chrX:111931074-111931282	1.81354	2.03451	-0.220972	0.792931	0.443436	-0.959482	0.355622
chrX	111970067	111971652	1585	chrX:111970067-111971652	0.803511	-0.20438	1.00789	0.482024	0.560048	11.1187	5.26e-22
chrX	113531050	113531565	515	chrX:113531050-113531565	1.57542	1.15318	0.422236	0.420829	0.188776	3.34497	0.00152933
chrX	113722181	113723939	1758	chrX:113722181-113723939	0.123697	-0.303594	0.427291	0.401111	0.430914	5.70083	4.5e-08
chrX	113724651	113726045	1394	chrX:113724651-113726045	0.579133	-0.026697	0.60583	0.473631	0.448939	6.627	5.44e-10
chrX	114047438	114047809	371	chrX:114047438-114047809	1.18936	1.22602	-0.036659	1.28737	0.395126	-0.120157	0.905179
chrX	114209716	114210194	478	chrX:114209716-114210194	1.56044	0.311515	1.24892	0.639146	0.603012	7.99339	1.15e-10
chrX	114330127	114333492	3365	chrX:114330127-114333492	1.70302	0.237326	1.4657	0.601685	0.295833	22.9597	1.84e-72
chrX	114374225	114375146	921	chrX:114374225-114375146	0.36701	-0.497433	0.864443	0.578839	0.355117	5.9341	5.03e-08
chrX	114430411	114430843	432	chrX:114430411-114430843	1.41636	1.00674	0.409621	0.39104	0.247322	2.77074	0.00775802
chrX	114452566	114452963	397	chrX:114452566-114452963	0.746205	0.22072	0.525485	0.499223	0.265888	3.84892	0.000398859
chrX	114489137	114489374	237	chrX:114489137-114489374	0.979909	-0.508864	1.48877	0.380735	0.361193	9.39862	1.22e-08
chrX	114701621	114703089	1468	chrX:114701621-114703089	0.203121	-0.1065	0.309621	0.435823	0.574837	2.8185	0.0055665
chrX	114859688	114860063	375	chrX:114859688-114860063	0.971091	0.768409	0.202682	0.817659	0.435733	0.687842	0.501007
chrX	114863495	114864088	593	chrX:114863495-114864088	0.227182	-0.174343	0.401525	0.36905	0.4652	2.58867	0.0132603
chrX	114907153	114920511	13358	chrX:114907153-114920511	1.79115	1.07623	0.714916	0.713345	0.672699	4.61095	1.32e-05
chrX	114981279	114981486	207	chrX:114981279-114981486	0.327939	1.81008	-1.48214	0.635385	0.861212	-6.83924	1.16e-06
chrX	114998663	114999747	1084	chrX:114998663-114999747	0.848818	-0.227459	1.07628	0.453894	0.716282	10.56	1.88e-18
chrX	115153572	115153799	227	chrX:115153572-115153799	1.57545	1.45614	0.119318	0.396508	0.629858	0.503866	0.620316
chrX	115508041	115508430	389	chrX:115508041-115508430	1.16727	1.36164	-0.194364	0.394727	0.350941	-1.26351	0.211937
chrX	115712093	115712475	382	chrX:115712093-115712475	1.29293	1.33839	-0.0454585	0.411772	0.433106	-0.335641	0.738851
chrX	117134106	117135248	1142	chrX:117134106-117135248	1.21848	0.156433	1.06204	0.560177	0.452651	10.8071	8.1e-20
chrX	117146671	117147058	387	chrX:117146671-117147058	1.62852	1.00559	0.622936	0.425994	0.37843	4.38948	7.69e-05
chrX	117363427	117365002	1575	chrX:117363427-117365002	1.03771	-0.0846923	1.1224	0.396283	0.157252	16.7323	4.92e-38
chrX	117513143	117514868	1725	chrX:117513143-117514868	1.17835	0.0276937	1.15065	0.445915	0.388045	16.2312	1.03e-37
chrX	117517233	117517598	365	chrX:117517233-117517598	0.894023	0.802197	0.0918258	0.574763	0.299039	0.588314	0.559879
chrX	117652222	117652561	339	chrX:117652222-117652561	1.73927	1.38047	0.358799	0.375422	0.292264	3.16612	0.00321644
chrX	117745133	117746398	1265	chrX:117745133-117746398	1.15466	0.098986	1.05568	0.42825	0.387874	11.9171	5.71e-23
chrX	117787976	117788758	782	chrX:117787976-117788758	1.66512	0.450114	1.21501	0.550633	0.583852	9.51812	6.54e-15
chrX	117841458	117844066	2608	chrX:117841458-117844066	0.913304	-0.124219	1.03752	0.337123	0.269566	20.08	4.14e-56
chrX	117857195	117857839	644	chrX:117857195-117857839	1.00883	0.00456717	1.00426	0.436703	0.377962	9.33714	3.93e-14
chrX	117896956	117897376	420	chrX:117896956-117897376	1.41976	0.0272271	1.39254	0.591855	0.386279	10.7796	1.16e-14
chrX	117991396	117994646	3250	chrX:117991396-117994646	1.04145	-0.108131	1.14958	0.451779	0.722542	19.5956	3.39e-57
chrX	118091261	118092161	900	chrX:118091261-118092161	1.41558	0.203687	1.21189	0.706534	0.578753	9.51452	1.52e-15
chrX	118168421	118169012	591	chrX:118168421-118169012	1.76405	0.138485	1.62556	0.634945	0.215281	9.64138	4.45e-14
chrX	118238716	118238916	200	chrX:118238716-118238916	0.730909	0.787386	-0.0564773	0.568409	0.20141	-0.290249	0.775324
chrX	118240827	118241380	553	chrX:118240827-118241380	1.33294	0.0299874	1.30295	0.564268	0.473683	9.56252	5.97e-14
chrX	118253551	118255302	1751	chrX:118253551-118255302	1.25497	0.225406	1.02956	0.732359	1.1559	9.73518	2.51e-18
chrX	118290515	118292383	1868	chrX:118290515-118292383	1.38448	0.208493	1.17599	0.527161	0.540949	12.3278	1.71e-26
chrX	118417043	118417932	889	chrX:118417043-118417932	1.06552	-0.0291591	1.09468	0.545259	0.56219	9.2964	2.1e-15
chrX	118486068	118488501	2433	chrX:118486068-118488501	1.27962	0.485976	0.793642	0.362359	0.478497	9.38815	2.92e-18
chrX	118492660	118492935	275	chrX:118492660-118492935	1.19805	1.00917	0.188879	0.50519	0.264478	1.28288	0.208353
chrX	118500426	118501072	646	chrX:118500426-118501072	1.04205	-0.0944048	1.13646	0.503048	0.430721	9.35326	3.2e-14
chrX	118583015	118583601	586	chrX:118583015-118583601	0.658394	-0.206919	0.865313	0.329719	0.270673	7.91295	4.83e-11
chrX	118591817	118593379	1562	chrX:118591817-118593379	1.08436	0.0868182	0.997539	0.464232	0.967794	11.8815	2.62e-23
chrX	118623246	118624731	1485	chrX:118623246-118624731	1.08737	-0.0648637	1.15223	0.500925	0.389119	12.9697	9.54e-27
chrX	118654994	118655285	291	chrX:118654994-118655285	1.1457	1.25763	-0.111929	0.291951	0.281914	-0.855367	0.400322
chrX	118666356	118666574	218	chrX:118666356-118666574	0.197091	-0.0369698	0.234061	0.318656	0.428844	1.04564	0.308956
chrX	118670871	118671100	229	chrX:118670871-118671100	1.88221	1.91871	-0.0364998	0.373137	0.226132	-0.264991	0.792771
chrX	118710105	118712335	2230	chrX:118710105-118712335	1.06321	0.0110641	1.05215	0.551867	0.358863	13.1557	4.2e-30
chrX	118712852	118713653	801	chrX:118712852-118713653	1.54057	1.15875	0.38182	0.475161	0.362135	3.60714	0.000496241
chrX	118775947	118778123	2176	chrX:118775947-118778123	1.29779	0.197339	1.10045	0.479975	0.638534	15.5843	1.75e-37
chrX	118793780	118793991	211	chrX:118793780-118793991	1.23391	0.822386	0.411523	0.345868	0.626646	2.03089	0.0561648
chrX	118808997	118810279	1282	chrX:118808997-118810279	0.842161	-0.282348	1.12451	0.433717	0.469991	14.3093	3.9e-29
chrX	118870560	118871387	827	chrX:118870560-118871387	1.10134	-0.0843371	1.18568	0.271015	0.181	13.184	8.62e-20
chrX	118888571	118890307	1736	chrX:118888571-118890307	1.02216	-0.345829	1.36798	0.384551	0.329882	20.5559	1.6e-49
chrX	118905752	118906326	574	chrX:118905752-118906326	1.26415	0.455606	0.808539	0.412704	0.501557	5.71496	5.55e-07
chrX	118960919	118961928	1009	chrX:118960919-118961928	0.892645	-0.465496	1.35814	0.342669	0.437831	14.9941	3.5e-29
chrX	119008355	119009802	1447	chrX:119008355-119009802	1.04085	-0.159939	1.20079	0.402991	0.27807	16.5137	3.85e-36
chrX	119017367	119019204	1837	chrX:119017367-119019204	1.04316	-0.156638	1.1998	0.376501	0.169161	15.6551	7.05e-35
chrX	119032703	119034280	1577	chrX:119032703-119034280	1.17887	0.0975059	1.08136	0.396986	0.516032	12.3767	3.57e-24
chrX	119094759	119095840	1081	chrX:119094759-119095840	1.68333	1.14233	0.541003	0.634602	0.521078	4.3659	2.78e-05
chrX	119133308	119133977	669	chrX:119133308-119133977	1.53968	0.402684	1.13699	0.572566	0.324614	8.91939	2.37e-13
chrX	119138301	119138971	670	chrX:119138301-119138971	1.51694	1.61162	-0.0946883	0.366224	0.308573	-0.831305	0.40872
chrX	119176400	119177519	1119	chrX:119176400-119177519	1.76783	1.07323	0.694593	0.552885	0.206795	6.17776	8.24e-09
chrX	119218839	119219038	199	chrX:119218839-119219038	1.5637	1.63455	-0.0708486	0.254345	0.527718	-0.516835	0.609377
chrX	119262336	119263342	1006	chrX:119262336-119263342	1.12807	-0.129869	1.25794	0.384555	0.350609	14.8623	7.44e-29
chrX	119268365	119269878	1513	chrX:119268365-119269878	0.989588	-0.622192	1.61178	0.583717	0.541146	14.312	1.3e-30
chrX	119326939	119329551	2612	chrX:119326939-119329551	0.96729	-0.304394	1.27168	0.494548	0.69113	18.8766	3.04e-52
chrX	119486572	119487419	847	chrX:119486572-119487419	1.00624	0.52661	0.479629	0.580087	0.336828	3.19761	0.00195829
chrX	119503631	119504360	729	chrX:119503631-119504360	0.623523	-0.171212	0.794735	0.440642	0.405488	8.13714	3.09e-12
chrX	119515992	119516191	199	chrX:119515992-119516191	0.806091	0.300833	0.505257	0.404448	0.625736	2.23461	0.0413781
chrX	119578513	119579373	860	chrX:119578513-119579373	0.911353	0.00329124	0.908062	0.56928	0.364335	8.54361	2.11e-13
chrX	119593310	119593513	203	chrX:119593310-119593513	0.440727	0.210758	0.22997	0.46933	0.225822	1.35927	0.193275
chrX	119621706	119622194	488	chrX:119621706-119622194	0.9564	-0.158242	1.11464	0.384644	0.247976	10.9658	3.69e-15
chrX	119647507	119648412	905	chrX:119647507-119648412	1.11781	-0.0306591	1.14847	0.403483	0.40998	11.7296	8.6e-21
chrX	119750703	119751283	580	chrX:119750703-119751283	1.61955	0.581338	1.03821	0.498807	0.232838	8.03466	1.11e-10
chrX	119887557	119887936	379	chrX:119887557-119887936	1.47924	1.35745	0.121782	0.370272	0.418304	1.01526	0.314758
chrX	119892628	119893785	1157	chrX:119892628-119893785	1.81431	0.276385	1.53793	0.836787	0.377691	9.22173	6.8e-14
chrX	119916763	119918113	1350	chrX:119916763-119918113	1.51309	0.0131059	1.49998	0.521981	0.187422	6.83044	3.14e-06
chrX	120008915	120009795	880	chrX:120008915-120009795	1.07288	0.154133	0.918746	0.497046	0.267215	6.65934	2.57e-09
chrX	122144952	122147177	2225	chrX:122144952-122147177	1.04484	0.244174	0.800669	0.525197	0.558959	11.4096	2.25e-24
chrX	122167795	122168012	217	chrX:122167795-122168012	0.640485	0.415859	0.224626	0.37824	0.406051	1.38964	0.174985
chrX	122475758	122476349	591	chrX:122475758-122476349	1.36591	0.362765	1.00314	0.624846	0.413064	5.07891	1.22e-05
chrX	122523036	122523454	418	chrX:122523036-122523454	1.58155	1.43625	0.145295	0.355242	0.325869	0.985065	0.330505
chrX	122524038	122524445	407	chrX:122524038-122524445	1.54622	0.702879	0.843339	0.477318	0.12053	6.68803	2.66e-08
chrX	122693257	122694890	1633	chrX:122693257-122694890	0.996984	-0.265103	1.26209	0.462307	0.305701	14.1767	2.35e-31
chrX	122726436	122726869	433	chrX:122726436-122726869	0.995345	-0.75953	1.75488	0.392291	0.82267	10.7794	1.31e-14
chrX	122821086	122822126	1040	chrX:122821086-122822126	0.99524	-0.230503	1.22574	0.433104	0.245623	12.1121	1.72e-22
chrX	122920859	122924888	4029	chrX:122920859-122924888	0.864079	-0.483126	1.3472	0.506917	0.417743	18.3045	2.96e-54
chrX	123135904	123136320	416	chrX:123135904-123136320	1.27402	0.263523	1.0105	0.657488	0.681121	5.24467	5.24e-06
chrX	123294026	123294942	916	chrX:123294026-123294942	1.15163	0.114811	1.03682	0.515902	0.376938	11.0338	2.87e-19
chrX	123308253	123308458	205	chrX:123308253-123308458	1.47248	0.280202	1.19228	0.746405	0.321772	5.9087	2.94e-06
chrX	123342287	123342489	202	chrX:123342287-123342489	1.33355	1.56879	-0.235242	0.411739	0.622109	-0.956412	0.354133
chrX	123381992	123382194	202	chrX:123381992-123382194	1.27736	0.516894	0.760469	0.343767	0.31363	5.17095	5.43e-05
chrX	123383883	123384098	215	chrX:123383883-123384098	1.00369	2.22379	-1.2201	0.379595	0.573624	-7.90684	1.49e-08
chrX	123891514	123891743	229	chrX:123891514-123891743	0.821151	0.985959	-0.164808	0.402695	0.154945	-1.41184	0.169222
chrX	124163986	124167718	3732	chrX:124163986-124167718	0.891878	-0.267643	1.15952	0.454662	0.209087	21.1756	3.07e-66
chrX	124281249	124281978	729	chrX:124281249-124281978	1.52805	0.276079	1.25197	0.608089	0.297086	11.2763	3.49e-18
chrX	124289578	124289809	231	chrX:124289578-124289809	1.24891	0.699545	0.549364	0.439869	0.338373	3.41484	0.00180312
chrX	125126437	125128331	1894	chrX:125126437-125128331	1.59235	0.230726	1.36162	0.609602	0.495912	15.5911	9.2e-37
chrX	125513078	125514896	1818	chrX:125513078-125514896	1.61291	0.302799	1.31012	0.593455	0.525603	16.186	5.76e-38
chrX	125542514	125543085	571	chrX:125542514-125543085	0.981864	0.0631819	0.918682	0.760847	0.14318	4.58545	5.41e-05
chrX	128070309	128070510	201	chrX:128070309-128070510	1.18291	1.13133	0.0515834	0.417364	0.384709	0.278043	0.784023
chrX	128483924	128485649	1725	chrX:128483924-128485649	1.14972	0.254336	0.895386	0.459634	0.262529	12.2067	1.75e-25
chrX	128501685	128502587	902	chrX:128501685-128502587	1.07389	0.0659933	1.0079	0.547	0.582983	8.45472	3.01e-13
chrX	128567575	128567791	216	chrX:128567575-128567791	1.38645	1.60076	-0.214303	0.429933	0.432649	-1.13199	0.271062
chrX	128615583	128616965	1382	chrX:128615583-128616965	1.12625	0.188988	0.937265	0.470573	0.470862	12.1779	3.27e-24
chrX	128639604	128640592	988	chrX:128639604-128640592	1.03335	-0.112159	1.1455	0.444125	0.370187	11.4598	2.57e-20
chrX	128703852	128704064	212	chrX:128703852-128704064	1.26494	-0.200657	1.4656	0.662703	0.165883	7.20633	1.09e-07
chrX	128706730	128706932	202	chrX:128706730-128706932	2.03424	2.04247	-0.00823239	0.363114	0.440959	-0.0529504	0.958843
chrX	128716135	128716335	200	chrX:128716135-128716335	1.28164	0.50404	0.777596	0.389964	0.603923	4.65395	8.21e-05
chrX	128738977	128739254	277	chrX:128738977-128739254	1.10127	-0.0160101	1.11728	0.430592	0.510565	7.0558	6.63e-08
chrX	128752675	128752874	199	chrX:128752675-128752874	1.49782	0.875429	0.622389	0.458936	0.64236	2.91783	0.00663298
chrX	128755236	128755435	199	chrX:128755236-128755435	1.44909	0.271212	1.17788	0.581006	0.285255	6.99291	1.17e-07
chrX	128803507	128803708	201	chrX:128803507-128803708	1.47715	1.31662	0.160535	0.245129	0.375921	1.45371	0.158867
chrX	128804651	128805828	1177	chrX:128804651-128805828	1.11838	0.00163747	1.11675	0.467748	0.462359	12.269	5.4e-24
chrX	128867388	128868389	1001	chrX:128867388-128868389	0.857418	-0.249144	1.10656	0.368747	0.390144	11.6764	9.17e-21
chrX	128887634	128887835	201	chrX:128887634-128887835	1.26018	1.34217	-0.0819899	0.349012	0.248623	-0.692471	0.493928
chrX	128892893	128895002	2109	chrX:128892893-128895002	1.37565	0.268561	1.10709	0.606743	0.339887	13.3493	2.25e-30
chrX	128896206	128896407	201	chrX:128896206-128896407	1.61088	1.4505	0.160374	0.307325	0.278449	1.07022	0.29288
chrX	128914229	128915218	989	chrX:128914229-128915218	1.07683	0.081405	0.995421	0.431162	0.26173	11.6548	7.39e-21
chrX	128918150	128919612	1462	chrX:128918150-128919612	1.39401	0.485476	0.908537	0.370856	0.102544	10.1344	1.21e-18
chrX	128921179	128921531	352	chrX:128921179-128921531	1.28575	0.721231	0.564519	0.49145	0.425869	3.64841	0.000733638
chrX	128940939	128946567	5628	chrX:128940939-128946567	1.28589	0.0998505	1.18604	0.4759	0.503094	26.3833	6.49e-103
chrX	128975141	128975372	231	chrX:128975141-128975372	1.71782	1.21737	0.500444	0.652322	0.799567	2.42164	0.021558
chrX	128976154	128976353	199	chrX:128976154-128976353	1.8	1.36543	0.434571	0.410665	0.717488	2.31116	0.0284381
chrX	128982974	128983174	200	chrX:128982974-128983174	1.46473	1.5472	-0.0824697	0.364273	0.416003	-0.466156	0.646397
chrX	128986776	128987173	397	chrX:128986776-128987173	1.58652	1.04362	0.542905	0.277961	0.638372	3.76161	0.000587291
chrX	128996197	128996405	208	chrX:128996197-128996405	1.80861	1.63434	0.174262	0.416413	0.237248	1.12455	0.269706
chrX	128999104	128999320	216	chrX:128999104-128999320	1.71132	1.04591	0.665409	0.396651	0.282766	3.85381	0.00110601
chrX	129017705	129018101	396	chrX:129017705-129018101	0.0404167	1.57182	-1.5314	0.861983	0.784553	-8.11474	9.09e-09
chrX	129021582	129022549	967	chrX:129021582-129022549	1.00267	0.114364	0.888309	0.436244	0.507232	9.28742	2.74e-15
chrX	129027629	129027842	213	chrX:129027629-129027842	1.51703	1.64215	-0.125116	0.299665	0.408203	-0.952832	0.348598
chrX	129044134	129044336	202	chrX:129044134-129044336	1.31273	0.21601	1.09672	0.402496	0.809032	5.46193	1.72e-05
chrX	129045590	129045820	230	chrX:129045590-129045820	0.941636	0.303586	0.63805	0.375814	0.386645	4.87851	3.58e-05
chrX	129071191	129073334	2143	chrX:129071191-129073334	1.21396	0.116494	1.09746	0.502852	0.357263	14.4194	3.68e-34
chrX	129080540	129080790	250	chrX:129080540-129080790	1.86206	2.03894	-0.176879	0.432538	0.448098	-1.15479	0.257176
chrX	129081888	129083377	1489	chrX:129081888-129083377	1.09256	0.129306	0.963255	0.477482	0.414474	11.0638	1.85e-20
chrX	129126855	129128089	1234	chrX:129126855-129128089	0.898657	-0.336369	1.23503	0.463765	0.124387	14.5434	1.49e-29
chrX	129132601	129134259	1658	chrX:129132601-129134259	1.1891	-0.0331996	1.2223	0.53737	0.618323	14.504	2.79e-32
chrX	129145943	129146142	199	chrX:129145943-129146142	1.36782	0.818939	0.548879	0.260645	0.385554	4.55335	7.73e-05
chrX	129229867	129230825	958	chrX:129229867-129230825	1.11665	-0.0362197	1.15287	0.482289	0.579789	10.7814	1.44e-18
chrX	129300242	129300481	239	chrX:129300242-129300481	1.4137	1.10985	0.303849	0.398529	0.362825	1.90906	0.0659489
chrX	129301031	129302047	1016	chrX:129301031-129302047	1.12441	-0.140159	1.26457	0.388826	0.270579	14.7661	1.2e-27
chrX	129363361	129364141	780	chrX:129363361-129364141	1.03907	-0.135657	1.17473	0.48556	0.526178	10.1966	1.95e-16
chrX	129374266	129374547	281	chrX:129374266-129374547	1.17715	1.28689	-0.109742	0.522757	0.360476	-0.610102	0.546245
chrX	129456741	129456998	257	chrX:129456741-129456998	1.02509	0.983485	0.041606	0.190657	0.375624	0.325267	0.747165
chrX	129485347	129486183	836	chrX:129485347-129486183	0.868293	0.217761	0.650532	0.383005	0.392404	5.83956	7.22e-08
chrX	129629177	129629388	211	chrX:129629177-129629388	0.522818	0.303106	0.219712	0.353213	0.175694	1.47932	0.155889
chrX	129631649	129631884	235	chrX:129631649-129631884	-0.41429	1.38278	-1.79707	0.283448	0.15474	-17.1989	1.27e-22
chrX	129864270	129865026	756	chrX:129864270-129865026	1.1402	-0.165587	1.30579	0.485652	0.219455	11.7351	2.52e-19
chrX	130010664	130010900	236	chrX:130010664-130010900	0.83497	1.20419	-0.369222	0.381441	0.387163	-2.81038	0.0086782
chrX	130019797	130020541	744	chrX:130019797-130020541	1.04415	-0.0315531	1.0757	0.451783	0.289157	10.1281	2.51e-16
chrX	130028985	130031021	2036	chrX:130028985-130031021	0.930856	0.4899	0.440956	0.476553	0.671614	4.73517	4.06e-06
chrX	130034600	130035042	442	chrX:130034600-130035042	0.824636	0.337849	0.486788	0.598656	0.515036	3.26683	0.00191149
chrX	130043362	130044650	1288	chrX:130043362-130044650	1.03896	-0.175734	1.21469	0.485664	0.498254	13.1182	3.41e-26
chrX	130045173	130045754	581	chrX:130045173-130045754	0.982485	-0.3425	1.32498	0.391621	0.201021	11.3282	4.16e-16
chrX	130050200	130050465	265	chrX:130050200-130050465	0.81	0.648131	0.161869	0.344525	0.508927	1.32998	0.193744
chrX	130250700	130251158	458	chrX:130250700-130251158	0.743109	-0.0308333	0.773942	0.496214	0.44882	5.63875	6.76e-07
chrX	130665890	130666770	880	chrX:130665890-130666770	0.393545	1.19643	-0.802885	0.45202	0.289185	-5.31179	1.9e-06
chrX	130672682	130672951	269	chrX:130672682-130672951	0.782778	1.36354	-0.580758	0.363611	0.231732	-3.88146	0.000503741
chrX	130690411	130691302	891	chrX:130690411-130691302	-0.230207	1.10296	-1.33317	0.366355	0.50323	-13.13	9.91e-24
chrX	130696369	130696595	226	chrX:130696369-130696595	0.200847	0.807651	-0.606804	0.536001	0.562832	-3.84241	0.00217486
chrX	130702831	130703030	199	chrX:130702831-130703030	0.468485	1.33389	-0.865404	0.275557	0.550506	-6.3949	4.38e-07
chrX	130708237	130709161	924	chrX:130708237-130709161	1.01405	1.63223	-0.618182	0.373108	0.18106	-6.20115	1.03e-07
chrX	130714202	130715139	937	chrX:130714202-130715139	0.101128	1.48976	-1.38863	0.326394	0.348157	-14.1408	1.39e-26
chrX	130729913	130730142	229	chrX:130729913-130730142	0.55	1.02035	-0.470354	0.341595	0.206275	-2.43181	0.0197526
chrX	130745271	130745472	201	chrX:130745271-130745472	0.82921	1.06245	-0.233239	0.205744	0.137674	-2.21487	0.0307853
chrX	130754107	130755064	957	chrX:130754107-130755064	0.0862794	1.13212	-1.04584	0.364706	0.724458	-10.8288	9.63e-19
chrX	130757529	130757996	467	chrX:130757529-130757996	1.51396	0.134303	1.37966	0.656777	0.178667	8.2842	3.95e-11
chrX	130765356	130765571	215	chrX:130765356-130765571	0.885939	1.08359	-0.197646	0.231127	0.63014	-1.24764	0.222445
chrX	130783854	130784250	396	chrX:130783854-130784250	-0.119324	1.17067	-1.28999	0.404845	0.447435	-11.7443	1.81e-18
chrX	130984460	130985633	1173	chrX:130984460-130985633	0.991364	-0.0625699	1.05393	0.474083	0.550056	11.2789	2.6e-21
chrX	131179126	131180364	1238	chrX:131179126-131180364	1.09115	-0.101787	1.19294	0.425834	0.457925	11.249	8.63e-21
chrX	131450630	131451962	1332	chrX:131450630-131451962	0.939019	-0.0360011	0.975021	0.463386	0.454491	11.6873	6.43e-23
chrX	131769384	131769600	216	chrX:131769384-131769600	1.19255	1.21568	-0.0231363	0.387103	0.429519	-0.14767	0.884082
chrX	131858875	131859084	209	chrX:131858875-131859084	1.68447	1.37769	0.30678	0.198312	0.153225	2.34363	0.0323492
chrX	131917702	131920571	2869	chrX:131917702-131920571	1.05632	-0.124386	1.18071	0.468555	0.439158	18.3853	1.51e-51
chrX	132058902	132059115	213	chrX:132058902-132059115	1.64936	1.81091	-0.161546	0.300719	0.360061	-1.11557	0.27871
chrX	132178676	132180353	1677	chrX:132178676-132180353	1.62502	0.994327	0.630694	0.489663	0.374096	7.63468	2.08e-12
chrX	132227021	132227227	206	chrX:132227021-132227227	0.617758	0.178182	0.439576	0.305989	0.360382	4.00061	0.000365773
chrX	132267391	132267594	203	chrX:132267391-132267594	0.991273	0.727879	0.263394	0.274736	0.453976	1.6118	0.128091
chrX	132285815	132286129	314	chrX:132285815-132286129	1.283	0.776932	0.506068	0.392342	0.279846	3.47688	0.00119643
chrX	132375116	132378006	2890	chrX:132375116-132378006	1.04097	-0.0136782	1.05465	0.567968	0.386173	14.3294	6.17e-36
chrX	132459072	132459271	199	chrX:132459072-132459271	-0.171212	1.18621	-1.35742	0.477774	0.352083	-7.96248	7.66e-07
chrX	132558922	132559121	199	chrX:132558922-132559121	0.87952	1.15727	-0.277753	0.269501	0.270635	-2.47085	0.0201568
chrX	132945568	132947995	2427	chrX:132945568-132947995	1.02168	0.00127573	1.0204	0.410146	0.410666	15.9327	1.72e-40
chrX	133037766	133038043	277	chrX:133037766-133038043	0.98497	0.302323	0.682646	0.386604	0.401949	3.29284	0.00260774
chrX	133128323	133128522	199	chrX:133128323-133128522	0.795757	0.831212	-0.0354546	0.388817	0.330251	-0.188794	0.851486
chrX	133133205	133135945	2740	chrX:133133205-133135945	0.984068	-0.124664	1.10873	0.473321	0.231931	13.4599	9.54e-33
chrX	133198566	133199491	925	chrX:133198566-133199491	1.06513	0.0862794	0.978852	0.448879	0.35247	8.94966	2.86e-14
chrX	133233877	133234096	219	chrX:133233877-133234096	0.897273	0.448485	0.448788	0.443617	0.208475	2.68896	0.0146467
chrX	133334542	133335749	1207	chrX:133334542-133335749	0.823783	-0.261171	1.08495	0.54631	0.419798	10.7893	3.97e-20
chrX	133421451	133422565	1114	chrX:133421451-133422565	1.36484	0.178226	1.18661	0.419025	0.754251	12.7221	1.64e-23
chrX	133506141	133508501	2360	chrX:133506141-133508501	1.41244	0.433169	0.979266	0.476929	0.60488	14.3902	6.62e-35
chrX	133510579	133513191	2612	chrX:133510579-133513191	0.946975	-0.29467	1.24164	0.46221	0.666831	17.1367	3.53e-45
chrX	133631375	133631584	209	chrX:133631375-133631584	1.36582	1.32867	0.0371438	0.384097	0.455532	0.215431	0.831858
chrX	133675355	133675575	220	chrX:133675355-133675575	1.33673	1.18475	0.15198	0.37871	0.409591	1.0882	0.285818
chrX	133758394	133759155	761	chrX:133758394-133759155	0.898955	0.0237879	0.875167	0.468875	0.509872	8.31104	1.32e-12
chrX	133768636	133769511	875	chrX:133768636-133769511	0.781236	0.125099	0.656138	0.371924	0.763874	6.66356	1.29e-09
chrX	133876250	133877065	815	chrX:133876250-133877065	1.13168	-0.00262622	1.1343	0.553969	0.488988	10.9636	1.25e-18
chrX	133952434	133953131	697	chrX:133952434-133953131	0.985136	-0.107225	1.09236	0.491827	0.428699	9.38064	8.26e-15
chrX	133965602	133966170	568	chrX:133965602-133966170	1.08691	-0.458662	1.54557	0.359095	0.460047	13.7143	1.04e-19
chrX	133983337	133984426	1089	chrX:133983337-133984426	1.40264	0.02637	1.37627	0.458112	0.472356	14.8533	5.77e-29
chrX	133993573	133994743	1170	chrX:133993573-133994743	1.20174	-0.0166287	1.21837	0.377976	0.458135	14.3912	2.33e-28
chrX	134013169	134014198	1029	chrX:134013169-134014198	1.26115	0.138727	1.12243	0.508447	0.425873	11.7409	7.6e-21
chrX	134059711	134060866	1155	chrX:134059711-134060866	1.08423	0.0113069	1.07293	0.453748	0.407336	11.5664	2.43e-21
chrX	134097638	134097837	199	chrX:134097638-134097837	1.433	1.49602	-0.0630229	0.254424	0.351618	-0.47856	0.638746
chrX	134116746	134116967	221	chrX:134116746-134116967	0.604596	1.46914	-0.864545	0.485881	0.371229	-3.71864	0.000904832
chrX	134132236	134132595	359	chrX:134132236-134132595	1.62902	1.23426	0.394761	0.369465	0.518811	2.63543	0.0125033
chrX	134156236	134156435	199	chrX:134156236-134156435	1.62206	0.533939	1.08812	0.41368	0.57333	6.28976	8.95e-07
chrX	134178775	134178996	221	chrX:134178775-134178996	-0.269722	1.83705	-2.10677	0.54971	0.408093	-11.7731	4.52e-10
chrX	134197825	134198024	199	chrX:134197825-134198024	1.34391	1.37737	-0.0334648	0.358454	0.216871	-0.194775	0.846947
chrX	134257138	134257711	573	chrX:134257138-134257711	1.00722	-0.0692425	1.07646	0.394967	0.601625	10.6032	1.54e-16
chrX	134305147	134306959	1812	chrX:134305147-134306959	1.08269	-0.830773	1.91346	0.523217	0.497893	16.6674	3.65e-38
chrX	134383132	134384429	1297	chrX:134383132-134384429	1.28584	0.111218	1.17463	0.516901	0.341112	12.6591	2.84e-25
chrX	134394469	134394668	199	chrX:134394469-134394668	1.19909	0.320379	0.878712	0.510704	0.406752	4.67811	0.000147748
chrX	134395583	134396758	1175	chrX:134395583-134396758	1.58134	0.326023	1.25532	0.613339	0.531099	13.3466	5.89e-26
chrX	134397291	134399279	1988	chrX:134397291-134399279	1.36547	0.229769	1.1357	0.608066	0.366326	15.4621	2.9e-36
chrX	134482165	134483892	1727	chrX:134482165-134483892	1.29265	-0.182285	1.47494	0.448617	0.407652	16.0226	2.12e-37
chrX	134558238	134558443	205	chrX:134558238-134558443	1.38109	0.794747	0.586343	0.466635	0.511974	3.61845	0.00104214
chrX	134649574	134649855	281	chrX:134649574-134649855	1.60461	1.06167	0.542939	0.338989	0.253096	4.41495	0.000114168
chrX	134669825	134670046	221	chrX:134669825-134670046	1.32576	0.994192	0.331566	0.434307	0.231094	2.04986	0.0494495
chrX	134675245	134675817	572	chrX:134675245-134675817	1.84221	1.97301	-0.130793	0.392973	0.555531	-1.10552	0.273469
chrX	134693674	134694866	1192	chrX:134693674-134694866	1.7958	1.88276	-0.0869602	0.40834	0.335413	-0.811374	0.419638
chrX	134710948	134712141	1193	chrX:134710948-134712141	1.74936	1.98569	-0.236326	0.446499	0.538492	-2.32152	0.0221613
chrX	134736841	134737913	1072	chrX:134736841-134737913	1.64445	1.27235	0.3721	0.406199	0.327163	3.41336	0.000882595
chrX	134763425	134763818	393	chrX:134763425-134763818	1.87316	2.52968	-0.656522	0.393399	0.258265	-3.43032	0.00219956
chrX	134764392	134764617	225	chrX:134764392-134764617	1.49727	0.947576	0.549697	0.376501	0.440261	2.2007	0.0589801
chrX	134780683	134781876	1193	chrX:134780683-134781876	0.656061	2.2347	-1.57864	0.431129	0.400658	-9.21642	2.97e-08
chrX	134797933	134798648	715	chrX:134797933-134798648	1.30108	2.31373	-1.01265	0.378578	0.238661	-8.48874	3.06e-11
chrX	134883211	134883865	654	chrX:134883211-134883865	1.18899	-0.25658	1.44557	0.467922	0.647614	10.8973	4.89e-17
chrX	134884474	134884692	218	chrX:134884474-134884692	1.38497	-0.161894	1.54686	1.26803	0.359537	4.72245	7.43e-05
chrX	134895012	134896004	992	chrX:134895012-134896004	1.35913	0.00111358	1.35801	0.48859	0.390446	13.0383	1.41e-23
chrX	135007993	135008535	542	chrX:135007993-135008535	1.56197	0.292677	1.26929	0.563731	0.47976	11.202	2.8e-16
chrX	135053507	135053728	221	chrX:135053507-135053728	1.06215	0.946414	0.115737	0.266421	0.0767981	1.31413	0.198561
chrX	135056581	135058483	1902	chrX:135056581-135058483	1.198	0.377536	0.820459	0.556853	0.609804	9.30379	2.21e-17
chrX	135118838	135119569	731	chrX:135118838-135119569	1.46569	1.56928	-0.103587	0.466585	0.541885	-1.06012	0.292089
chrX	135122373	135122907	534	chrX:135122373-135122907	0.943268	1.76677	-0.823504	0.524725	0.157663	-5.63337	3.52e-07
chrX	135141570	135141789	219	chrX:135141570-135141789	1.74482	1.16038	0.584439	0.259672	0.537299	2.83809	0.0101624
chrX	135160460	135161527	1067	chrX:135160460-135161527	0.794388	0.0897039	0.704684	0.402859	0.345877	7.63341	6.71e-12
chrX	135210007	135210472	465	chrX:135210007-135210472	1.16127	0.363409	0.797864	0.529198	0.48242	3.9279	0.000460772
chrX	135315093	135315308	215	chrX:135315093-135315308	0.572727	0.144066	0.428662	0.331211	0.59415	3.02032	0.00551727
chrX	135406321	135407914	1593	chrX:135406321-135407914	0.835318	-0.463845	1.29916	0.488013	0.4919	13.7231	1.84e-29
chrX	135414210	135414409	199	chrX:135414210-135414409	1.064	0.418055	0.645945	0.424606	0.246614	4.02452	0.000350439
chrX	135676567	135677939	1372	chrX:135676567-135677939	1.09643	-0.0162121	1.11264	0.472151	0.364049	13.5814	1.73e-28
chrX	135783992	135784326	334	chrX:135783992-135784326	1.56041	1.17191	0.388496	0.367877	0.547022	2.21955	0.0323395
chrX	135789866	135790846	980	chrX:135789866-135790846	0.834901	-0.295964	1.13087	0.480044	0.478413	10.9016	1.32e-19
chrX	135817541	135817762	221	chrX:135817541-135817762	1.20412	1.11535	0.0887678	0.307381	0.294498	0.690596	0.49593
chrX	135818967	135819834	867	chrX:135818967-135819834	1.1637	0.0803871	1.08331	0.423646	0.311873	10.5986	1.16e-17
chrX	135894557	135894756	199	chrX:135894557-135894756	1.32064	1.49848	-0.177849	0.37169	0.493546	-1.00003	0.330472
chrX	135940399	135941746	1347	chrX:135940399-135941746	1.40881	0.755168	0.653644	0.37981	0.174723	6.24198	4.8e-09
chrX	135942348	135942629	281	chrX:135942348-135942629	1.12557	0.694129	0.431439	0.839233	0.980403	1.87113	0.068387
chrX	135943424	135944325	901	chrX:135943424-135944325	0.977454	-0.0661515	1.04361	0.455763	0.332899	10.0943	3.31e-17
chrX	135961931	135963104	1173	chrX:135961931-135963104	0.938045	-0.279539	1.21758	0.440961	0.46608	15.6942	2.2e-31
chrX	136315361	136315629	268	chrX:136315361-136315629	1.94725	0.825568	1.12168	0.402641	0.602767	6.89566	3.21e-08
chrX	136335188	136335505	317	chrX:136335188-136335505	0.520061	-0.403283	0.923343	0.329231	0.436751	5.93648	4.46e-06
chrX	136336800	136340310	3510	chrX:136336800-136340310	1.03195	-0.286028	1.31798	0.457971	0.796692	24.1224	5.47e-78
chrX	136351520	136351946	426	chrX:136351520-136351946	0.974136	0.281742	0.692394	0.674848	1.31443	2.55274	0.0144931
chrX	136455266	136456454	1188	chrX:136455266-136456454	0.840741	-0.259802	1.10054	0.377258	0.350771	13.7715	1.35e-27
chrX	136457032	136461150	4118	chrX:136457032-136461150	0.783748	-0.177603	0.961351	0.487608	0.311772	16.6414	2.78e-48
chrX	136473189	136473925	736	chrX:136473189-136473925	0.787375	0.0710416	0.716333	0.478426	0.428727	6.42649	7.05e-09
chrX	136475137	136479525	4388	chrX:136475137-136479525	1.02175	-0.261473	1.28322	0.462417	0.424371	24.2541	4.08e-86
chrX	136483400	136484939	1539	chrX:136483400-136484939	1.10858	-0.238182	1.34676	0.385985	0.842331	16.1886	1.44e-34
chrX	137620466	137622277	1811	chrX:137620466-137622277	0.960864	-0.137593	1.09846	0.516204	0.724715	13.0255	2.66e-28
chrX	137767323	137767525	202	chrX:137767323-137767525	1.74555	1.39576	0.349788	0.391663	0.469875	2.07079	0.0515348
chrX	138104408	138105083	675	chrX:138104408-138105083	0.697143	-0.219784	0.916926	0.445201	0.569643	6.86216	1.69e-09
chrX	138112881	138115354	2473	chrX:138112881-138115354	1.05522	0.116633	0.938588	0.510688	0.240549	15.2802	1.63e-38
chrX	138116020	138116296	276	chrX:138116020-138116296	0.938061	0.468485	0.469576	0.426383	0.376464	3.32763	0.00230077
chrX	138356612	138357163	551	chrX:138356612-138357163	1.36282	0.362222	1.0006	0.586502	0.499544	6.49448	2.31e-08
chrX	138465111	138465508	397	chrX:138465111-138465508	1.29818	0.738769	0.559413	0.321264	0.296273	4.0583	0.000212891
chrX	138601366	138602468	1102	chrX:138601366-138602468	1.17705	0.164931	1.01211	0.49581	0.423233	11.8817	1.81e-22
chrX	138841024	138843514	2490	chrX:138841024-138843514	0.936568	0.0346023	0.901966	0.514152	0.583407	13.2188	7.16e-31
chrX	138942131	138942362	231	chrX:138942131-138942362	0.985879	0.500505	0.485374	0.324076	0.210606	3.76888	0.000692423
chrX	138966982	138967203	221	chrX:138966982-138967203	0.580636	0.832348	-0.251712	0.306495	0.658441	-1.26303	0.227897
chrX	139000750	139002510	1760	chrX:139000750-139002510	1.22017	0.126288	1.09388	0.474226	0.323576	14.2095	2.85e-31
chrX	139160234	139160451	217	chrX:139160234-139160451	1.26382	1.50581	-0.24199	0.366452	0.302271	-1.996	0.0550742
chrX	139349075	139349754	679	chrX:139349075-139349754	0.947143	0.0557359	0.891407	0.487409	0.296845	7.21966	3.81e-10
chrX	139411558	139421341	9783	chrX:139411558-139421341	1.01869	-0.103525	1.12222	0.403078	0.448737	32.199	1.55e-158
chrX	139459180	139459380	200	chrX:139459180-139459380	0.720182	0.910455	-0.190273	0.276835	0.322895	-1.24387	0.227931
chrX	139674269	139675236	967	chrX:139674269-139675236	0.892959	0.014449	0.87851	0.345556	0.375857	9.35673	7.75e-16
chrX	139686034	139686505	471	chrX:139686034-139686505	1.42912	0.302929	1.12619	0.667372	0.574571	4.07234	0.000308651
chrX	139880368	139880607	239	chrX:139880368-139880607	1.02897	0.791515	0.237455	0.423185	0.14145	1.93003	0.0636851
chrX	139913234	139913467	233	chrX:139913234-139913467	1.43408	1.40485	0.0292361	0.278606	0.361817	0.221813	0.829442
chrX	139925239	139925472	233	chrX:139925239-139925472	1.22271	1.45591	-0.233194	0.296819	0.433923	-1.21383	0.231344
chrX	140006003	140006228	225	chrX:140006003-140006228	1.71945	1.13848	0.58097	0.578976	0.435205	1.89744	0.0904719
chrX	140098204	140099371	1167	chrX:140098204-140099371	1.23633	-0.0595455	1.29587	0.488795	0.683807	9.51551	1.88e-16
chrX	140164176	140164385	209	chrX:140164176-140164385	1.997	2.18144	-0.184439	0.352414	0.725988	-0.804644	0.43542
chrX	140418700	140418927	227	chrX:140418700-140418927	1.63882	0.465	1.17382	0.864283	0.424981	4.21959	0.000545969
chrX	140613344	140613543	199	chrX:140613344-140613543	0.0450189	1.17034	-1.12532	0.368699	0.266482	-8.68298	7.52e-08
chrX	140819200	140819449	249	chrX:140819200-140819449	1.26333	0.247323	1.01601	0.410272	0.364684	6.5728	3.78e-07
chrX	141119301	141119526	225	chrX:141119301-141119526	1.21376	0.611263	0.602495	0.354031	0.412721	4.18701	0.000218052
chrX	141120613	141120827	214	chrX:141120613-141120827	1.53018	0.97298	0.557202	0.586429	0.23762	2.75044	0.00988217
chrX	142548908	142551535	2627	chrX:142548908-142551535	1.14039	0.193951	0.94644	0.574005	0.433437	12.6305	2.53e-29
chrX	142668012	142668255	243	chrX:142668012-142668255	1.591	0.398182	1.19282	0.649263	0.437512	6.47454	4.21e-07
chrX	144519306	144521047	1741	chrX:144519306-144521047	1.65006	0.721107	0.928954	0.460474	0.274355	12.3209	3.35e-26
chrX	144705884	144708281	2397	chrX:144705884-144708281	0.866384	-0.0721798	0.938564	0.452246	0.298057	13.5005	2.9e-31
chrX	144710582	144711784	1202	chrX:144710582-144711784	1.15555	0.432841	0.722712	0.524826	0.303009	6.33258	3.62e-09
chrX	145283860	145284149	289	chrX:145283860-145284149	1.36295	0.936591	0.426364	0.295292	0.324215	3.43094	0.00136313
chrX	145508122	145510044	1922	chrX:145508122-145510044	1.7219	0.383868	1.33803	0.559187	0.259518	18.2822	1.15e-44
chrX	145699107	145699539	432	chrX:145699107-145699539	0.678273	1.76836	-1.09009	0.42044	0.292147	-7.27165	4.1e-10
chrX	145703397	145703685	288	chrX:145703397-145703685	1.24442	1.41899	-0.174566	0.450013	0.175826	-1.07016	0.29332
chrX	146800552	146802083	1531	chrX:146800552-146802083	1.10648	-0.0986768	1.20516	0.376226	0.928899	13.8401	3.31e-29
chrX	146870284	146870867	583	chrX:146870284-146870867	1.50436	0.368737	1.13563	0.472525	0.510045	9.86596	2.75e-14
chrX	146941158	146941638	480	chrX:146941158-146941638	1.64333	0.299439	1.34389	0.892592	0.264601	6.05976	2.06e-07
chrX	147389168	147391084	1916	chrX:147389168-147391084	1.11874	0.215419	0.903318	0.521649	0.39147	11.4337	1.09e-23
chrX	147393901	147394128	227	chrX:147393901-147394128	1.3713	0.701364	0.669939	0.416872	0.29069	4.73011	5.18e-05
chrX	147427037	147427254	217	chrX:147427037-147427254	-0.774214	1.4174	-2.19161	0.402848	0.288073	-17.1419	9.18e-21
chrX	147880492	147880701	209	chrX:147880492-147880701	1.02345	0.690947	0.332508	0.20316	0.258719	2.95124	0.00921186
chrX	148360274	148360810	536	chrX:148360274-148360810	0.621273	0.272333	0.348939	0.528863	0.333307	2.76083	0.00790425
chrX	148372385	148372641	256	chrX:148372385-148372641	1.57927	1.37768	0.201596	0.393366	0.499764	1.47374	0.150648
chrX	148392821	148393025	204	chrX:148392821-148393025	0.498545	-0.489722	0.988268	0.431515	0.501384	5.84208	2.63e-06
chrX	148394391	148395001	610	chrX:148394391-148395001	1.02309	0.141848	0.881242	0.401078	0.405634	7.04243	8.77e-09
chrX	148415086	148415286	200	chrX:148415086-148415286	0.75	-0.654735	1.40474	0.636809	0.629778	5.06492	6e-05
chrX	148416399	148416598	199	chrX:148416399-148416598	1.56736	0.735757	0.831606	0.433105	0.690745	4.03217	0.000862242
chrX	148429317	148431190	1873	chrX:148429317-148431190	1.34672	0.152516	1.1942	0.582231	0.226196	15.6982	6.86e-37
chrX	148434913	148435281	368	chrX:148434913-148435281	1.65573	1.12155	0.534174	0.462267	0.353733	3.71839	0.000589526
chrX	148438920	148439201	281	chrX:148438920-148439201	1.91824	1.78687	0.131374	0.368762	0.276596	1.14498	0.26105
chrX	148472073	148472327	254	chrX:148472073-148472327	1.62948	1.21045	0.41903	0.59	0.446463	2.23674	0.0331292
chrX	148475829	148476508	679	chrX:148475829-148476508	2.01634	0.869827	1.14651	0.517011	0.140484	10.408	1.42e-15
chrX	148482296	148482627	331	chrX:148482296-148482627	1.71139	0.20947	1.50192	0.460308	0.465079	10.2283	9.98e-13
chrX	148483482	148484020	538	chrX:148483482-148484020	1.72709	1.04513	0.681965	0.442727	0.532323	5.90511	1.56e-07
chrX	148484670	148484939	269	chrX:148484670-148484939	1.72277	1.07761	0.645159	0.520396	0.556157	3.89574	0.00034673
chrX	148486033	148486674	641	chrX:148486033-148486674	1.64753	0.853312	0.794221	0.433253	0.35951	7.30559	2.48e-10
chrX	148487276	148487531	255	chrX:148487276-148487531	2.13955	1.82172	0.317828	0.431721	0.422119	2.40294	0.0224389
chrX	148489675	148489874	199	chrX:148489675-148489874	1.55255	1.23455	0.318	0.346784	0.220855	1.45132	0.16943
chrX	148490455	148490820	365	chrX:148490455-148490820	1.75491	1.46312	0.291788	0.404861	0.461179	2.14701	0.0369466
chrX	148520492	148521625	1133	chrX:148520492-148521625	1.10973	-0.10604	1.21577	0.486333	0.434866	12.3993	6.74e-23
chrX	148580582	148580803	221	chrX:148580582-148580803	2.32377	0.431439	1.89233	0.976288	0.872481	5.53171	2.3e-05
chrX	148657499	148657864	365	chrX:148657499-148657864	1.74193	1.38366	0.358267	0.355086	0.526663	2.75553	0.00908059
chrX	148658382	148658621	239	chrX:148658382-148658621	1.67339	1.42596	0.247434	0.532761	0.320373	1.17421	0.249984
chrX	148660682	148661079	397	chrX:148660682-148661079	2.07675	1.61472	0.462034	0.438876	0.379381	3.47868	0.00119926
chrX	148661597	148662157	560	chrX:148661597-148662157	1.73411	0.827525	0.906581	0.392382	0.420651	9.02886	7.21e-13
chrX	148663378	148663647	269	chrX:148663378-148663647	1.81339	1.04505	0.768343	0.459956	0.330014	3.8362	0.000576692
chrX	148664297	148664840	543	chrX:148664297-148664840	1.55465	1.13759	0.417063	0.49335	0.292052	3.13785	0.00259385
chrX	148665707	148666002	295	chrX:148665707-148666002	1.83827	0.285606	1.55267	0.628123	0.641148	9.28398	9.83e-12
chrX	148671831	148672350	519	chrX:148671831-148672350	2.11464	1.02167	1.09297	0.537961	0.283654	8.25129	4.47e-11
chrX	148675994	148676248	254	chrX:148675994-148676248	1.84006	1.72131	0.118747	0.316822	0.301959	0.895915	0.378045
chrX	148719917	148720215	298	chrX:148719917-148720215	0.752	0.451667	0.300334	0.334386	0.202569	1.92625	0.0710206
chrX	148770524	148771235	711	chrX:148770524-148771235	1.31199	0.462746	0.849242	0.416987	0.188606	7.88555	9.86e-12
chrX	148848633	148848914	281	chrX:148848633-148848914	1.77386	1.69008	0.0837879	0.374127	0.456347	0.654264	0.516512
chrX	148852455	148852946	491	chrX:148852455-148852946	1.68433	1.29797	0.386366	0.309938	0.419356	3.02982	0.00354802
chrX	148856702	148859473	2771	chrX:148856702-148859473	1.40245	0.27911	1.12334	0.616415	0.412585	15.6662	5.02e-41
chrX	149280120	149285137	5017	chrX:149280120-149285137	0.989028	-0.0123307	1.00136	0.517828	0.426151	21.7097	9.82e-76
chrX	149431735	149431936	201	chrX:149431735-149431936	1.343	0.348535	0.994465	0.241332	0.106198	7.59923	3.49e-08
chrX	149466354	149467281	927	chrX:149466354-149467281	1.31725	0.261424	1.05582	0.45859	0.439327	9.63871	4.79e-16
chrX	149487226	149488477	1251	chrX:149487226-149488477	0.932769	-0.0976865	1.03046	0.402554	0.192509	12.4831	2.46e-24
chrX	149590455	149590806	351	chrX:149590455-149590806	1.62936	1.68609	-0.0567222	0.420601	0.327649	-0.389735	0.699405
chrX	149611922	149613222	1300	chrX:149611922-149613222	0.973967	-0.0956006	1.06957	0.531083	0.408418	10.0183	2.44e-18
chrX	149678733	149678936	203	chrX:149678733-149678936	1.5483	0.991313	0.55699	0.348479	0.257144	4.27714	0.000193178
chrX	149681243	149681939	696	chrX:149681243-149681939	1.34833	0.259015	1.08931	0.462353	0.512641	11.4146	6.56e-19
chrX	149682807	149683106	299	chrX:149682807-149683106	1.20045	0.371111	0.829343	0.408184	0.549069	5.14177	1.46e-05
chrX	149687100	149688329	1229	chrX:149687100-149688329	1.71051	0.798654	0.911857	0.466129	0.832737	10.0636	2.95e-18
chrX	149689617	149689923	306	chrX:149689617-149689923	1.46961	0.646174	0.823439	0.588675	0.196074	5.33794	4.88e-06
chrX	149691252	149691451	199	chrX:149691252-149691451	0.978909	0.476237	0.502672	0.54512	0.453827	2.86681	0.00740643
chrX	149694061	149694267	206	chrX:149694061-149694267	1.1857	1.39255	-0.206854	0.401015	0.365478	-1.49396	0.145573
chrX	149696512	149696793	281	chrX:149696512-149696793	1.41945	1.26424	0.155212	0.265517	0.306072	1.23175	0.22791
chrX	149817286	149818879	1593	chrX:149817286-149818879	0.968693	0.0404167	0.928276	0.490389	0.452555	12.2547	2.77e-25
chrX	149822771	149823014	243	chrX:149822771-149823014	-0.00310608	1.52712	-1.53023	0.464929	0.305855	-6.90055	6.7e-07
chrX	149895041	149895531	490	chrX:149895041-149895531	1.20956	0.414818	0.794745	0.37892	0.625022	6.28693	6.4e-08
chrX	149896512	149896825	313	chrX:149896512-149896825	1.46933	0.343586	1.12575	0.510619	0.344706	7.29314	6.96e-08
chrX	149901721	149903073	1352	chrX:149901721-149903073	0.85765	0.00112476	0.856526	0.492764	0.519612	9.67687	3.01e-17
chrX	149903640	149904635	995	chrX:149903640-149904635	0.988942	0.000971061	0.987971	0.441341	0.24496	11.1941	5.9e-20
chrX	150001461	150001931	470	chrX:150001461-150001931	0.745212	0.261566	0.483646	0.361301	0.555217	3.80948	0.000331571
chrX	150093709	150095126	1417	chrX:150093709-150095126	1.15146	0.0433434	1.10812	0.411674	0.430593	13.1054	2.44e-26
chrX	150095827	150098391	2564	chrX:150095827-150098391	1.04515	0.121693	0.923454	0.50038	0.661824	11.2275	2.28e-24
chrX	150098988	150099928	940	chrX:150098988-150099928	1.14384	2.34681	-1.20297	0.438812	0.459355	-12.3668	3.23e-24
chrX	150103043	150103439	396	chrX:150103043-150103439	0.418855	0.475909	-0.0570545	0.35634	0.23778	-0.444435	0.658611
chrX	150146063	150147248	1185	chrX:150146063-150147248	0.939561	0.114501	0.825059	0.386695	0.160967	8.2913	1.34e-13
chrX	150264711	150264912	201	chrX:150264711-150264912	0.915545	0.289773	0.625773	0.376679	0.256562	4.80821	0.000124375
chrX	150279206	150279405	199	chrX:150279206-150279405	0.309273	-0.24	0.549273	0.331625	0.599428	3.64894	0.00112243
chrX	150289994	150290323	329	chrX:150289994-150290323	0.9825	0.210739	0.771761	0.36239	0.401216	6.42142	1.03e-07
chrX	150310950	150311358	408	chrX:150310950-150311358	1.77309	0.468439	1.30465	0.617644	0.430021	9.84832	3.86e-13
chrX	150315753	150316615	862	chrX:150315753-150316615	0.84397	-0.220859	1.06483	0.444148	0.328103	10.3431	2.83e-17
chrX	150322222	150322426	204	chrX:150322222-150322426	2.04752	1.17923	0.868285	0.555616	0.576058	4.59841	6.77e-05
chrX	150482613	150483578	965	chrX:150482613-150483578	1.70087	0.722788	0.978085	0.536214	0.17356	8.85155	2.08e-14
chrX	150613472	150614875	1403	chrX:150613472-150614875	1.26811	0.224424	1.04368	0.462992	1.06726	11.761	4.37e-23
chrX	150620047	150620246	199	chrX:150620047-150620246	1.43079	1.15659	0.274197	0.593269	0.244555	1.55318	0.130668
chrX	150623202	150623401	199	chrX:150623202-150623401	1.01664	0.600833	0.415803	0.569236	0.258094	2.3334	0.0334913
chrX	150641718	150641966	248	chrX:150641718-150641966	1.19664	0.535379	0.661258	0.433274	0.348783	3.81866	0.00132094
chrX	150662372	150662571	199	chrX:150662372-150662571	1.25303	0.830303	0.422727	0.370841	0.198687	3.29475	0.00261195
chrX	150672579	150672850	271	chrX:150672579-150672850	0.80697	0.261919	0.54505	0.334734	0.270569	3.82777	0.000595275
chrX	150740391	150740606	215	chrX:150740391-150740606	0.966454	0.602424	0.36403	0.291483	0.46597	2.2681	0.0369996
chrX	150824209	150824409	200	chrX:150824209-150824409	1.17788	1.74508	-0.567197	0.41744	0.246325	-2.10595	0.0705109
chrX	150831501	150838833	7332	chrX:150831501-150838833	1.60411	1.57509	0.0290178	0.558798	0.383884	0.657334	0.511208
chrX	150843082	150843315	233	chrX:150843082-150843315	1.4003	0.970884	0.429419	0.479249	0.251586	1.67015	0.106397
chrX	150874116	150874750	634	chrX:150874116-150874750	1.4949	2.18026	-0.685361	0.427539	0.270657	-5.07918	1.45e-05
chrX	150893210	150894386	1176	chrX:150893210-150894386	1.30227	0.0848295	1.21744	0.475195	0.558223	13.8257	4.15e-27
chrX	151038210	151038430	220	chrX:151038210-151038430	1.37618	1.1671	0.209086	0.429981	0.384034	1.49447	0.145578
chrX	151057192	151057819	627	chrX:151057192-151057819	1.83565	0.627639	1.20801	0.601621	0.37967	8.413	7.41e-12
chrX	151370255	151370462	207	chrX:151370255-151370462	0.478667	-0.0519192	0.530586	0.318004	0.342247	3.45804	0.00164654
chrX	151399233	151400256	1023	chrX:151399233-151400256	1.68454	0.929583	0.754953	0.484158	0.486515	7.94873	1.98e-12
chrX	151556521	151558113	1592	chrX:151556521-151558113	1.05024	0.0790341	0.97121	0.466097	0.327394	13.244	4e-28
chrX	151566091	151566290	199	chrX:151566091-151566290	-0.118763	1.84519	-1.96395	0.290271	0.402467	-19.447	1.59e-15
chrX	151570670	151570995	325	chrX:151570670-151570995	1.54352	1.74071	-0.197192	0.533059	0.361232	-1.11678	0.272674
chrX	151571836	151572035	199	chrX:151571836-151572035	1.28139	0.455808	0.825586	0.428618	0.377871	5.24225	1.09e-05
chrX	151598147	151599010	863	chrX:151598147-151599010	1.84778	1.43604	0.411739	0.527067	0.449615	3.31584	0.00129697
chrX	151602560	151602769	209	chrX:151602560-151602769	1.66391	1.85735	-0.193439	0.235375	0.466694	-1.13401	0.270448
chrX	151617751	151618535	784	chrX:151617751-151618535	1.98195	0.682761	1.29919	0.583114	0.421523	12.4568	1.31e-21
chrX	151620333	151620532	199	chrX:151620333-151620532	1.59503	1.31409	0.280939	0.442122	0.417598	1.87121	0.0708477
chrX	151633620	151634405	785	chrX:151633620-151634405	1.86948	1.0279	0.84158	0.596188	0.352178	8.01856	5.75e-12
chrX	151650798	151650997	199	chrX:151650798-151650997	1.73264	1.6275	0.105136	0.475887	0.481276	0.502674	0.620686
chrX	151653180	151653971	791	chrX:151653180-151653971	1.88945	0.910739	0.978716	0.517522	0.242403	9.43189	7.6e-15
chrX	151672400	151673185	785	chrX:151672400-151673185	1.99418	0.952235	1.04194	0.567144	0.335212	9.10659	3.18e-14
chrX	151688264	151689041	777	chrX:151688264-151689041	1.9488	0.748258	1.20054	0.6369	0.437466	9.68058	2.33e-15
chrX	151704033	151704242	209	chrX:151704033-151704242	1.74855	1.73146	0.0170809	0.425868	0.216935	0.120693	0.904713
chrX	151707792	151708654	862	chrX:151707792-151708654	1.91201	1.47882	0.433195	0.481379	0.524611	3.69204	0.000390228
chrX	151749622	151750650	1028	chrX:151749622-151750650	1.14098	-0.230207	1.37118	0.412893	0.454415	14.0308	4.11e-26
chrX	151764775	151764977	202	chrX:151764775-151764977	1.68182	1.44083	0.240985	0.448237	0.298669	1.54528	0.138429
chrX	151784996	151785222	226	chrX:151784996-151785222	1.55264	1.09914	0.453495	0.34364	0.482988	2.86397	0.0075247
chrX	151789708	151789907	199	chrX:151789708-151789907	1.22268	1.94492	-0.722248	0.54456	0.930124	-3.42047	0.0021187
chrX	151816556	151817561	1005	chrX:151816556-151817561	1.02881	0.35429	0.674517	0.426149	0.534973	5.74694	1.42e-07
chrX	151826243	151826442	199	chrX:151826243-151826442	1.44242	0.753687	0.688737	0.474904	0.403195	4.287	0.000163883
chrX	151833870	151834201	331	chrX:151833870-151834201	1.69576	1.115	0.580758	0.421943	0.575752	3.41453	0.001891
chrX	151860594	151861292	698	chrX:151860594-151861292	1.00248	0.0637879	0.938692	0.469305	0.258322	8.19867	5.66e-12
[truncated: 310 more rows]
