# Supplementary material for: DNA methylation profiles of human active and inactive X chromosomes
Source: HighWire-hosted journal article supplement (doi:10.1101/gr.112680.110), 2011-08-23
Supplement: Supplementary_Table5_11_chrX_possible_DMRs.xlsx [file Supplementary_Table5_11_chrX_possible_DMRs.xlsx]

## Sheet: Sheet1
Supplementary Table 5. Identification of regions of nominal methylation difference between maternally and paternally-derived X chromosomes. Shown are eleven chrX loci comprising 3 or more probes with an unadjusted p-value <0.01 that were separated by <500bp
Probe start position, bp	Difference in mean log2 ratio between 45,Xmat and 45,Xpat	t-statistic	Raw p-value	FDR-adjusted p-value
14202918	0.882568	2.71439	0.0066398	0.99999
14203318	0.913964	2.81095	0.00493954	0.99999
14203408	0.850739	2.6165	0.00888366	0.99999
18161105	0.893234	2.7472	0.00601073	0.99999
18161225	0.812963	2.50032	0.0124082	0.99999
18161305	0.800513	2.46203	0.0138154	0.99999
43161705	0.904383	2.78149	0.00541108	0.99999
43161805	0.988416	3.03993	0.00236631	0.99999
43161925	1.15983	3.56711	0.000360938	0.99999
55508822	0.851432	2.61863	0.00882838	0.99999
55508917	0.963349	2.96284	0.00304818	0.99999
55509012	0.839411	2.58166	0.00983265	0.99999
55509102	0.910065	2.79896	0.00512675	0.99999
66821824	0.902098	2.77446	0.0055294	0.99999
66821919	0.848878	2.61077	0.00903377	0.99999
66822124	1.02133	3.14117	0.00168272	0.99999
68896323	0.823913	2.53399	0.0112771	0.99999
68896418	1.13259	3.48334	0.000495207	0.99999
68896523	0.845011	2.59888	0.00935283	0.99999
93362706	0.981034	3.01723	0.00255097	0.99999
93362816	1.01165	3.11139	0.00186209	0.99999
93362926	0.881595	2.7114	0.00670004	0.99999
132514525	0.823519	2.53278	0.0113161	0.99999
132514620	0.922613	2.83755	0.00454609	0.99999
132514705	0.981404	3.01837	0.00254142	0.99999
133422523	1.14807	3.53094	0.000414081	0.99999
133422623	1.00044	3.07691	0.0020916	0.99999
133422823	0.829123	2.55002	0.0107718	0.99999
143045706	0.82688	2.54312	0.0109868	0.99999
143045801	0.915229	2.81484	0.00488012	0.99999
143045921	0.916041	2.81734	0.00484232	0.99999
143096419	0.839379	2.58156	0.00983545	0.99999
143096615	0.89132	2.74131	0.0061195	0.99999
143096705	0.973866	2.99518	0.0027428	0.99999
